# Supplementary material for: Environmental impacts of electricity generation at global, regional and national scales in 1980–2011: what can we learn for future energy planning?
Source: Royal Society of Chemistry journal article supplement (doi:10.1039/c4ee03832k), 2015-01-01
Supplement: c4ee03832k2.xlsx [file c4ee03832k2.xlsx]

## Sheet: Index
Environmental impacts of electricity generation at global, regional and national scales in 1980 - 2011: What can we learn for future energy planning?
Electronic Supplementary Information 2
Alexis Laurent a, *, Nieves Espinosa b
a Division for Quantitative Sustainability Assessment (QSA), Department of Management Engineering, Technical University of Denmark (DTU), Lyngby, Denmark
b Department of Energy Conversion and Storage, Technical University of Denmark (DTU), Roskilde, Denmark
* To whom correspondence should be addressed:
Tel: (+45) 45 25 44 23
Email: alau@dtu.dk
This workbook contains:
- Table S4: Time-differentiated national and regional impact intensities (per-kWh impact scores)
- Table S5: Time-differentiated normalised national and regional impact intensities (world as reference): Ratios sorted across countries for each year and impact category
- Table S6: Time-differentiated normalised national and regional impact intensities (world as reference): Ratios sorted across impacts for each year and country

## Sheet: Table_S4
TIME-DIFFERENTIATED IMPACT INTENSITIES (PER-kWh IMPACT SCORES)		Climate change (kg-CO2/kWh)																																	Human toxicity - cancer effects (nber of cases/kWh)
		1980	1981	1982	1983	1984	1985	1986	1987	1988	1989	1990	1991	1992	1993	1994	1995	1996	1997	1998	1999	2000	2001	2002	2003	2004	2005	2006	2007	2008	2009	2010	2011		1980	1981	1982	1983	1984	1985	1986	1987	1988	1989	1990	1991	1992	1993	1994
Africa	Mali	0.179775	0.179495	0.150116	0.131439	0.168815	0.169159	0.189232	0.209511	0.264998	0.262641	0.214412	0.213479	0.197294	0.21292	0.159685	0.226629	0.289226	0.338891	0.328899	0.338863	0.338679	0.338605	0.336229	0.377407	0.370912	0.359734	0.362299	0.362742	0.353822	0.339736	0.334246	0.332363		1.483e-09	1.49961e-09	1.37249e-09	1.26501e-09	1.38601e-09	1.35392e-09	1.50444e-09	1.72464e-09	1.9349e-09	1.88782e-09	1.77372e-09	1.74804e-09	1.66613e-09	1.79608e-09	1.56688e-09
	Democratic Republic of the Congo	0.0463473	0.0429153	0.0391218	0.0329898	0.0337832	0.0321933	0.0312017	0.0329376	0.031243	0.0138282	0.0124442	0.012667	0.0107154	0.010858	0.0109301	0.0106908	0.0107055	0.0110232	0.0111433	0.0109301	0.0107306	0.0107357	0.010703	0.0121639	0.0117813	0.0116727	0.0102439	0.0121011	0.0134141	0.0120953	0.0120731	0.0120513		8.7791e-10	8.73947e-10	8.69566e-10	8.62486e-10	8.63402e-10	8.61566e-10	8.60421e-10	8.62426e-10	8.60469e-10	8.4036e-10	8.38762e-10	8.39019e-10	8.36765e-10	8.3693e-10	8.37013e-10
	Swaziland	0.624192	0.661861	0.740185	0.839833	0.678716	0.580269	0.675445	0.595705	0.56483	0.566377	0.647494	0.580306	0.580306	0.580306	0.580102	0.580037	0.580306	0.566377	0.580306	0.580306	0.658183	0.658179	0.643756	0.780958	0.805283	0.700487	0.733487	0.699161	0.705581	0.643733	0.615167	0.590983		3.24618e-08	3.44022e-08	3.84319e-08	4.35516e-08	3.52646e-08	3.02038e-08	3.50986e-08	3.0998e-08	2.94087e-08	2.94962e-08	3.36689e-08	3.02127e-08	3.02127e-08	3.02127e-08	3.01637e-08
	Chad	0.862021	0.860626	0.854634	0.864799	0.860423	0.86226	0.864305	0.850466	0.849651	0.841906	0.830011	0.826277	0.824229	0.824043	0.821762	0.824525	0.823798	0.822419	0.819085	0.812734	0.812288	0.812106	0.806315	0.800831	0.804952	0.797886	0.799453	0.800444	0.79689	0.780433	0.777474	0.781963		4.07489e-09	4.15794e-09	4.05976e-09	3.84492e-09	3.7736e-09	3.60246e-09	4.01471e-09	4.57138e-09	4.4489e-09	4.29421e-09	4.58978e-09	4.48706e-09	4.43644e-09	4.67925e-09	4.78703e-09
	Sao Tome and Principe	NA	NA	NA	NA	NA	NA	NA	NA	NA	NA	NA	NA	NA	NA	1.12449	1.12471	1.12461	1.12323	1.12175	1.11875	0.564154	1.11904	1.11478	1.11546	1.11202	1.10934	1.10653	0.831786	0.741157	0.740588	0.736625	0.734022		NA	NA	NA	NA	NA	NA	NA	NA	NA	NA	NA	NA	NA	NA	5.53789e-08
	Egypt	0.39386	0.4249	0.402828	0.460469	0.551103	0.62434	0.633789	0.64526	0.64622	0.654979	0.610839	0.632928	0.633155	0.601525	0.600794	0.604337	0.601231	0.611611	0.632152	0.585979	0.611705	0.612673	0.628526	0.629574	0.654511	0.655815	0.663707	0.658586	0.669222	0.685589	0.686378	0.671204		2.19325e-09	2.30848e-09	2.23582e-09	2.45524e-09	2.78883e-09	3.05728e-09	3.09044e-09	3.14004e-09	3.14533e-09	3.17832e-09	3.57662e-09	3.88874e-09	4.02266e-09	4.24672e-09	4.37069e-09
	Congo	0.331192	0.309727	0.104112	0.00921284	0.00921284	0.00921284	0.00921284	0.00921284	0.00921284	0.00921284	0.00921284	0.00921284	0.00921284	0.00921284	0.00921284	0.00921284	0.00921284	0.00921284	0.00921284	0.00921284	0.00921284	0.00921284	0.00921284	0.127837	0.151562	0.15947	0.134264	0.124299	0.148133	0.286268	0.174474	0.0744475		1.20682e-09	1.18204e-09	9.44611e-10	8.3503e-10	8.3503e-10	8.3503e-10	8.3503e-10	8.3503e-10	8.3503e-10	8.3503e-10	8.3503e-10	8.3503e-10	8.3503e-10	8.3503e-10	8.3503e-10
	Ethiopia	0.248685	0.237962	0.216324	0.194144	0.172142	0.15264	0.124303	0.182904	0.172423	0.17313	0.0925486	0.0918542	0.0762697	0.122694	0.0659532	0.027995	0.0327826	0.0318931	0.0321644	0.0151975	0.0201406	0.0137661	0.018139	0.013202	0.012819	0.0124212	0.00921284	0.0478503	0.114138	0.104034	0.0129992	0.0593738		1.11155e-09	1.09917e-09	1.07418e-09	1.04857e-09	1.02317e-09	1.00065e-09	9.67926e-10	1.03559e-09	1.02349e-09	1.02431e-09	9.31259e-10	9.30457e-10	9.12461e-10	9.66067e-10	9.00549e-10
	Réunion	0.111026	0.0386772	0.00921284	0.127916	0.232989	0.151639	0.198961	0.246285	0.499636	0.424818	0.432884	0.592568	0.60543	0.60557	0.613754	0.645243	0.500847	0.556745	0.453001	0.455254	0.45545	0.455418	0.458125	0.455921	0.465158	0.4719	0.480675	0.460723	0.36443	0.365798	0.362678	0.360629		5.82539e-09	2.28401e-09	8.3503e-10	6.63449e-09	1.1809e-08	7.83356e-09	1.01392e-08	1.24275e-08	2.48707e-08	2.12424e-08	2.16329e-08	2.95804e-08	3.01045e-08	3.01362e-08	3.04008e-08
	Gambia	1.12915	1.12886	1.12846	1.12502	1.12809	1.12827	1.12873	1.12684	1.12799	1.12705	1.12616	1.1283	1.12712	1.12738	1.12449	1.12471	1.12461	1.12323	1.12175	1.11875	1.1191	1.11904	1.11478	1.11546	1.11202	1.10934	1.10653	1.10598	1.10713	1.10628	1.10033	1.09643		5.5729e-08	5.58963e-08	5.58208e-08	5.53499e-08	5.57046e-08	5.58235e-08	5.57297e-08	5.54854e-08	5.56665e-08	5.57238e-08	5.56658e-08	5.59791e-08	5.57154e-08	5.57747e-08	5.53789e-08
	Libyan Arab Jamahiriya	0.910755	0.910755	0.910755	0.910755	0.910755	0.910755	0.910755	0.910755	0.910755	0.910755	0.910755	0.910755	0.910755	0.910755	0.910755	0.867358	0.865038	0.868482	0.871319	0.867113	0.868951	0.868749	0.870499	0.871971	0.873907	0.856662	0.832922	0.82516	0.832661	0.837882	0.821497	0.803464		1.87605e-09	1.87605e-09	1.87605e-09	1.87605e-09	1.87605e-09	1.87605e-09	1.87605e-09	1.87605e-09	1.87605e-09	1.87605e-09	1.87605e-09	1.87605e-09	1.87605e-09	1.87605e-09	1.87605e-09
	Cape Verde	1.12915	1.12886	1.12846	1.12502	1.12809	1.12827	1.12873	1.12684	1.12799	1.12705	1.12616	1.1283	1.12712	1.12738	1.12449	1.12471	1.12461	1.12323	1.12175	1.11875	1.1191	1.11904	1.11478	1.11546	1.11202	1.10934	1.10653	1.10598	1.10713	1.10628	1.10033	1.09643		5.5729e-08	5.58963e-08	5.58208e-08	5.53499e-08	5.57046e-08	5.58235e-08	5.57297e-08	5.54854e-08	5.56665e-08	5.57238e-08	5.56658e-08	5.59791e-08	5.57154e-08	5.57747e-08	5.53789e-08
	Burkina Faso	1.12915	1.12886	1.12846	1.12502	1.12809	1.12827	1.12873	1.12684	1.12799	1.12705	1.12616	1.06247	1.00945	0.891978	0.734141	0.668371	0.633837	0.669368	0.86216	0.727146	0.796871	0.945628	0.930522	0.883918	0.877382	0.903069	0.95291	0.89797	0.861045	0.890187	0.904907	0.920553		5.5729e-08	5.58963e-08	5.58208e-08	5.53499e-08	5.57046e-08	5.58235e-08	5.57297e-08	5.54854e-08	5.56665e-08	5.57238e-08	5.56658e-08	5.27354e-08	4.99385e-08	4.42085e-08	3.62885e-08
	Angola	0.379847	0.379847	0.364366	0.380436	0.380436	0.380436	0.359812	0.364867	0.364867	0.364867	0.358949	0.358949	0.326161	0.314246	0.314246	0.311969	0.31192	0.323386	0.289825	0.295749	0.331192	0.340159	0.314999	0.3379	0.195311	0.184881	0.176682	0.20158	0.182947	0.311033	0.29326	0.278713		1.263e-09	1.263e-09	1.24513e-09	1.26368e-09	1.26368e-09	1.26368e-09	1.23987e-09	1.24571e-09	1.24571e-09	1.24571e-09	1.23887e-09	1.23887e-09	1.20101e-09	1.18725e-09	1.18725e-09
	Somalia	1.12915	1.12886	1.12846	1.12502	1.12809	1.12827	1.12873	1.12684	1.12799	1.12705	1.12616	1.1283	1.12712	1.12738	1.12449	1.12471	1.12461	1.12323	1.12175	1.11875	1.1191	1.11904	1.11478	1.07449	1.07118	1.07005	1.06734	1.06942	1.07053	1.10628	1.10033	1.09643		5.5729e-08	5.58963e-08	5.58208e-08	5.53499e-08	5.57046e-08	5.58235e-08	5.57297e-08	5.54854e-08	5.56665e-08	5.57238e-08	5.56658e-08	5.59791e-08	5.57154e-08	5.57747e-08	5.53789e-08
	Namibia	NA	NA	NA	NA	NA	NA	NA	NA	NA	NA	NA	NA	NA	NA	NA	0.036973	0.0447687	0.057515	0.0299175	0.0338159	0.0338644	0.00921284	0.00921284	0.0165982	0.00921284	0.0290762	0.0755889	0.0903818	0.0810976	0.204838	0.173967	0.10215		NA	NA	NA	NA	NA	NA	NA	NA	NA	NA	NA	NA	NA	NA	NA
	Mozambique	0.0205333	0.0566792	0.0614967	0.0429889	0.217816	0.5675	0.8277	0.908743	0.839651	0.802998	0.369475	0.306767	0.215018	0.112138	0.0563166	0.0551088	0.0481035	0.0273339	0.0210452	0.0115374	0.0101468	0.0122499	0.0113166	0.0116765	0.0122242	0.0104874	0.00977891	0.00968737	0.00969759	0.00964504	0.0096501	0.00965201		1.16799e-09	2.29726e-09	2.30415e-09	1.8738e-09	7.20549e-09	2.04265e-08	2.52846e-08	2.82908e-08	2.78587e-08	2.51422e-08	8.99113e-09	1.00356e-08	7.26823e-09	2.97926e-09	8.9775e-10
	Ghana	0.0143159	0.0159158	0.0164541	0.0299379	0.0569135	0.0327058	0.0233944	0.0091142	0.00911806	0.00914211	0.00914819	0.00915253	0.00917071	0.0121024	0.0121931	0.0107055	0.0119573	0.0131844	0.0073976	0.00808894	0.00847426	0.00781478	0.00646196	0.00617405	0.00810979	0.00771662	0.00624676	0.00504383	0.00694646	0.166401	0.1202	0.0676142		8.40923e-10	8.4277e-10	8.43392e-10	8.58962e-10	8.90111e-10	8.62158e-10	8.51406e-10	8.2609e-10	8.2644e-10	8.28619e-10	8.29171e-10	8.29564e-10	8.31212e-10	8.38367e-10	8.38472e-10
	Sierra Leone	1.12915	1.12886	1.12846	1.12502	1.12809	1.12827	1.12873	1.12684	1.12799	1.12705	1.12616	1.1283	1.12712	1.12738	1.12449	1.12471	1.12461	1.12323	1.12175	1.11875	0.98036	1.02655	1.03581	1.02327	1.00174	0.952182	1.10653	0.831786	0.741157	0.496796	0.320961	0.2381		5.5729e-08	5.58963e-08	5.58208e-08	5.53499e-08	5.57046e-08	5.58235e-08	5.57297e-08	5.54854e-08	5.56665e-08	5.57238e-08	5.56658e-08	5.59791e-08	5.57154e-08	5.57747e-08	5.53789e-08
	Cameroon	0.0596487	0.0523718	0.0517384	0.0480352	0.0422969	0.0396446	0.0284766	0.0321334	0.0305091	0.0295484	0.0295484	0.0292471	0.032673	0.032673	0.0323293	0.0349712	0.0339975	0.0179657	0.0207711	0.0173348	0.017098	0.0247121	0.039633	0.043983	0.0470553	0.0572646	0.118304	0.213904	0.205092	0.232331	0.215818	0.200015		8.93269e-10	8.84866e-10	8.84135e-10	8.79859e-10	8.73233e-10	8.7017e-10	8.57274e-10	8.61497e-10	8.59621e-10	8.58512e-10	8.58512e-10	8.58164e-10	8.6212e-10	8.6212e-10	8.61723e-10
	Tunisia	0.837738	0.836064	0.829094	0.842315	0.785207	0.754742	0.822723	0.767622	0.801879	0.810113	0.782479	0.82643	0.799294	0.806053	0.76259	0.74409	0.739479	0.743031	0.737426	0.737685	0.736636	0.734384	0.734391	0.725153	0.725005	0.726294	0.740837	0.747099	0.737921	0.718946	0.711914	0.711541		3.38402e-09	3.43479e-09	3.52854e-09	3.25933e-09	4.41213e-09	4.90386e-09	3.61985e-09	4.59885e-09	4.18429e-09	4.04758e-09	4.65053e-09	3.40759e-09	4.20733e-09	4.05726e-09	5.13598e-09
	United Republic of Tanzania	0.26572	0.268673	0.266636	0.267481	0.261763	0.249668	0.267481	0.249376	0.206034	0.152171	0.136597	0.132116	0.12971	0.133684	0.171726	0.228243	0.169502	0.197299	0.21631	0.131842	0.189714	0.0856108	0.0733676	0.066967	0.156324	0.464534	0.538564	0.285341	0.285434	0.245894	0.285175	0.314575		1.2228e-09	1.22715e-09	1.22415e-09	1.22539e-09	1.21697e-09	1.19914e-09	1.22539e-09	1.19871e-09	1.13483e-09	1.05544e-09	1.03248e-09	1.02588e-09	1.02233e-09	1.6271e-09	2.27937e-09
	Zimbabwe	0.134982	0.111422	0.154786	0.189146	0.283338	0.449574	0.552472	0.784004	0.773523	0.712298	0.688351	0.70168	0.749261	0.877897	0.892972	0.87278	0.801718	0.806775	0.814183	0.660271	0.602736	0.703806	0.627661	0.441322	0.487457	0.48717	0.561017	0.525617	0.525366	0.561473	0.561395	0.561336		7.30472e-09	6.09278e-09	8.32346e-09	1.0091e-08	1.49363e-08	2.34877e-08	2.87809e-08	4.06911e-08	4.0152e-08	3.70025e-08	3.57707e-08	3.64563e-08	3.89039e-08	4.55211e-08	4.62966e-08
	Gabon	0.459984	0.278094	0.234598	0.225075	0.208255	0.2024	0.2024	0.2024	0.2024	0.175931	0.23686	0.238987	0.249508	0.270853	0.239159	0.258149	0.288011	0.287601	0.304896	0.298829	0.31243	0.291319	0.296628	0.324447	0.340274	0.396339	0.350693	0.452332	0.414794	0.405002	0.433889	0.466488		1.35554e-09	1.14551e-09	1.09528e-09	1.08429e-09	1.06487e-09	1.05811e-09	1.05811e-09	1.05811e-09	1.05811e-09	1.50463e-09	1.88289e-09	1.92683e-09	1.9896e-09	2.07346e-09	2.17983e-09
	Guinea-Bissau	1.12915	1.12886	1.12846	1.12502	1.12809	1.12827	1.12873	1.12684	1.12799	1.12705	1.12616	1.1283	1.12712	1.12738	1.12449	1.12471	1.12461	1.12323	1.12175	1.11875	1.1191	1.11904	1.11478	1.11546	1.11202	1.10934	1.10653	1.10598	1.10713	1.10628	1.10033	1.09643		5.5729e-08	5.58963e-08	5.58208e-08	5.53499e-08	5.57046e-08	5.58235e-08	5.57297e-08	5.54854e-08	5.56665e-08	5.57238e-08	5.56658e-08	5.59791e-08	5.57154e-08	5.57747e-08	5.53789e-08
	Algeria	0.71797	0.709604	0.706308	0.725526	0.70566	0.699232	0.723815	0.709948	0.726237	0.721378	0.72446	0.715804	0.720431	0.713131	0.721315	0.71908	0.722254	0.725033	0.719827	0.719326	0.724533	0.724068	0.722973	0.718001	0.718604	0.712212	0.719773	0.71982	0.718713	0.716698	0.72142	0.72503		5.5155e-09	5.46548e-09	5.40712e-09	5.60384e-09	5.5274e-09	5.54312e-09	5.73561e-09	5.66294e-09	5.82945e-09	5.82769e-09	5.96156e-09	5.96039e-09	6.00038e-09	6.00325e-09	6.03422e-09
	Liberia	0.694354	0.689504	0.675095	0.67305	0.771349	0.739711	0.678015	0.682655	0.674815	0.682781	1.12616	1.1283	1.12712	1.12738	1.12449	1.12471	1.12461	1.12323	1.12175	1.11875	1.1191	1.11904	1.11478	1.11546	1.11202	1.10934	1.10653	1.10598	1.10713	1.10628	1.10033	1.09643		3.44172e-08	3.429e-08	3.35481e-08	3.32679e-08	3.821e-08	3.67303e-08	3.36292e-08	3.37654e-08	3.34563e-08	3.39091e-08	5.56658e-08	5.59791e-08	5.57154e-08	5.57747e-08	5.53789e-08
	Eritrea	NA	NA	NA	NA	NA	NA	NA	NA	NA	NA	NA	NA	NA	NA	0.910755	0.910755	0.910755	0.910755	0.910755	0.910755	0.910755	0.910755	0.910755	0.910755	0.910755	0.910755	0.910755	0.910755	0.910755	0.910755	0.910755	0.910755		NA	NA	NA	NA	NA	NA	NA	NA	NA	NA	NA	NA	NA	NA	1.87605e-09
	Djibouti	1.12915	1.12886	1.12846	1.12502	1.12809	1.12827	1.12873	1.12684	1.12799	1.12705	1.12616	1.1283	1.12712	1.12738	1.12449	1.12471	1.12461	1.12323	1.12175	1.11875	1.1191	1.11904	1.11478	1.11546	1.11202	1.10934	1.10653	1.10598	1.10713	1.10628	1.10033	1.09643		5.5729e-08	5.58963e-08	5.58208e-08	5.53499e-08	5.57046e-08	5.58235e-08	5.57297e-08	5.54854e-08	5.56665e-08	5.57238e-08	5.56658e-08	5.59791e-08	5.57154e-08	5.57747e-08	5.53789e-08
	Uganda	0.00921284	0.00921284	0.00921284	0.00921284	0.00921284	0.00921284	0.00921284	0.00921284	0.00921284	0.00921284	0.00921284	0.00921284	0.00921284	0.00921284	0.00921284	0.00921284	0.0192615	0.0181249	0.0180425	0.00921284	0.00921284	0.00921284	0.00921284	0.00921284	0.00921284	0.0441376	0.263559	0.299362	0.28621	0.300424	0.320389	0.337189		8.3503e-10	8.3503e-10	8.3503e-10	8.3503e-10	8.3503e-10	8.3503e-10	8.3503e-10	8.3503e-10	8.3503e-10	8.3503e-10	8.3503e-10	8.3503e-10	8.3503e-10	8.3503e-10	8.3503e-10
	Kenya	0.116446	0.0577906	0.0404955	0.101826	0.108885	0.0782435	-0.0139304	0.0066997	-0.0153931	-0.0435203	-0.0138659	-0.03231	-0.0400644	-0.039966	-0.0211296	0.0279254	0.0250252	0.0886596	0.102489	0.233414	0.40044	0.235079	0.12007	0.0820809	0.163368	0.181859	0.199257	0.19085	0.266046	0.337494	0.221835	0.125622		-3.11388e-09	-2.47497e-09	-2.38324e-09	-1.24675e-09	-1.47914e-09	-1.20563e-09	-1.37375e-09	-1.36666e-09	-1.24076e-09	-1.38187e-09	-1.34222e-09	-1.34998e-09	-1.58273e-09	-1.45554e-09	-1.37578e-09
	Côte d'Ivoire	0.200128	0.0770708	0.0941749	0.428111	0.700005	0.294394	0.383353	0.448523	0.415313	0.448899	0.380436	0.293124	0.347974	0.449302	0.473186	0.364162	0.335572	0.393359	0.488986	0.463281	0.451198	0.450296	0.480403	0.456189	0.482755	0.530066	0.520123	0.481581	0.47521	0.416317	0.485299	0.549127		1.05548e-09	9.13386e-10	9.33137e-10	1.31873e-09	1.63269e-09	1.16433e-09	1.26705e-09	1.34231e-09	1.30396e-09	1.34274e-09	1.26368e-09	1.16286e-09	1.2262e-09	1.3432e-09	1.37078e-09
	Equatorial Guinea	1.12915	1.12886	1.12846	1.12502	1.12809	1.12827	1.12873	1.12684	1.12799	1.12705	1.12616	1.1283	1.12712	1.12738	1.12449	1.12471	1.12461	1.12323	1.12175	1.11875	1.1191	1.11904	1.11478	1.11546	1.11202	1.10934	1.10653	1.10598	1.10713	1.10628	1.10033	1.09643		5.5729e-08	5.58963e-08	5.58208e-08	5.53499e-08	5.57046e-08	5.58235e-08	5.57297e-08	5.54854e-08	5.56665e-08	5.57238e-08	5.56658e-08	5.59791e-08	5.57154e-08	5.57747e-08	5.53789e-08
	Seychelles	1.12915	1.12886	1.12846	1.12502	1.12809	1.12827	1.12873	1.12684	1.12799	1.12705	1.12616	1.1283	1.12712	1.12738	1.12449	1.12471	1.12461	1.12323	1.12175	1.11875	1.1191	1.11904	1.11478	1.11546	1.11202	1.10934	1.10653	1.10598	1.10713	1.10628	1.10033	1.09643		5.5729e-08	5.58963e-08	5.58208e-08	5.53499e-08	5.57046e-08	5.58235e-08	5.57297e-08	5.54854e-08	5.56665e-08	5.57238e-08	5.56658e-08	5.59791e-08	5.57154e-08	5.57747e-08	5.53789e-08
	Malawi	0.0379293	0.0666306	0.0625104	0.0340086	0.0330188	0.0325266	0.0311641	0.0291705	0.0288405	0.028824	0.0251693	0.024134	0.0237311	0.221077	0.21199	0.208015	0.196953	0.193079	0.180373	0.192527	0.175695	0.172958	0.173321	0.153876	0.154722	0.154925	0.159826	0.145497	0.16513	0.148522	0.142141	0.136496		2.24257e-09	3.65869e-09	3.4534e-09	2.04647e-09	2.00247e-09	1.98062e-09	1.9114e-09	1.81093e-09	1.79699e-09	1.79799e-09	1.61833e-09	1.57029e-09	1.54776e-09	1.12447e-08	1.07521e-08
	Togo	0.234598	0.234598	0.266796	0.685369	0.459984	0.279675	0.209555	0.279675	0.337046	0.234598	0.331192	0.276336	0.36983	0.241869	0.36199	0.227768	0.298994	0.459984	0.36339	0.242946	0.403637	0.582921	0.395588	0.274372	0.4865	0.539532	0.505061	0.433468	0.234598	0.17313	0.17313	0.17313		1.09528e-09	1.09528e-09	1.13246e-09	1.61579e-09	1.35554e-09	1.14734e-09	1.06637e-09	1.14734e-09	1.21358e-09	1.09528e-09	1.20682e-09	1.14348e-09	1.25144e-09	1.10368e-09	1.24238e-09
	Rwanda	0.00921284	0.00921284	0.00921284	0.00921284	0.00921284	0.00921284	0.00921284	0.00921284	0.00921284	0.00921284	0.00921284	0.00921284	0.00921284	0.00921284	0.00921284	0.00921284	0.00921284	0.00921284	0.00921284	0.00921284	0.00921284	0.00921284	0.00921284	0.00921284	0.00921284	0.49816	0.832204	0.886624	0.680162	0.67699	0.671677	0.66813		8.3503e-10	8.3503e-10	8.3503e-10	8.3503e-10	8.3503e-10	8.3503e-10	8.3503e-10	8.3503e-10	8.3503e-10	8.3503e-10	8.3503e-10	8.3503e-10	8.3503e-10	8.3503e-10	8.3503e-10
	Lesotho	NA	NA	NA	NA	NA	NA	NA	NA	NA	NA	NA	NA	NA	NA	NA	NA	NA	NA	NA	0.00921284	0.00921284	0.00921284	0.00921284	0.00921284	0.00921284	0.00921284	0.00921284	0.00921284	0.00921284	0.00921284	0.00921284	0.00921284		NA	NA	NA	NA	NA	NA	NA	NA	NA	NA	NA	NA	NA	NA	NA
	Madagascar	0.746736	0.719232	0.542189	0.5164	0.532945	0.533028	0.509422	0.46102	0.443025	0.47322	0.467961	0.468839	0.460298	0.460404	0.459235	0.455412	0.414813	0.396695	0.38006	0.38386	0.350715	0.455694	0.433444	0.438165	0.474618	0.475034	0.494753	0.44606	0.496192	0.455173	0.460088	0.466025		3.69847e-08	3.5752e-08	2.70187e-08	2.56145e-08	2.65187e-08	2.65743e-08	2.53624e-08	2.29277e-08	2.20962e-08	2.36191e-08	2.33548e-08	2.34835e-08	2.29797e-08	2.30037e-08	2.28439e-08
	Central African Republic	0.00921284	0.00921284	0.00921284	0.00921284	0.00921284	0.169079	0.149152	0.148916	0.14906	0.148942	0.148832	0.149099	0.148951	0.148984	0.257051	0.232312	0.232293	0.232015	0.231721	0.231119	0.231189	0.231178	0.230327	0.230462	0.229775	0.209237	0.1921	0.165893	0.155602	0.155488	0.154695	0.154175		8.3503e-10	8.3503e-10	8.3503e-10	8.3503e-10	8.3503e-10	8.69053e-09	7.69686e-09	7.66633e-09	7.68896e-09	7.69613e-09	7.68888e-09	7.72805e-09	7.69507e-09	7.70249e-09	1.29559e-08
	Benin	NA	NA	NA	NA	NA	NA	NA	NA	NA	NA	0.910755	0.910755	0.910755	0.910755	0.910755	0.910755	0.910755	0.910755	0.910755	0.910755	0.910755	0.910755	0.910755	0.910755	0.910755	0.910755	0.910755	0.910755	0.910755	0.910755	0.910755	0.910755		NA	NA	NA	NA	NA	NA	NA	NA	NA	NA	1.87605e-09	1.87605e-09	1.87605e-09	1.87605e-09	1.87605e-09
	South Africa	1.1089	1.10359	1.11068	1.11494	1.0817	1.07135	1.03717	1.06005	1.01858	1.02069	1.05354	1.04311	1.0499	1.0705	1.05083	1.04628	1.04245	1.03567	1.03011	1.0389	1.03589	1.04484	1.03929	1.04937	1.0438	1.0523	1.0573	1.06081	1.05978	1.04882	1.04941	1.05001		6.52459e-08	6.49417e-08	6.53616e-08	6.5601e-08	6.37084e-08	6.31234e-08	6.11631e-08	6.2467e-08	6.0082e-08	6.02302e-08	6.21249e-08	6.15184e-08	6.1921e-08	6.31021e-08	6.18687e-08
	Nigeria	0.47155	0.543516	0.54764	0.588406	0.538919	0.542494	0.540473	0.542803	0.503854	0.51577	0.488579	0.435595	0.448147	0.463534	0.477836	0.475407	0.487371	0.483669	0.460685	0.45713	0.436963	0.453024	0.480058	0.459916	0.497164	0.496637	0.536205	0.536354	0.536653	0.574996	0.561091	0.561145		3.33771e-09	3.94655e-09	3.81923e-09	4.43956e-09	3.95775e-09	3.84436e-09	3.55931e-09	3.78194e-09	3.54643e-09	3.73101e-09	3.77459e-09	3.46334e-09	3.40208e-09	3.52367e-09	3.77182e-09
	Guinea	0.681178	0.693441	0.693198	0.684572	0.755134	0.739035	0.747617	0.746372	0.755065	0.739228	0.738651	0.740046	0.739275	0.724841	0.722988	0.717125	0.717063	0.611875	0.591972	0.517749	0.510941	0.467619	0.453721	0.607886	0.471681	0.502375	0.511601	0.480939	0.512425	0.517326	0.520674	0.524798		3.37714e-08	3.44836e-08	3.44374e-08	3.38309e-08	3.74148e-08	3.66971e-08	3.70422e-08	3.6881e-08	3.73893e-08	3.66808e-08	3.66429e-08	3.68475e-08	3.66752e-08	3.59964e-08	3.57431e-08
	Mauritius	0.920794	0.995567	0.888623	1.04718	0.975519	0.848508	0.900257	0.862674	0.960174	0.882522	1.00031	1.02787	0.985776	1.00715	1.04316	0.986602	1.03088	1.04669	1.04449	0.690466	0.560777	0.56676	0.583908	0.59726	0.592296	0.628871	0.664231	0.661961	0.654284	0.564463	0.528973	0.518628		4.55162e-08	4.93414e-08	4.40381e-08	5.15465e-08	4.82224e-08	4.20764e-08	4.45267e-08	4.2568e-08	4.74418e-08	4.37169e-08	4.94877e-08	5.10303e-08	4.87765e-08	4.98672e-08	5.14017e-08
	Botswana	1.09887	1.09887	1.10807	1.11762	1.12455	1.14003	1.13125	1.13812	1.11417	1.1199	1.12271	1.14291	1.14498	1.14369	1.14476	1.14655	1.14568	1.14387	1.14628	1.14564	1.14454	1.14568	1.14361	1.14176	1.13581	1.14973	1.14955	1.14921	1.1514	1.1514	1.1514	1.1514		4.69923e-08	4.69923e-08	4.91974e-08	5.1488e-08	5.31507e-08	5.68647e-08	5.47567e-08	5.64053e-08	5.06618e-08	5.20358e-08	5.27105e-08	5.75534e-08	5.805e-08	5.77419e-08	5.7999e-08
	Morocco	0.685043	0.788308	0.865116	0.891995	0.904158	0.88516	0.898732	0.897223	0.88259	0.843436	0.848676	0.830787	0.858561	0.930625	0.89956	0.98477	0.883829	0.882547	0.932499	0.984223	1.0216	1.03275	1.03263	0.993743	0.992479	1.00133	0.992019	0.98123	0.964971	0.875966	0.822044	0.767745		1.26032e-08	1.35525e-08	1.2224e-08	1.35323e-08	1.22853e-08	1.07575e-08	1.73686e-08	2.15161e-08	1.85211e-08	1.43208e-08	1.49512e-08	1.30143e-08	1.16261e-08	1.65693e-08	1.64636e-08
	Zambia	0.0274387	0.0226454	0.0202159	0.0212809	0.0215269	0.019286	0.0204629	0.0209499	0.021249	0.02002	0.0159797	0.0173753	0.0161083	0.0161626	0.0143809	0.01531	0.0147595	0.015624	0.017096	0.0142524	0.0142542	0.0141746	0.0140453	0.0139731	0.013793	0.014723	0.0139682	0.0110844	0.0111117	0.0118656	0.0116298	0.0114518		1.4517e-09	1.20219e-09	1.11168e-09	1.16005e-09	1.18012e-09	1.0883e-09	1.11789e-09	1.10348e-09	1.15699e-09	1.20206e-09	1.07504e-09	1.13104e-09	1.09335e-09	1.10636e-09	9.56693e-10
	Senegal	0.910755	0.910755	0.910755	0.910755	0.910755	0.910755	0.910755	0.910523	0.904913	0.904462	0.906102	0.907253	0.908863	0.901343	0.897929	0.879351	0.88356	0.896806	0.899367	0.907504	0.910491	0.910755	0.809814	0.744309	0.771352	0.799763	0.813571	0.843755	0.816763	0.783746	0.785415	0.786922		1.87605e-09	1.87605e-09	1.87605e-09	1.87605e-09	1.87605e-09	1.87605e-09	1.87605e-09	1.88136e-09	2.01e-09	2.02035e-09	1.98273e-09	1.95634e-09	1.91943e-09	2.09186e-09	2.17016e-09
	Mauritania	0.648819	0.576822	0.572827	0.579604	0.576686	0.606346	0.769295	0.682215	0.696844	0.690507	0.693212	0.700575	0.698842	0.698685	0.696755	0.715817	0.721975	0.686885	0.729099	0.692206	0.702778	0.711744	0.710663	0.698687	0.708499	0.710256	0.69814	0.703952	0.686982	0.660948	0.654997	0.655094		3.26493e-09	3.0503e-09	2.98485e-09	2.84162e-09	2.79408e-09	2.77223e-09	3.66141e-09	3.82411e-09	3.79183e-09	3.66527e-09	3.96399e-09	3.92521e-09	3.88238e-09	4.08783e-09	4.17903e-09
	Burundi	NA	NA	NA	0.00921284	0.00921284	0.00921284	0.00921284	0.00921284	0.00921284	0.00921284	0.00921284	0.00921284	0.00921284	0.00921284	0.00921284	0.00921284	0.00921284	0.00921284	0.00921284	0.00921284	0.00921284	0.00921284	0.00921284	0.00921284	0.00921284	0.00921284	0.00921284	0.00921284	0.00921284	0.00921284	0.00921284	0.00921284		NA	NA	NA	8.3503e-10	8.3503e-10	8.3503e-10	8.3503e-10	8.3503e-10	8.3503e-10	8.3503e-10	8.3503e-10	8.3503e-10	8.3503e-10	8.3503e-10	8.3503e-10
	Sudan	0.270529	0.210621	0.232367	0.232367	0.284684	0.259641	0.259641	0.259641	0.264768	0.262771	0.33031	0.336022	0.300217	0.313414	0.354804	0.427246	0.430536	0.457806	0.453322	0.450311	0.483709	0.496443	0.523944	0.587772	0.612973	0.604477	0.628369	0.641047	0.663003	0.363237	0.335798	0.312157		1.13677e-09	1.0676e-09	1.09271e-09	1.09271e-09	1.15312e-09	1.1242e-09	1.1242e-09	1.1242e-09	1.13012e-09	1.12782e-09	1.2058e-09	1.2124e-09	1.17105e-09	1.18629e-09	1.23409e-09
Asia and Oceania	Afghanistan	0.271579	0.30311	0.283468	0.280978	0.287405	0.282462	0.411325	0.420778	0.342804	0.338784	0.343389	0.336805	0.338251	0.327707	0.332094	0.345419	0.361114	0.377689	0.375226	0.35821	0.352309	0.17226	0.209874	0.344995	0.386737	0.38942	0.398075	0.406762	0.341112	0.101346	0.0940131	0.0883191		1.23398e-08	1.39316e-08	1.29598e-08	1.28128e-08	1.32568e-08	1.31318e-08	1.90004e-08	1.95059e-08	1.59549e-08	1.57454e-08	1.57663e-08	1.54689e-08	1.53397e-08	1.49253e-08	1.50765e-08
	Fiji	0.977244	0.979739	0.984583	0.858829	0.24851	0.245472	0.0859925	0.0598314	0.0861983	0.108811	0.0970234	0.116647	0.0979977	0.117754	0.148719	0.143693	0.144095	0.157159	0.163135	0.185189	0.180439	0.181211	0.212018	0.418549	0.40781	0.484745	0.519312	0.310807	0.330317	0.379427	0.480345	0.408492		2.31008e-08	2.375e-08	2.53355e-08	2.34411e-08	7.76038e-09	8.43128e-09	3.34747e-09	2.55229e-09	3.4043e-09	4.1464e-09	4.03444e-09	4.80444e-09	4.22741e-09	5.04814e-09	6.28338e-09
	Philippines	0.6321	0.595046	0.578114	0.616482	0.511618	0.538927	0.519434	0.532109	0.517709	0.525932	0.526749	0.538043	0.560232	0.544787	0.563164	0.59699	0.612169	0.658718	0.667927	0.58041	0.619857	0.672888	0.640715	0.63399	0.638289	0.631113	0.599619	0.637694	0.609766	0.618275	0.69989	0.695703		3.0219e-09	3.08091e-09	4.22953e-09	4.77575e-09	6.21624e-09	1.21837e-08	1.13415e-08	8.64511e-09	8.95494e-09	8.57012e-09	7.27903e-09	7.43414e-09	7.10798e-09	7.32796e-09	5.59094e-09
	Sri Lanka	0.103239	0.147154	0.208082	0.380436	0.0741888	0.0314731	0.00921284	0.176544	0.0712755	0.0251976	0.00921284	0.0743845	0.0945323	0.0483103	0.0656899	0.0703343	0.25453	0.295903	0.279838	0.292726	0.467695	0.485604	0.55653	0.513025	0.574502	0.565193	0.497651	0.539007	0.495147	0.542423	0.426194	0.341558		9.43603e-10	9.94312e-10	1.06467e-09	1.26368e-09	9.10059e-10	8.60734e-10	8.3503e-10	1.02825e-09	9.06695e-10	8.53488e-10	8.3503e-10	9.10285e-10	9.33549e-10	8.80176e-10	9.00245e-10
	Solomon Islands	0.977244	0.979739	0.984583	0.989539	0.992989	1.00675	1.01405	1.01586	1.01542	1.01513	1.02135	1.02355	1.02789	1.03019	1.03043	1.03119	1.03336	1.03129	1.03373	1.0354	1.04048	1.04381	1.04466	1.05048	1.0544	1.06126	1.06601	1.06804	1.06933	1.07122	1.06902	1.07024		2.31008e-08	2.375e-08	2.53355e-08	2.6919e-08	2.93059e-08	3.29081e-08	3.45492e-08	3.5274e-08	3.49281e-08	3.47713e-08	3.68579e-08	3.73749e-08	3.81535e-08	3.88371e-08	3.93452e-08
	China	1.04656	1.02413	1.00882	0.987296	1.01258	1.02921	1.05275	1.06575	1.0686	1.06601	1.06882	1.09674	1.11182	1.09905	1.08648	1.07436	1.09282	1.09739	1.09191	1.0989	1.11032	1.08475	1.09759	1.12208	1.10644	1.11009	1.12206	1.14347	1.11347	1.09242	1.06819	1.0864		1.10873e-08	1.09795e-08	1.1195e-08	1.12222e-08	1.18061e-08	1.26425e-08	1.31897e-08	1.34751e-08	1.35165e-08	1.36201e-08	1.38691e-08	1.43082e-08	1.45913e-08	1.4328e-08	1.4539e-08
	Indonesia	0.926276	0.912801	0.942212	0.925634	0.925504	0.935519	0.953929	0.986394	0.964417	0.939851	0.971661	0.971715	0.940658	0.925034	0.831587	0.781913	0.791785	0.859495	0.824045	0.851414	0.881521	0.878905	0.924386	0.945289	0.962848	0.973642	0.991277	0.984423	0.96652	0.943353	0.906577	0.94983		2.01268e-09	1.99239e-09	2.06754e-09	2.09842e-09	2.10021e-09	6.93968e-09	5.08294e-08	5.66281e-08	5.64479e-08	6.14682e-08	5.88993e-08	5.82455e-08	5.42908e-08	4.64504e-08	4.80188e-08
	Samoa	0.977244	0.979739	0.740741	0.662763	0.665064	0.674238	0.511633	0.680308	0.680021	0.51217	0.515281	0.51638	0.620419	0.6218	0.621945	0.69053	0.59444	0.593257	0.649533	0.579317	0.653758	0.583988	0.479872	0.529845	0.531807	0.535236	0.537614	0.586755	0.587457	0.588487	0.587289	0.587954		2.31008e-08	2.375e-08	1.92104e-08	1.82243e-08	1.98156e-08	2.22171e-08	1.76921e-08	2.37944e-08	2.35637e-08	1.78031e-08	1.88464e-08	1.9105e-08	2.32261e-08	2.36363e-08	2.39411e-08
	Papua New Guinea	0.722931	0.728741	0.746688	0.715624	0.713904	0.72662	0.729664	0.761234	0.748718	0.74728	0.75343	0.755047	0.75824	0.759932	0.755718	0.452965	0.469776	0.572665	0.613032	0.538682	0.58869	0.673447	0.698258	0.723455	0.746711	0.692399	0.694955	0.676132	0.671744	0.681311	0.680256	0.681335		1.72513e-08	1.78237e-08	1.93598e-08	1.96308e-08	2.12291e-08	2.39013e-08	2.50075e-08	2.6563e-08	2.58914e-08	2.5735e-08	2.73224e-08	2.77026e-08	2.82751e-08	2.87777e-08	2.89857e-08
	Thailand	0.983249	0.846179	0.731542	0.759725	0.734743	0.751242	0.712567	0.733606	0.740926	0.737778	0.820159	0.840295	0.85337	0.846731	0.840151	0.814084	0.795312	0.797996	0.787113	0.762726	0.731974	0.709475	0.687805	0.676342	0.696189	0.692279	0.700035	0.69612	0.690418	0.701848	0.702185	0.713005		1.29019e-08	1.3971e-08	1.42185e-08	1.27334e-08	1.43834e-08	2.78328e-08	2.7114e-08	2.82699e-08	2.55957e-08	2.56645e-08	3.00742e-08	3.1024e-08	3.10451e-08	2.59397e-08	2.43234e-08
	Mongolia	0	0	0	0	0	1.13042	1.13424	1.13546	1.13477	1.13637	1.1331	1.13306	1.13873	1.13136	1.13815	1.1412	1.14071	1.14072	1.14114	1.14268	1.14442	1.14374	1.14474	1.14398	1.14345	1.14427	1.14388	1.14198	1.14211	1.14265	1.14179	1.1396		0	0	0	0	0	5.4559e-08	5.54742e-08	5.57673e-08	5.5602e-08	5.59852e-08	5.52007e-08	5.5191e-08	5.65528e-08	5.47845e-08	5.64119e-08
	Burma	0.395736	0.320673	0.336671	0.33542	0.372591	0.418175	0.418247	0.439818	0.445293	0.406383	0.394734	0.414333	0.369631	0.368263	0.401533	0.437065	0.421609	0.453244	0.56234	0.584786	0.474116	0.469128	0.449642	0.464452	0.437204	0.398903	0.382057	0.365907	0.313651	0.205393	0.26887	0.320989		2.95444e-09	2.8734e-09	2.99948e-09	3.0852e-09	3.22569e-09	3.80086e-09	4.16354e-09	3.85981e-09	4.20011e-09	4.15881e-09	3.93547e-09	4.10729e-09	3.07755e-09	3.18223e-09	3.63166e-09
	Australia	1.01818	1.00369	1.01232	1.037	1.04037	1.03849	1.02999	1.04924	1.05362	1.05422	1.07082	1.07252	1.07811	1.06993	1.07682	1.07591	1.08624	1.08526	1.09925	1.09036	1.09531	1.09859	1.06564	1.06486	1.0675	1.07563	1.07257	1.07536	1.07456	1.0426	1.01769	0.989239		1.16972e-07	1.13497e-07	1.13743e-07	1.17403e-07	1.17647e-07	1.19885e-07	1.18952e-07	1.23056e-07	1.2407e-07	1.24094e-07	1.26686e-07	1.29195e-07	1.30585e-07	1.2935e-07	1.30576e-07
	Viet Nam	0.753139	0.742663	0.744451	0.735305	0.746414	0.754011	0.751132	0.75414	0.775167	0.541477	0.396425	0.321466	0.246275	0.243732	0.245212	0.273355	0.283073	0.371672	0.445534	0.372952	0.402455	0.361042	0.429543	0.467723	0.510119	0.506356	0.576343	0.576603	0.553665	0.534467	0.600728	0.618361		2.91797e-08	2.75509e-08	2.71237e-08	2.49405e-08	2.74383e-08	2.78412e-08	2.78248e-08	2.83277e-08	3.02199e-08	2.12845e-08	1.41239e-08	9.57347e-09	5.86662e-09	4.43471e-09	5.94461e-09
	Pakistan	0.300429	0.312635	0.395103	0.378749	0.372152	0.419782	0.407584	0.408974	0.437276	0.45156	0.424012	0.429412	0.438214	0.464118	0.459176	0.456565	0.502216	0.520285	0.519301	0.579686	0.602649	0.575719	0.547076	0.489361	0.511581	0.49806	0.517047	0.541207	0.550124	0.554974	0.517928	0.50484		3.0856e-09	3.07099e-09	3.21571e-09	2.8824e-09	2.86597e-09	3.11751e-09	3.04832e-09	2.98493e-09	3.02388e-09	3.01112e-09	2.89639e-09	2.81483e-09	2.73236e-09	2.74568e-09	2.63455e-09
	Hong Kong Special Administrative Region (China)	0.910755	0.910755	0.963774	1.0399	1.07772	1.09824	1.11495	1.13961	1.14715	1.14432	1.14708	1.14284	1.14128	1.13933	1.14659	1.14451	1.07727	0.979239	1.00272	0.963984	0.981779	0.985821	0.996008	1.05618	1.0186	1.02408	1.01776	1.03651	1.01457	1.02596	0.988632	1.02771		1.87605e-09	1.87605e-09	1.45917e-08	3.28484e-08	4.19199e-08	4.6841e-08	5.08494e-08	5.67637e-08	5.8572e-08	5.78924e-08	5.85553e-08	5.75382e-08	5.71633e-08	5.66959e-08	5.84358e-08
	Japan	0.55478	0.554737	0.518714	0.518897	0.522815	0.496932	0.486753	0.48284	0.491082	0.501724	0.532595	0.526022	0.535786	0.509258	0.538326	0.517252	0.517429	0.503976	0.495628	0.516959	0.513767	0.517868	0.545475	0.575352	0.553397	0.551684	0.541261	0.586497	0.574631	0.546899	0.553851	0.635452		6.32312e-09	6.69999e-09	6.31266e-09	6.78412e-09	7.61543e-09	7.97609e-09	7.82048e-09	7.90183e-09	7.75818e-09	7.75053e-09	9.49016e-09	9.622e-09	9.91505e-09	1.0065e-08	1.06066e-08
	India	0.980073	1.00807	1.06787	1.05533	1.08207	1.15041	1.16838	1.26007	1.22549	1.2415	1.19673	1.22522	1.25069	1.27671	1.24567	1.29639	1.31018	1.28387	1.25821	1.26866	1.30262	1.30432	1.3317	1.30645	1.29753	1.26956	1.26398	1.25689	1.29717	1.30016	1.28779	1.26878		3.43188e-08	3.58537e-08	3.78907e-08	3.74568e-08	3.85097e-08	4.12851e-08	4.21032e-08	4.5547e-08	4.45558e-08	4.49928e-08	4.32259e-08	4.42776e-08	4.50871e-08	4.62217e-08	4.4893e-08
	Malaysia	1.18897	1.17927	1.21876	1.19036	1.0506	0.972217	0.93611	0.882485	0.858696	0.927398	1.01766	0.942349	0.900082	0.854184	0.793842	0.792047	0.809418	0.828795	0.760278	0.693725	0.674548	0.720198	0.773568	0.741514	0.784042	0.808735	0.809959	0.831286	0.81734	0.818827	0.868476	0.945345		2.5505e-09	2.5353e-09	2.59873e-09	2.55746e-09	2.33272e-09	2.29651e-09	2.2651e-09	2.19719e-09	3.05094e-09	9.08851e-09	1.1113e-08	1.12672e-08	1.03743e-08	9.05761e-09	8.04715e-09
	French Polynesia	0.977244	0.979739	0.984583	0.942856	0.883681	0.85712	0.863327	0.864859	0.796683	0.773707	0.787779	0.769964	0.722287	0.723897	0.733949	0.659561	0.629908	0.640496	0.568038	0.793944	0.741959	0.818896	0.7858	0.771567	0.758265	0.758128	0.736847	0.709668	0.731319	0.763389	0.800114	0.84171		2.31008e-08	2.375e-08	2.53355e-08	2.56769e-08	2.61425e-08	2.80971e-08	2.94921e-08	3.01082e-08	2.75165e-08	2.66266e-08	2.85449e-08	2.824e-08	2.6958e-08	2.74365e-08	2.81648e-08
	Vanuatu	0.977244	0.979739	0.984583	0.989539	0.992989	1.00675	1.01405	1.01586	1.01542	1.01513	1.02135	1.02355	1.02789	1.03019	1.03043	1.03119	1.03336	1.03129	1.03373	1.0354	1.04048	1.04381	1.04466	1.05048	1.0544	1.06126	1.06601	1.06804	1.06933	1.07122	1.06902	1.07024		2.31008e-08	2.375e-08	2.53355e-08	2.6919e-08	2.93059e-08	3.29081e-08	3.45492e-08	3.5274e-08	3.49281e-08	3.47713e-08	3.68579e-08	3.73749e-08	3.81535e-08	3.88371e-08	3.93452e-08
	Republic of Korea (South)	0.579574	0.584959	0.623039	0.617563	0.685337	0.672637	0.685597	0.672788	0.650121	0.641457	0.633265	0.626784	0.524496	0.540005	0.520426	0.511601	0.556203	0.588977	0.596783	0.497467	0.519469	0.525274	0.512803	0.488317	0.476035	0.466828	0.473886	0.419975	0.430726	0.66775	0.669486	0.665368		4.07074e-08	4.13298e-08	4.32063e-08	4.34442e-08	4.32052e-08	4.58289e-08	4.36065e-08	4.32037e-08	4.20013e-08	4.38585e-08	4.16949e-08	4.59328e-08	3.84998e-08	4.00544e-08	3.86051e-08
	Macao Special Administrative Region (China)	1.08149	1.08684	1.08338	1.0854	1.08988	1.0917	1.09109	1.09181	1.09086	1.08781	1.08054	1.07935	1.07467	1.07617	1.07472	1.07092	1.06492	1.07129	1.0615	1.0562	1.06138	1.05996	1.05882	1.05014	1.04741	1.04919	1.05358	1.05144	1.05232	1.04571	1.04802	1.05737		4.78545e-08	4.88558e-08	4.83237e-08	4.82669e-08	4.90889e-08	4.95491e-08	4.97086e-08	4.99476e-08	4.986e-08	4.96325e-08	4.87028e-08	4.86392e-08	4.78024e-08	4.80374e-08	4.78319e-08
	Tonga	NA	0.979739	0.984583	0.989539	0.992989	1.00675	1.01405	1.01586	1.01542	1.01513	1.02135	1.02355	1.02789	1.03019	1.03043	1.03119	1.03336	1.03129	1.03373	1.0354	1.04048	1.04381	1.04466	1.05048	1.0544	1.06126	1.06601	1.06804	1.06933	1.07122	1.06902	1.07024		NA	2.375e-08	2.53355e-08	2.6919e-08	2.93059e-08	3.29081e-08	3.45492e-08	3.5274e-08	3.49281e-08	3.47713e-08	3.68579e-08	3.73749e-08	3.81535e-08	3.88371e-08	3.93452e-08
	Kiribati	NA	NA	NA	NA	NA	NA	NA	NA	NA	NA	NA	NA	NA	NA	NA	NA	NA	1.03129	1.03373	1.0354	1.04048	1.04381	1.04466	1.05048	1.0544	1.06126	1.06601	1.06804	1.06933	1.07122	1.06902	1.07024		NA	NA	NA	NA	NA	NA	NA	NA	NA	NA	NA	NA	NA	NA	NA
	Brunei Darussalam	0.722448	0.721838	0.721571	0.721344	0.721243	0.721221	0.721943	0.721506	0.721443	0.722078	0.722015	0.722028	0.721851	0.72195	0.72183	0.72168	0.721662	0.72173	0.7219	0.721949	0.72195	0.721999	0.72199	0.721719	0.721919	0.721919	0.722017	0.722078	0.722063	0.722178	0.722136	0.72212		6.19413e-09	6.20813e-09	6.21426e-09	6.21945e-09	6.22178e-09	6.22226e-09	6.20572e-09	6.21573e-09	6.21717e-09	6.20262e-09	6.20407e-09	6.20376e-09	6.20782e-09	6.20556e-09	6.2083e-09
	Cook Islands	0.977244	0.979739	0.984583	0.989539	0.992989	1.00675	1.01405	1.01586	1.01542	1.01513	1.02135	1.02355	1.02789	1.03019	1.03043	1.03119	1.03336	1.03129	1.03373	1.0354	1.04048	1.04381	1.04466	1.05048	1.0544	1.06126	1.06601	1.06804	1.06933	0	0	0		2.31008e-08	2.375e-08	2.53355e-08	2.6919e-08	2.93059e-08	3.29081e-08	3.45492e-08	3.5274e-08	3.49281e-08	3.47713e-08	3.68579e-08	3.73749e-08	3.81535e-08	3.88371e-08	3.93452e-08
	Singapore	0.910755	0.910755	0.910755	0.910755	0.910755	0.910755	0.910755	0.910755	0.910755	0.910755	0.910755	0.910755	0.888192	0.848156	0.851446	0.854035	0.859099	0.864472	0.856844	0.86874	0.870507	0.851877	0.821313	0.789207	0.77485	0.760434	0.755764	0.756517	0.752314	0.692457	0.697903	0.69257		1.87605e-09	1.87605e-09	1.87605e-09	1.87605e-09	1.87605e-09	1.87605e-09	1.87605e-09	1.87605e-09	1.87605e-09	1.87605e-09	1.87605e-09	1.87605e-09	2.39344e-09	3.3115e-09	3.23606e-09
	Nauru	0.977244	0.979739	0.984583	0.989539	0.992989	1.00675	1.01405	1.01586	1.01542	1.01513	1.02135	1.02355	1.02789	1.03019	1.03043	1.03119	1.03336	1.03129	1.03373	1.0354	1.04048	1.04381	1.04466	1.05048	1.0544	1.06126	1.06601	1.06804	1.06933	1.07122	1.06902	1.07024		2.31008e-08	2.375e-08	2.53355e-08	2.6919e-08	2.93059e-08	3.29081e-08	3.45492e-08	3.5274e-08	3.49281e-08	3.47713e-08	3.68579e-08	3.73749e-08	3.81535e-08	3.88371e-08	3.93452e-08
	Guam	0.977244	0.979739	0.984583	0.989539	0.992989	1.00675	1.01405	1.01586	1.01542	1.01513	1.02135	1.02355	1.02789	1.03019	1.03043	1.03119	1.03336	1.03129	1.03373	1.0354	1.04048	1.04381	1.04466	1.05048	1.0544	1.06126	1.06601	1.06804	1.06933	1.07122	1.06902	1.07024		2.31008e-08	2.375e-08	2.53355e-08	2.6919e-08	2.93059e-08	3.29081e-08	3.45492e-08	3.5274e-08	3.49281e-08	3.47713e-08	3.68579e-08	3.73749e-08	3.81535e-08	3.88371e-08	3.93452e-08
	Cambodia	0.00460642	0.00460642	0.00460642	0.00368514	0.00307095	0.00276385	0.00335012	0.00307095	0.0035434	0.0035434	0.00368514	0.00368514	0.00368514	0.00345482	0.00379352	0.685369	0.685369	0.765345	0.781963	0.818289	0.83236	0.859724	0.87608	0.849633	0.885359	0.866777	0.866561	0.874979	0.884239	0.872348	0.846958	0.800294		4.17515e-10	4.17515e-10	4.17515e-10	3.34012e-10	2.78343e-10	2.50509e-10	3.03647e-10	2.78343e-10	3.21166e-10	3.21166e-10	3.34012e-10	3.34012e-10	3.34012e-10	3.13136e-10	3.43836e-10
	New Zealand	0.0672741	0.0683905	0.149756	0.129217	0.150649	0.166223	0.123112	0.129654	0.11692	0.149061	0.140369	0.159877	0.199175	0.166579	0.138904	0.119664	0.165932	0.211977	0.204556	0.199367	0.203481	0.272353	0.228738	0.273089	0.23669	0.299962	0.293217	0.2628	0.289585	0.219904	0.197461	0.181421		2.05199e-09	1.65909e-09	2.62064e-09	2.70843e-09	3.45499e-09	3.17137e-09	2.25897e-09	2.47815e-09	2.2576e-09	2.52557e-09	2.76382e-09	2.61752e-09	4.03546e-09	3.06145e-09	2.79501e-09
	Lao People's Democratic Republic	0.0538912	0.0568953	0.0547283	0.0502106	0.0426356	0.0461158	0.0478512	0.067209	0.072839	0.0561083	0.0596283	0.0562517	0.0570986	0.0566331	0.0455369	0.0389803	0.0351728	0.0446155	0.095114	0.107368	0.108309	0.10763	0.107058	0.105965	0.103881	0.100173	0.100411	0.0900501	0.0935047	0.115091	0.123998	0.134277		2.79417e-09	2.95984e-09	2.84726e-09	2.64196e-09	2.32742e-09	2.49574e-09	2.58052e-09	3.46606e-09	3.71885e-09	2.95666e-09	3.08763e-09	2.93631e-09	2.94593e-09	2.93291e-09	2.43719e-09
	Maldives	NA	NA	NA	NA	NA	1.00675	1.01405	1.01586	1.01542	1.01513	1.02135	1.02355	1.02789	1.03019	1.03043	1.03119	1.03336	1.03129	1.03373	1.0354	1.04048	1.04381	1.04466	1.05048	1.0544	1.06126	1.06601	1.06804	1.06933	1.07122	1.06902	1.07024		NA	NA	NA	NA	NA	3.29081e-08	3.45492e-08	3.5274e-08	3.49281e-08	3.47713e-08	3.68579e-08	3.73749e-08	3.81535e-08	3.88371e-08	3.93452e-08
	Nepal	0.144444	0.126805	0.126805	0.0638517	0.0607295	0.0607295	0.0492814	0.0414108	0.0408459	0.0419962	0.0294722	0.0288116	0.040662	0.0492814	0.0556841	0.0613682	0.0319408	0.0342557	0.0831097	0.0753259	0.0416036	0.0189592	0.0135059	0.00921284	0.0130008	0.00921284	0.00921284	0.00921284	0.0124558	0.0121399	0.00921284	0.00921284		9.91183e-10	9.70815e-10	9.70815e-10	8.98122e-10	8.94517e-10	8.94517e-10	8.81298e-10	8.7221e-10	8.71557e-10	8.72886e-10	8.58424e-10	8.57661e-10	8.71345e-10	8.81298e-10	8.88691e-10
	New Caledonia	0.777726	0.762207	0.555849	0.605933	0.551986	0.564446	0.640827	0.748132	0.548255	0.565113	0.603494	0.71285	0.715863	0.717459	0.718159	0.757794	0.755377	0.782868	0.774182	0.726873	0.75439	0.815309	0.848937	0.849751	0.837549	0.854526	0.881121	0.823949	0.783648	0.821864	0.816348	0.813947		1.85117e-08	1.86139e-08	1.45661e-08	1.67122e-08	1.65431e-08	1.8687e-08	2.20268e-08	2.61147e-08	1.90992e-08	1.95893e-08	2.19861e-08	2.61825e-08	2.67226e-08	2.71968e-08	2.75694e-08
	Bangladesh	0.60618	0.651536	0.629641	0.6242	0.600804	0.64488	0.70648	0.683957	0.670883	0.643798	0.647147	0.653596	0.667184	0.687311	0.673977	0.695071	0.68452	0.692981	0.686973	0.695027	0.688113	0.690516	0.69059	0.690559	0.69438	0.695675	0.70078	0.700529	0.705852	0.709839	0.709346	0.708664		3.79904e-09	4.08133e-09	4.14403e-09	4.43265e-09	4.24685e-09	4.53436e-09	4.54139e-09	5.09212e-09	5.16492e-09	5.18683e-09	5.43842e-09	5.63504e-09	5.58157e-09	5.59894e-09	5.50154e-09
	American Samoa	0.977244	0.979739	0.984583	0.989539	0.992989	1.00675	1.01405	1.01586	1.01542	1.01513	1.02135	1.02355	1.02789	1.03019	1.03043	1.03119	1.03336	1.03129	1.03373	1.0354	1.04048	1.04381	1.04466	1.05048	1.0544	1.06126	1.06601	1.06804	1.06933	1.07122	1.06902	1.07024		2.31008e-08	2.375e-08	2.53355e-08	2.6919e-08	2.93059e-08	3.29081e-08	3.45492e-08	3.5274e-08	3.49281e-08	3.47713e-08	3.68579e-08	3.73749e-08	3.81535e-08	3.88371e-08	3.93452e-08
	Bhutan	1.08149	1.08684	1.08338	1.0854	1.08988	0.00921284	0.00921284	0.00921284	0.00921284	0.00921284	0.00921284	0.00921284	0.00921284	0.00921284	0.00921284	0.00921284	0.00921284	0.00921284	0.00921284	0.00921284	0.00921284	0.00921284	0.00921284	0.00921284	0.00921284	0.00921284	0.00921284	0.00921284	0.00921284	0.00921284	0.00921284	0.00921284		4.78545e-08	4.88558e-08	4.83237e-08	4.82669e-08	4.90889e-08	8.3503e-10	8.3503e-10	8.3503e-10	8.3503e-10	8.3503e-10	8.3503e-10	8.3503e-10	8.3503e-10	8.3503e-10	8.3503e-10
Central and South America	Uruguay	0.289384	0.263494	0.285617	0.0266219	0.0243436	0.0285711	0.0239721	0.0442125	0.204283	0.288223	0.0584102	0.114502	0.100194	0.0794479	0.0259746	0.0647373	0.121214	0.08861	0.0865398	0.209126	0.0660886	0.0111899	0.0120688	0.0134654	0.167785	0.117182	0.317404	0.12273	0.38704	0.145102	-0.0193356	-0.0740252		1.15855e-09	1.12865e-09	1.1542e-09	8.55133e-10	8.52502e-10	8.57384e-10	8.52073e-10	8.75445e-10	1.06028e-09	1.15721e-09	8.91839e-10	9.56609e-10	9.40087e-10	9.16131e-10	8.54385e-10
	Falkland Islands (Malvinas)	NA	NA	NA	NA	NA	NA	NA	NA	0.880809	0.883474	0.880148	0.875311	0.875307	0.875141	0.881567	0.878024	0.878093	0.879593	0.876115	0.874653	0.866004	0.857936	0.851039	0.843972	0.837826	0.844481	0.840647	0.84197	0.83321	0.834612	0.829385	0.8317		NA	NA	NA	NA	NA	NA	NA	NA	9.38267e-09	9.8315e-09	1.03598e-08	1.03144e-08	9.86765e-09	1.05707e-08	1.09329e-08
	Peru	0.275721	0.231741	0.223128	0.209706	0.229798	0.189155	0.189684	0.198624	0.204045	0.211088	0.195392	0.164118	0.22765	0.183259	0.118292	0.212387	0.207272	0.238681	0.227682	0.204985	0.161555	0.124855	0.151715	0.160163	0.241911	0.212181	0.19194	0.219139	0.275422	0.258964	0.253793	0.260627		6.89809e-10	7.20188e-10	3.42927e-10	3.07293e-10	4.09193e-10	2.67778e-10	3.58015e-10	5.23099e-10	5.10177e-10	5.17017e-10	6.29428e-10	6.10856e-10	6.56444e-10	7.18972e-10	5.93702e-10
	Martinique	0.874483	0.87836	0.874937	0.874758	0.876273	0.878114	0.88365	0.885452	0.880809	0.883474	0.880148	0.875311	0.875307	0.875141	0.881567	0.878024	0.878093	0.879593	0.876115	0.874653	0.866004	0.857936	0.851039	0.843972	0.837826	0.844481	0.840647	0.84197	0.83321	0.834612	0.829385	0.8317		6.21418e-09	6.6834e-09	6.78381e-09	6.84881e-09	7.94384e-09	8.63207e-09	9.07484e-09	9.04408e-09	9.38267e-09	9.8315e-09	1.03598e-08	1.03144e-08	9.86765e-09	1.05707e-08	1.09329e-08
	Ecuador	0.663328	0.711547	0.705018	0.535661	0.217598	0.189521	0.169024	0.141439	0.13379	0.13113	0.193884	0.245205	0.276193	0.194751	0.178463	0.347981	0.287907	0.289863	0.32311	0.27321	0.25485	0.323158	0.323443	0.324254	0.354711	0.36695	0.322258	0.277169	0.279129	0.358567	0.373184	0.354032		1.59034e-09	1.64602e-09	1.63848e-09	1.44292e-09	1.07565e-09	1.04323e-09	1.01957e-09	9.87713e-10	9.7888e-10	9.75808e-10	1.04827e-09	1.10753e-09	1.14331e-09	1.04927e-09	1.03047e-09
	Trinidad and Tobago	0.701967	0.712263	0.713237	0.713285	0.7143	0.713147	0.707799	0.707378	0.707118	0.706917	0.707312	0.70783	0.708597	0.708142	0.703028	0.703964	0.715086	0.715547	0.716154	0.716103	0.716054	0.712048	0.712064	0.716784	0.713242	0.713944	0.713882	0.717636	0.71771	0.717802	0.715282	0.713206		5.56562e-09	5.93454e-09	5.98265e-09	6.01548e-09	6.00324e-09	6.03234e-09	5.84941e-09	5.89606e-09	5.90008e-09	5.89476e-09	5.90526e-09	5.91889e-09	5.93907e-09	5.92709e-09	5.8029e-09
	El Salvador	0.0755442	0.0826451	0.0658737	0.0863748	0.0583511	0.0868966	0.0610185	0.179895	0.127643	0.0896602	0.0736449	0.321531	0.292457	0.335959	0.415549	0.395518	0.291031	0.422456	0.421226	0.335798	0.443365	0.419766	0.438013	0.382311	0.401913	0.36702	0.367665	0.38051	0.330644	0.36598	0.282217	0.20458		3.17685e-09	3.91996e-09	4.1307e-09	3.43243e-09	3.17745e-09	2.05802e-09	1.83183e-09	2.38301e-09	2.00763e-09	1.97665e-09	1.91616e-09	2.56101e-09	2.04992e-09	2.16185e-09	2.3434e-09
	Costa Rica	0.0191999	0.0299505	0.0327104	0.0291205	0.0192419	0.0200687	0.0226729	0.0251071	0.0277077	0.0146767	0.0303015	0.0502899	0.130447	0.104112	0.151919	0.158058	0.0943155	0.0396184	0.0761014	0.0343006	0.0216056	0.026943	0.0211295	-0.0235272	-0.0134471	0.0379411	0.057937	0.0736027	0.0660638	0.0386955	0.0519039	0.064405		6.15642e-10	6.47877e-10	6.60581e-10	6.87233e-10	6.83743e-10	6.71272e-10	6.82127e-10	6.91587e-10	6.97722e-10	8.4134e-10	8.59382e-10	7.53365e-10	9.7502e-10	9.44611e-10	1.50052e-09
	Bolivia	0.199216	0.222075	0.198182	0.190105	0.136483	0.145175	0.158557	0.14917	0.208494	0.242647	0.287193	0.265936	0.280114	0.279065	0.33976	0.37913	0.362222	0.356312	0.391767	0.357996	0.332106	0.303972	0.311717	0.361358	0.350885	0.405213	0.399333	0.403583	0.408736	0.425552	0.440033	0.451058		5.93645e-10	1.27506e-09	1.26429e-09	6.84748e-10	5.63304e-10	6.7324e-10	7.80949e-10	5.56052e-10	1.21262e-09	1.52479e-09	1.96677e-09	1.93972e-09	1.92822e-09	2.103e-09	2.64952e-09
	Cuba	0.692917	0.707201	0.697564	0.704656	0.715589	0.71547	0.712285	0.718954	0.714018	0.721733	0.718876	0.671753	0.649588	0.724796	0.729395	0.772685	0.738281	0.755142	0.770765	0.743605	0.732747	0.738172	0.729356	0.747225	0.733572	0.793127	0.802874	0.802175	0.784465	0.779449	0.793194	0.812474		-2.67247e-09	-2.44189e-09	-2.68861e-09	-2.49699e-09	-2.24703e-09	-2.28209e-09	-2.34578e-09	-2.23636e-09	-2.31101e-09	-2.13762e-09	-2.16421e-09	-3.17801e-09	-3.69448e-09	-2.03314e-09	-1.97673e-09
	Colombia	0.211117	0.213119	0.230873	0.247502	0.240143	0.229577	0.193294	0.255311	0.206265	0.184163	0.206611	0.221368	0.283231	0.226495	0.183306	0.214778	0.145642	0.23124	0.235443	0.167536	0.1905	0.189051	0.176249	0.17034	0.142814	0.148801	0.145785	0.140135	0.117218	0.212107	0.217014	0.194229		5.34534e-09	5.3042e-09	5.79321e-09	5.48976e-09	6.49687e-09	7.16519e-09	6.04549e-09	7.82921e-09	6.48516e-09	6.28486e-09	6.95081e-09	7.32462e-09	9.48548e-09	7.44273e-09	5.92211e-09
	Montserrat	0.874483	0.87836	0.874937	0.874758	0.876273	0.878114	0.88365	0.885452	0.880809	0.883474	0.880148	0.875311	0.875307	0.875141	0.881567	0.878024	0.878093	0.879593	0.876115	0.874653	0.866004	0.857936	0.851039	0.843972	0.837826	0.844481	0.840647	0.84197	0.83321	0.834612	0.829385	0.8317		6.21418e-09	6.6834e-09	6.78381e-09	6.84881e-09	7.94384e-09	8.63207e-09	9.07484e-09	9.04408e-09	9.38267e-09	9.8315e-09	1.03598e-08	1.03144e-08	9.86765e-09	1.05707e-08	1.09329e-08
	Jamaica	0.783156	0.79318	0.778786	0.788745	0.811199	0.814214	0.795732	0.781344	0.767064	0.768553	0.783392	0.814997	0.779637	0.810536	0.825427	0.848051	0.844591	0.846732	0.859207	0.860204	0.861164	0.872951	0.890763	0.884746	0.878618	0.875999	0.873695	0.87757	0.871955	0.865839	0.828887	0.757593		2.90519e-10	6.03033e-10	3.49749e-10	5.11628e-10	4.80202e-10	5.6491e-10	5.79062e-10	1.48453e-10	-3.71824e-10	-1.61909e-10	-1.23214e-10	7.96291e-10	-1.14087e-10	1.07011e-10	4.68799e-10
	Netherlands Antilles	0.874483	0.87836	0.874937	0.874758	0.876273	0.878114	0.88365	0.885452	0.880809	0.883474	0.880148	0.875311	0.875307	0.875141	0.881567	0.878024	0.878093	0.879593	0.876115	0.874653	0.842525	0.834017	0.827317	0.822309	0.816695	0.823888	0.819624	0.821609	0.812728	0.796463	0.791182	0.793084		6.21418e-09	6.6834e-09	6.78381e-09	6.84881e-09	7.94384e-09	8.63207e-09	9.07484e-09	9.04408e-09	9.38267e-09	9.8315e-09	1.03598e-08	1.03144e-08	9.86765e-09	1.05707e-08	1.09329e-08
	Saint Lucia	0.874483	0.87836	0.874937	0.874758	0.876273	0.878114	0.88365	0.885452	0.880809	0.883474	0.880148	0.875311	0.875307	0.875141	0.881567	0.878024	0.878093	0.879593	0.876115	0.874653	0.866004	0.857936	0.851039	0.843972	0.837826	0.844481	0.840647	0.84197	0.83321	0.834612	0.829385	0.8317		6.21418e-09	6.6834e-09	6.78381e-09	6.84881e-09	7.94384e-09	8.63207e-09	9.07484e-09	9.04408e-09	9.38267e-09	9.8315e-09	1.03598e-08	1.03144e-08	9.86765e-09	1.05707e-08	1.09329e-08
	Chile	0.365777	0.358785	0.266077	0.256891	0.284348	0.239548	0.20511	0.195816	0.300504	0.452278	0.389614	0.324222	0.127861	0.135552	0.208904	0.235826	0.317891	0.379947	0.469529	0.535617	0.391306	0.285665	0.289601	0.335593	0.367596	0.326063	0.351526	0.460382	0.450921	0.383978	0.493024	0.490292		1.64546e-08	1.66383e-08	1.02777e-08	1.16468e-08	1.59187e-08	1.33831e-08	1.1429e-08	1.09794e-08	1.94189e-08	2.92681e-08	2.50322e-08	2.03321e-08	8.52536e-09	8.80844e-09	1.3852e-08
	United States Virgin Islands	0.874483	0.87836	0.874937	0.874758	0.876273	0.878114	0.88365	0.885452	0.880809	0.883474	0.880148	0.875311	0.875307	0.875141	0.881567	0.878024	0.878093	0.879593	0.876115	0.874653	0.866004	0.857936	0.851039	0.843972	0.837826	0.844481	0.840647	0.84197	0.83321	0.834612	0.829385	0.8317		6.21418e-09	6.6834e-09	6.78381e-09	6.84881e-09	7.94384e-09	8.63207e-09	9.07484e-09	9.04408e-09	9.38267e-09	9.8315e-09	1.03598e-08	1.03144e-08	9.86765e-09	1.05707e-08	1.09329e-08
	Bahamas	0.874483	0.87836	0.874937	0.874758	0.876273	0.878114	0.88365	0.885452	0.880809	0.883474	0.880148	0.875311	0.875307	0.875141	0.881567	0.878024	0.878093	0.879593	0.876115	0.874653	0.866004	0.857936	0.851039	0.843972	0.837826	0.844481	0.840647	0.84197	0.83321	0.834612	0.829385	0.8317		6.21418e-09	6.6834e-09	6.78381e-09	6.84881e-09	7.94384e-09	8.63207e-09	9.07484e-09	9.04408e-09	9.38267e-09	9.8315e-09	1.03598e-08	1.03144e-08	9.86765e-09	1.05707e-08	1.09329e-08
	Haiti	0.200326	0.216555	0.324963	0.331243	0.349438	0.340251	0.359332	0.369178	0.387854	0.387854	0.363425	0.381436	0.383438	0.403637	0.405012	0.485499	0.526491	0.593545	0.481449	0.468489	0.425309	0.467892	0.477321	0.468822	0.477321	0.468489	0.476679	0.603411	0.570172	0.645595	0.632096	0.610241		-5.83825e-10	-4.62614e-10	-3.10653e-14	6.30187e-11	1.58629e-10	2.33561e-10	3.45023e-10	3.72363e-10	4.24214e-10	4.24214e-10	4.50718e-10	4.31177e-10	1.26715e-09	1.29047e-09	1.29206e-09
	Argentina	0.449319	0.445066	0.41063	0.396376	0.356897	0.323805	0.360536	0.367727	0.476811	0.49055	0.353711	0.403339	0.404785	0.374507	0.33548	0.372331	0.418558	0.363902	0.394264	0.46779	0.430804	0.358454	0.344878	0.374948	0.431007	0.43037	0.425695	0.479594	0.496918	0.444613	0.476503	0.502533		3.43662e-09	3.62914e-09	3.45559e-09	3.60892e-09	3.14314e-09	3.35335e-09	3.7735e-09	3.59543e-09	5.06171e-09	4.65391e-09	3.78184e-09	4.13411e-09	3.99949e-09	4.08963e-09	4.91973e-09
	Antigua and Barbuda	0.874483	0.87836	0.874937	0.874758	0.876273	0.878114	0.88365	0.885452	0.880809	0.883474	0.880148	0.875311	0.875307	0.875141	0.881567	0.878024	0.878093	0.879593	0.876115	0.874653	0.866004	0.857936	0.851039	0.843972	0.837826	0.844481	0.840647	0.84197	0.83321	0.834612	0.829385	0.8317		6.21418e-09	6.6834e-09	6.78381e-09	6.84881e-09	7.94384e-09	8.63207e-09	9.07484e-09	9.04408e-09	9.38267e-09	9.8315e-09	1.03598e-08	1.03144e-08	9.86765e-09	1.05707e-08	1.09329e-08
	Grenada	0.874483	0.87836	0.874937	0.874758	0.876273	0.878114	0.88365	0.885452	0.880809	0.883474	0.880148	0.875311	0.875307	0.875141	0.881567	0.878024	0.878093	0.879593	0.876115	0.874653	0.866004	0.857936	0.851039	0.843972	0.837826	0.844481	0.840647	0.84197	0.83321	0.834612	0.829385	0.8317		6.21418e-09	6.6834e-09	6.78381e-09	6.84881e-09	7.94384e-09	8.63207e-09	9.07484e-09	9.04408e-09	9.38267e-09	9.8315e-09	1.03598e-08	1.03144e-08	9.86765e-09	1.05707e-08	1.09329e-08
	Dominican Republic	0.698095	0.666163	0.647694	0.649712	0.726232	0.706056	0.72197	0.732504	0.746521	0.72859	0.799116	0.792535	0.798794	0.727517	0.799412	0.802639	0.785949	0.819689	0.832595	0.807175	0.824432	0.849191	0.837145	0.829385	0.763305	0.739562	0.772826	0.768044	0.80848	0.821442	0.808947	0.790017		5.54542e-10	6.45124e-10	3.65269e-10	3.02565e-10	1.1099e-10	9.30984e-09	2.34678e-09	9.61601e-09	7.14377e-09	1.63959e-09	2.12119e-09	8.50346e-09	6.05769e-09	7.13982e-09	2.86588e-09
	Saint Vincent and the Grenadines	0.00921284	0.443786	0.442075	0.441986	0.298233	0.298847	0.300692	0.228273	0.227112	0.227778	0.44468	0.658786	0.528869	0.52877	0.590782	0.58842	0.629842	0.630913	0.628429	0.627384	0.651806	0.751846	0.663967	0.67702	0.672103	0.692614	0.702074	0.713854	0.695877	0.697046	0.703205	0.714202		8.3503e-10	3.75922e-09	3.80942e-09	3.84192e-09	3.20463e-09	3.43404e-09	3.58163e-09	2.88729e-09	2.97194e-09	3.08415e-09	5.59743e-09	7.94458e-09	6.2546e-09	6.67642e-09	7.56694e-09
	Barbados	0.874483	0.87836	0.874937	0.874758	0.876273	0.878114	0.88365	0.885452	0.880809	0.883474	0.880148	0.875311	0.875307	0.875141	0.881567	0.878024	0.878093	0.879593	0.876115	0.874653	0.866004	0.857936	0.851039	0.843972	0.837826	0.844481	0.840647	0.84197	0.83321	0.834612	0.829385	0.8317		6.21418e-09	6.6834e-09	6.78381e-09	6.84881e-09	7.94384e-09	8.63207e-09	9.07484e-09	9.04408e-09	9.38267e-09	9.8315e-09	1.03598e-08	1.03144e-08	9.86765e-09	1.05707e-08	1.09329e-08
	Venezuela (Bolivarian Republic of)	0.456732	0.489477	0.4871	0.461476	0.435531	0.42122	0.384284	0.332044	0.317183	0.312479	0.289523	0.222585	0.226778	0.237144	0.207216	0.220352	0.210539	0.19813	0.214296	0.190354	0.205423	0.25468	0.260882	0.272869	0.230975	0.210988	0.208667	0.22056	0.217102	0.225549	0.278313	0.271082		2.49547e-09	2.51847e-09	2.609e-09	2.66969e-09	2.86348e-09	2.84827e-09	2.76582e-09	2.49984e-09	2.46252e-09	2.26268e-09	2.32013e-09	2.15331e-09	2.10628e-09	2.22192e-09	2.14739e-09
	Nicaragua	0.413436	0.439957	0.473802	0.583663	0.430527	0.43226	0.472157	0.480415	0.461866	0.301773	0.399777	0.421056	0.501559	0.43317	0.518062	0.546505	0.562833	0.595682	0.695668	0.669327	0.74257	0.73614	0.669047	0.60965	0.616238	0.553433	0.597191	0.586124	0.546809	0.559018	0.501889	0.450928		-1.03527e-10	-2.13312e-11	-6.11094e-11	2.34703e-09	3.76147e-09	3.61994e-09	3.06695e-09	2.66968e-09	2.70389e-09	3.50354e-09	3.59944e-09	3.79752e-09	3.75659e-09	3.22648e-09	3.07426e-09
	Suriname	0.373537	0.334314	0.175698	0.300424	0.214154	0.165169	0.318281	0.460609	0.405393	0.173548	0.200818	0.154427	0.151029	0.157658	0.15791	0.179676	0.0836883	0.0838169	0.0829918	0.0818372	0.428363	0.424545	0.415409	0.409202	0.403518	0.390892	0.382292	0.382886	0.3766	0.379584	0.377239	0.378278		3.09994e-09	3.02259e-09	1.97903e-09	2.85836e-09	2.51529e-09	2.2345e-09	3.74738e-09	5.06393e-09	4.72032e-09	2.5261e-09	2.93048e-09	2.42439e-09	2.31406e-09	2.504e-09	2.55626e-09
	Guatemala	0.408737	0.649682	0.554432	0.385594	0.49349	0.467162	0.0179738	0.0778811	0.0813234	0.0394297	-0.118567	-0.0877726	-0.00628278	-0.0026212	0.00585853	0.0871013	0.0504703	0.0180773	0.219513	0.153597	0.245645	0.276349	0.358746	0.31752	0.200054	0.17296	0.217016	0.26775	0.227186	0.00739988	-0.0718007	-0.176241		-6.37243e-09	6.58101e-11	-3.91479e-10	-2.67424e-10	-1.82248e-10	-1.44948e-10	-4.84206e-10	-5.68674e-10	-6.5386e-10	-8.04497e-10	-5.50771e-09	-5.90487e-09	-6.43133e-09	-6.13424e-09	-5.99593e-09
	Honduras	0.130769	0.148627	0.175517	0.20483	0.158011	0.158011	0.104446	0.121032	0.0855338	0.086229	0.0816582	0.0807007	0.0782671	0.0831097	0.141667	0.252549	0.30062	0.299841	0.391685	0.296067	0.341225	0.456358	0.538055	0.537007	0.6157	0.563847	0.534466	0.525392	0.515567	0.462182	0.454653	0.451415		9.75392e-10	9.96012e-10	1.02706e-09	1.06091e-09	1.00685e-09	1.00685e-09	9.44997e-10	9.64149e-10	9.23159e-10	9.23961e-10	9.18683e-10	9.17578e-10	9.14768e-10	9.2036e-10	9.87976e-10
	Dominica	NA	0.00921284	0.00921284	0.00921284	0.00921284	0.443664	0.446431	0.447332	0.445011	0.446343	0.44468	0.442262	0.44226	0.442177	0.44539	0.58842	0.588467	0.531441	0.529354	0.441933	0.498808	0.615444	0.490257	0.565719	0.482706	0.605833	0.603094	0.633781	0.62721	0.628263	0.583333	0.557538		NA	8.3503e-10	8.3503e-10	8.3503e-10	8.3503e-10	4.73355e-09	4.95493e-09	4.93955e-09	5.10885e-09	5.33326e-09	5.59743e-09	5.57473e-09	5.35134e-09	5.70285e-09	5.88396e-09
	Cayman Islands	0.874483	0.87836	0.874937	0.874758	0.876273	0.878114	0.88365	0.885452	0.880809	0.883474	0.880148	0.875311	0.875307	0.875141	0.881567	0.878024	0.878093	0.879593	0.876115	0.874653	0.866004	0.857936	0.851039	0.843972	0.837826	0.844481	0.840647	0.84197	0.83321	0.834612	0.829385	0.8317		6.21418e-09	6.6834e-09	6.78381e-09	6.84881e-09	7.94384e-09	8.63207e-09	9.07484e-09	9.04408e-09	9.38267e-09	9.8315e-09	1.03598e-08	1.03144e-08	9.86765e-09	1.05707e-08	1.09329e-08
	Brazil	0.182775	0.187976	0.179221	0.16399	0.164337	0.166797	0.19526	0.178656	0.174219	0.174932	0.166241	0.168595	0.165335	0.166766	0.161193	0.164092	0.164689	0.168097	0.167429	0.184312	0.188573	0.193081	0.173191	0.160629	0.169627	0.160165	0.158237	0.150396	0.164527	0.127239	0.124098	0.124133		4.10343e-09	5.23538e-09	4.98696e-09	3.64039e-09	4.20919e-09	4.24447e-09	5.16579e-09	4.3698e-09	3.72392e-09	4.36703e-09	3.63007e-09	4.02e-09	3.64276e-09	3.62494e-09	3.16311e-09
	Puerto Rico	0.861461	0.870368	0.867145	0.866348	0.866696	0.864608	0.867751	0.86851	0.863441	0.865936	0.872191	0.868895	0.868014	0.868715	0.878455	0.874029	0.871773	0.874949	0.8716	0.868191	0.860112	0.852986	0.847043	0.840484	0.833018	0.840129	0.835762	0.835995	0.827299	0.827834	0.823493	0.825943		6.13323e-09	6.62962e-09	6.73027e-09	6.79037e-09	7.86532e-09	8.51088e-09	8.92502e-09	8.88536e-09	9.21235e-09	9.65103e-09	1.02728e-08	1.02442e-08	9.79159e-09	1.04984e-08	1.08969e-08
	Saint Kitts and Nevis	0.874483	0.87836	0.874937	0.874758	0.876273	0.878114	0.88365	0.885452	0.880809	0.883474	0.880148	0.875311	0.875307	0.875141	0.881567	0.878024	0.878093	0.879593	0.876115	0.874653	0.866004	0.857936	0.851039	0.843972	0.837826	0.844481	0.840647	0.84197	0.83321	0.834612	0.829385	0.8317		6.21418e-09	6.6834e-09	6.78381e-09	6.84881e-09	7.94384e-09	8.63207e-09	9.07484e-09	9.04408e-09	9.38267e-09	9.8315e-09	1.03598e-08	1.03144e-08	9.86765e-09	1.05707e-08	1.09329e-08
	Paraguay	-0.0219972	-0.0509155	-0.0155322	-0.0299467	-0.0417655	0.00578705	0.00878938	0.00862887	0.0099901	0.00873645	0.00933197	0.00932317	0.00933215	0.00894628	0.00930273	0.00922983	0.00922864	0.00922692	0.00940575	0.00806282	0.0092111	0.00921079	0.00921091	0.00921104	0.00921284	0.00921284	0.00921284	0.00921284	0.00921284	0.00921284	0.00921284	0.00921284		-1.85971e-09	-2.38735e-09	-1.30152e-09	-1.60951e-09	-1.89699e-09	3.52378e-10	6.7004e-10	7.01851e-10	7.86594e-10	7.93898e-10	8.17092e-10	8.18416e-10	8.17065e-10	7.87368e-10	8.21494e-10
	Belize	-0.167382	-0.165229	-0.16713	-0.167229	-0.062122	-0.0610171	0.0278811	0.0290278	0.097301	0.0990777	0.208759	0.249971	0.323537	0.354062	0.328324	0.163235	0.0667316	0.110145	0.0658523	0.0622557	0.0133045	-0.13907	-0.150062	0.0932722	0.00242361	0.0517929	-0.133346	-0.13318	-0.194456	-0.644268	-0.570758	-0.492118		-1.8796e-08	-1.85353e-08	-1.84795e-08	-1.84434e-08	-1.52572e-08	-1.48443e-08	-1.24283e-08	-1.24479e-08	-1.04311e-08	-1.01319e-08	-6.90262e-09	-5.78509e-09	-4.23268e-09	-2.90253e-09	-3.41808e-09
	Guadeloupe	0.874483	0.87836	0.874937	0.874758	0.876273	0.878114	0.838181	0.845112	0.844289	0.84388	0.846657	0.844932	0.847372	0.849014	0.856576	0.853142	0.85572	0.858532	0.84825	0.846838	0.83161	0.824165	0.80888	0.747975	0.743334	0.749947	0.749463	0.750634	0.742885	0.762445	0.758567	0.761523		6.21418e-09	6.6834e-09	6.78381e-09	6.84881e-09	7.94384e-09	8.63207e-09	9.05443e-09	9.02753e-09	9.35244e-09	9.77711e-09	1.02919e-08	1.02542e-08	9.82764e-09	1.05106e-08	1.08648e-08
	Guyana	0.874483	0.87836	0.874937	0.874758	0.876273	0.878114	0.88365	0.885452	0.880809	0.883474	0.880148	0.875311	0.875307	0.875141	0.881567	0.878024	0.878093	0.879593	0.876115	0.874653	0.866004	0.857936	0.851039	0.843972	0.837826	0.844481	0.840647	0.84197	0.83321	0.834612	0.829385	0.8317		6.21418e-09	6.6834e-09	6.78381e-09	6.84881e-09	7.94384e-09	8.63207e-09	9.07484e-09	9.04408e-09	9.38267e-09	9.8315e-09	1.03598e-08	1.03144e-08	9.86765e-09	1.05707e-08	1.09329e-08
	French Guiana	0.874483	0.87836	0.874937	0.874758	0.876273	0.878114	0.88365	0.885452	0.880809	0.883474	0.880148	0.875311	0.875307	0.875141	0.881567	0.878024	0.878093	0.879593	0.876115	0.874653	0.866004	0.857936	0.851039	0.843972	0.837826	0.844481	0.840647	0.84197	0.778378	0.0643266	0.0618336	0.0601472		6.21418e-09	6.6834e-09	6.78381e-09	6.84881e-09	7.94384e-09	8.63207e-09	9.07484e-09	9.04408e-09	9.38267e-09	9.8315e-09	1.03598e-08	1.03144e-08	9.86765e-09	1.05707e-08	1.09329e-08
	Panama	0.376101	0.145277	0.294852	0.432678	0.20198	0.133669	0.134283	0.179224	0.0803835	0.125418	0.163608	0.241259	0.283606	0.239566	0.239382	0.282948	0.251881	0.278852	0.373602	0.260898	0.259213	0.449412	0.315631	0.43349	0.300152	0.315129	0.355442	0.384773	0.338224	0.374841	0.371716	0.382653		1.53374e-10	-2.46818e-09	-2.46176e-09	-1.66993e-09	-1.88513e-09	-8.06237e-10	-8.35534e-10	-5.6676e-10	-1.26883e-09	-1.44433e-10	3.03044e-10	9.23034e-11	4.59113e-10	7.85725e-10	7.9719e-10
Eurasia	Armenia	NA	NA	NA	NA	NA	NA	NA	NA	NA	NA	NA	NA	0.55275	0.243591	0.290735	0.466748	0.279702	0.369516	0.362065	0.304138	0.331224	0.34634	0.212851	0.205813	0.21839	0.214949	0.186216	0.188709	0.222708	0.15243	0.164604	0.174209		NA	NA	NA	NA	NA	NA	NA	NA	NA	NA	NA	NA	2.49429e-09	2.13091e-09	2.344e-09
	Tajikistan	NA	NA	NA	NA	NA	NA	NA	NA	NA	NA	NA	NA	0.0451918	0.032751	0.0206467	0.0169994	0.0168839	0.0230838	0.0216868	0.0246994	0.019392	0.017213	0.015318	0.0161793	0.015316	0.0138407	0.0185515	0.0236058	0.0226282	0.0221566	0.03246	0.0424136		NA	NA	NA	NA	NA	NA	NA	NA	NA	NA	NA	NA	1.10879e-09	1.01413e-09	9.22029e-10
	Kyrgyzstan	NA	NA	NA	NA	NA	NA	NA	NA	NA	NA	NA	NA	0.184544	0.174138	0.0915062	0.0852473	0.0939437	0.11571	0.12776	0.0698646	0.123566	0.14035	0.14685	0.112274	0.114689	0.113132	0.110017	0.119959	0.0837253	0.0987441	0.0887219	0.0725072		NA	NA	NA	NA	NA	NA	NA	NA	NA	NA	NA	NA	4.70553e-09	5.90978e-09	3.68812e-09
	Belarus	NA	NA	NA	NA	NA	NA	NA	NA	NA	NA	NA	NA	0.779051	0.773348	0.773219	0.773132	0.757166	0.745179	0.744818	0.742962	0.732161	0.730389	0.729417	0.727432	0.72875	0.723597	0.722436	0.714698	0.72014	0.742125	0.710074	0.70247		NA	NA	NA	NA	NA	NA	NA	NA	NA	NA	NA	NA	4.89002e-09	5.02002e-09	5.02253e-09
	Latvia	NA	NA	NA	NA	NA	NA	NA	NA	NA	NA	NA	NA	0.249222	0.212251	0.216146	0.208571	0.328073	0.253914	0.248218	0.252061	0.231813	0.244715	0.270584	0.289509	0.221158	0.209336	0.297468	0.281755	0.271941	0.247502	0.308249	0.352765		NA	NA	NA	NA	NA	NA	NA	NA	NA	NA	NA	NA	2.5111e-09	1.74985e-09	1.40558e-09
	Ukraine	NA	NA	NA	NA	NA	NA	NA	NA	NA	NA	NA	NA	0.886014	0.809034	0.781688	0.756195	0.649768	0.633481	0.600191	0.637013	0.620612	0.624462	0.634418	0.625032	0.546302	0.567006	0.632312	0.644491	0.655571	0.657498	0.648424	0.646209		NA	NA	NA	NA	NA	NA	NA	NA	NA	NA	NA	NA	2.4694e-08	2.26823e-08	2.26367e-08
	Azerbaijan	NA	NA	NA	NA	NA	NA	NA	NA	NA	NA	NA	NA	0.826811	0.791455	0.777742	0.789287	0.790551	0.779803	0.771064	0.795362	0.795916	0.733432	0.699393	0.701606	0.679516	0.667415	0.689901	0.673335	0.658175	0.634345	0.583864	0.626778		NA	NA	NA	NA	NA	NA	NA	NA	NA	NA	NA	NA	1.77912e-09	1.76216e-09	2.55853e-09
	Lithuania	NA	NA	NA	NA	NA	NA	NA	NA	NA	NA	NA	NA	0.17888	0.0977021	0.152038	0.103199	0.117114	0.139381	0.174956	0.189343	0.166912	0.149356	0.126751	0.122932	0.130858	0.184701	0.179568	0.163164	0.156287	0.149915	0.559528	0.545142		NA	NA	NA	NA	NA	NA	NA	NA	NA	NA	NA	NA	3.11449e-09	2.99733e-09	2.933e-09
	Estonia	NA	NA	NA	NA	NA	NA	NA	NA	NA	NA	NA	NA	1.12964	1.12852	1.1375	1.13559	1.13503	1.13481	1.12747	1.12741	1.11624	1.11646	1.1175	1.12242	1.12218	1.11112	1.10817	1.12177	1.10939	1.01646	0.955069	0.937963		NA	NA	NA	NA	NA	NA	NA	NA	NA	NA	NA	NA	5.5617e-08	5.48292e-08	5.74711e-08
	Kazakhstan	NA	NA	NA	NA	NA	NA	NA	NA	NA	NA	NA	NA	0.979747	0.964803	0.929373	0.948191	0.949478	0.944351	0.947563	0.944802	0.918248	0.925893	0.911338	0.934802	0.95766	0.957996	0.952097	0.973526	0.990871	0.973974	0.995321	1.00036		NA	NA	NA	NA	NA	NA	NA	NA	NA	NA	NA	NA	4.3554e-08	4.30097e-08	4.24893e-08
	Georgia	NA	NA	NA	NA	NA	NA	NA	NA	NA	NA	NA	NA	0.319202	0.238263	0.175084	0.193581	0.135173	0.126345	0.162015	0.152631	0.15973	0.147048	0.0557068	0.0694706	0.0960555	0.106588	0.19482	0.133317	0.113125	0.100608	0.0603689	0.0307576		NA	NA	NA	NA	NA	NA	NA	NA	NA	NA	NA	NA	2.89622e-09	2.29227e-09	1.94599e-09
	Uzbekistan	NA	NA	NA	NA	NA	NA	NA	NA	NA	NA	NA	NA	0.662514	0.643863	0.650746	0.659348	0.651774	0.667081	0.66694	0.664734	0.663534	0.663323	0.662274	0.639395	0.618707	0.620085	0.615405	0.64846	0.573102	0.603171	0.585159	0.596241		NA	NA	NA	NA	NA	NA	NA	NA	NA	NA	NA	NA	7.8415e-09	8.66787e-09	9.65634e-09
	Turkmenistan	NA	NA	NA	NA	NA	NA	NA	NA	NA	NA	NA	NA	0.720226	0.720226	0.720226	0.720226	0.720226	0.720226	0.720226	0.720226	0.720226	0.720226	0.720226	0.720226	0.720226	0.720226	0.720226	0.720226	0.720226	0.720226	0.720226	0.720226		NA	NA	NA	NA	NA	NA	NA	NA	NA	NA	NA	NA	6.24508e-09	6.24508e-09	6.24508e-09
	Russian Federation & U.S.S.R.	0.849584	0.849174	0.847738	0.843298	0.815446	0.803532	0.804437	0.795392	0.776652	0.781332	0.781238	0.774641	0.744526	0.723038	0.734757	0.735346	0.736251	0.722755	0.736767	0.706909	0.701396	0.679796	0.68151	0.686131	0.658471	0.660352	0.675073	0.654642	0.686899	0.644512	0.644021	0.660019		2.83311e-08	2.83063e-08	2.83063e-08	2.81739e-08	2.73078e-08	2.69537e-08	2.69616e-08	2.66938e-08	2.61165e-08	2.62753e-08	2.6258e-08	2.6218e-08	2.68992e-08	2.75485e-08	3.12331e-08
Europe	Hungary	1.15301	1.15299	1.15779	1.04314	0.992785	0.856156	0.838874	0.732773	0.646987	0.629167	0.618266	0.618986	0.640441	0.648938	0.642754	0.652929	0.666211	0.666105	0.682029	0.69028	0.664867	0.665383	0.679629	0.741831	0.669515	0.563387	0.592106	0.5852	0.560016	0.457275	0.463691	0.484158		1.1301e-07	1.13106e-07	1.14822e-07	1.02868e-07	1.00834e-07	8.09621e-08	8.10181e-08	7.52201e-08	7.11176e-08	6.66496e-08	6.86944e-08	6.17162e-08	6.57119e-08	6.25817e-08	5.9771e-08
	Czech Republic	NA	NA	NA	NA	NA	NA	NA	NA	NA	NA	NA	NA	NA	0.906276	0.891125	0.90469	0.906597	0.904421	0.907679	0.882102	0.920321	0.902566	0.840189	0.78998	0.772035	0.779402	0.760068	0.777233	0.740142	0.698856	0.685174	0.662595		NA	NA	NA	NA	NA	NA	NA	NA	NA	NA	NA	NA	NA	9.87378e-08	9.69637e-08
	Gibraltar	1.00967	1.01898	1.03951	1.05577	1.09335	1.10651	1.11371	1.11679	1.10814	1.11198	1.11295	1.10885	1.09984	1.11346	1.10004	1.0913	1.06823	1.03473	1.03578	1.03285	1.03706	1.01777	1.00608	0.98811	0.965651	0.934546	0.905833	0.909508	0.852538	0.839749	0.825539	0.874064		2.75664e-08	3.01788e-08	3.52366e-08	3.89199e-08	4.73085e-08	5.07404e-08	5.22155e-08	5.24716e-08	5.05255e-08	5.11209e-08	5.14369e-08	5.03425e-08	4.8279e-08	5.1299e-08	4.93905e-08
	Serbia	NA	NA	NA	NA	NA	NA	NA	NA	NA	NA	NA	NA	0.906523	0.914903	0.89935	0.901959	0.852707	0.905962	0.87042	0.788824	0.85699	0.851326	0.878666	0.95604	0.932831	0.884415	0.932642	0.961567	0.986143	0.963632	0.907959	0.853614		NA	NA	NA	NA	NA	NA	NA	NA	NA	NA	NA	NA	1.51053e-07	1.54197e-07	1.5211e-07
	Cyprus	0.910755	0.910755	0.910755	0.910755	0.910755	0.910755	0.910755	0.910755	0.910755	0.910755	0.910755	0.910755	0.910755	0.910755	0.910755	0.910755	0.910755	0.910755	0.910755	0.910755	0.910755	0.910755	0.910755	0.910755	0.910755	0.910755	0.910755	0.910755	0.905764	0.910755	0.882232	0.879411		1.87605e-09	1.87605e-09	1.87605e-09	1.87605e-09	1.87605e-09	1.87605e-09	1.87605e-09	1.87605e-09	1.87605e-09	1.87605e-09	1.87605e-09	1.87605e-09	1.87605e-09	1.87605e-09	1.87605e-09
	Denmark	0.946398	0.954934	0.967216	0.973692	0.975387	0.967396	0.961655	0.964398	0.951726	0.939744	0.922112	0.925288	0.890835	0.874127	0.867258	0.8354	0.848893	0.783615	0.721654	0.668492	0.611537	0.60548	0.577831	0.593937	0.491275	0.421477	0.5454	0.47855	0.441299	0.428769	0.344568	0.281104		2.7596e-08	2.89895e-08	3.08301e-08	3.20346e-08	3.23178e-08	3.15504e-08	3.12404e-08	3.16918e-08	3.08181e-08	3.02897e-08	3.03404e-08	3.05565e-08	2.90452e-08	2.83935e-08	2.70084e-08
	Bosnia and Herzegovina	NA	NA	NA	NA	NA	NA	NA	NA	NA	NA	NA	NA	0.607199	0.365159	0.230255	0.215918	0.374798	0.594195	0.6685	0.602391	0.648586	0.649549	0.645498	0.761188	0.670919	0.662302	0.708738	0.839137	0.833203	0.764783	0.673343	0.597571		NA	NA	NA	NA	NA	NA	NA	NA	NA	NA	NA	NA	4.44685e-08	2.68913e-08	1.65719e-08
	Italy	0.60536	0.61523	0.610674	0.614073	0.600804	0.614779	0.609989	0.661893	0.640862	0.694943	0.70923	0.668579	0.661096	0.651281	0.649558	0.680828	0.660031	0.654687	0.654185	0.631516	0.635371	0.626618	0.651333	0.657813	0.630874	0.63406	0.629987	0.630921	0.603084	0.552644	0.528458	0.509908		4.40804e-09	4.9987e-09	5.85929e-09	5.98063e-09	7.09018e-09	7.47597e-09	7.43967e-09	7.53356e-09	7.43217e-09	7.27336e-09	7.84173e-09	6.97729e-09	5.62047e-09	4.99009e-09	5.26599e-09
	France	0.438711	0.334007	0.342218	0.276678	0.211129	0.17389	0.130189	0.115822	0.107	0.132661	0.119895	0.138534	0.115747	0.0796086	0.0764051	0.0824282	0.0899411	0.0801143	0.109233	0.0948522	0.090154	0.0751706	0.0827591	0.0883099	0.0840155	0.093854	0.0839018	0.0861451	0.0811942	0.0779709	0.0814468	0.0649073		7.41851e-09	6.55352e-09	7.10685e-09	6.60826e-09	5.91959e-09	5.39354e-09	4.69719e-09	4.40406e-09	4.2407e-09	4.65626e-09	4.51756e-09	4.70809e-09	4.39848e-09	3.8705e-09	3.75738e-09
	Poland	1.11033	1.11082	1.11779	1.11625	1.12011	1.11601	1.11941	1.12326	1.12281	1.12557	1.12555	1.12126	1.12043	1.12224	1.12013	1.1189	1.11804	1.11406	1.11074	1.11265	1.11175	1.10398	1.09862	1.10764	1.09417	1.07771	1.07253	1.05637	1.03281	0.98907	0.964676	0.93864		8.57609e-08	8.61725e-08	8.72159e-08	8.72695e-08	8.78696e-08	8.77435e-08	8.80711e-08	8.82697e-08	8.8287e-08	8.84521e-08	8.84642e-08	8.82004e-08	8.81684e-08	8.82236e-08	8.79687e-08
	Sweden	0.0646751	0.0307587	0.0319477	0.0256024	0.0246129	0.0365817	0.0380623	0.0344788	0.0327337	0.0276562	0.0182236	0.0278956	0.029495	0.0328588	0.0392817	0.0353317	0.0599654	0.0313485	0.0288016	0.0305388	0.0128124	0.0207477	0.0259134	0.0341325	-0.00193917	-0.00906441	-0.0142513	-0.0224817	-0.0233789	-0.0370241	-0.0237627	-0.00843437		1.30282e-09	1.53068e-09	1.65038e-09	1.71518e-09	1.92671e-09	2.16281e-09	2.41079e-09	2.27719e-09	2.30261e-09	2.15342e-09	2.00585e-09	2.34434e-09	2.1264e-09	2.12762e-09	2.41046e-09
	Norway	0.00853885	0.00840802	0.009151	0.00933514	0.00939452	0.00940801	0.00986805	0.00999357	0.00962628	0.00951188	0.00766212	0.00758621	0.00758938	0.00736515	0.00784427	0.00773406	0.00811986	0.00825181	0.00788585	0.0081861	0.00786089	0.00728606	0.00770611	0.00748032	0.00746219	0.00795405	0.00817495	0.00924573	0.00795164	0.0234342	0.0258223	0.0222956		8.26522e-10	8.2646e-10	8.25977e-10	8.34457e-10	8.35501e-10	8.33023e-10	8.28478e-10	8.27256e-10	8.28091e-10	8.27497e-10	8.32906e-10	8.30106e-10	8.31981e-10	8.23343e-10	8.11186e-10
	Portugal	0.374857	0.509958	0.433185	0.439146	0.388045	0.332237	0.477413	0.469045	0.363265	0.674865	0.593354	0.60577	0.733126	0.634964	0.577517	0.66176	0.503297	0.53933	0.561206	0.671048	0.579105	0.535482	0.639888	0.500562	0.566049	0.637141	0.519729	0.481162	0.483002	0.445139	0.280786	0.334657		1.07482e-09	1.11583e-09	7.87534e-10	6.8228e-10	5.35776e-10	1.82277e-09	5.81677e-09	9.18519e-09	8.82332e-09	1.04162e-08	1.14323e-08	1.16568e-08	1.22611e-08	1.30044e-08	1.30062e-08
	Romania	0.727784	0.670888	0.67767	0.707986	0.691753	0.745034	0.768152	0.76753	0.758711	0.770167	0.74584	0.66808	0.714031	0.707791	0.711774	0.674323	0.678349	0.573187	0.52067	0.518828	0.601309	0.617882	0.602229	0.671234	0.602135	0.563965	0.614516	0.616169	0.570041	0.53249	0.472423	0.558697		5.90961e-08	2.58964e-08	2.75211e-08	3.04327e-08	2.92438e-08	5.96051e-08	5.93233e-08	6.23598e-08	7.06383e-08	6.94666e-08	5.46249e-08	5.2084e-08	6.4004e-08	6.47306e-08	6.68995e-08
	Belgium	0.684955	0.682787	0.662122	0.512133	0.477678	0.380622	0.321074	0.323176	0.32843	0.361106	0.366922	0.363983	0.351047	0.360584	0.379918	0.372218	0.354315	0.321729	0.346645	0.292314	0.31671	0.292877	0.288642	0.289747	0.288206	0.277981	0.254732	0.238017	0.218217	0.20449	0.203935	0.161088		7.47285e-09	8.75186e-09	9.52031e-09	8.74966e-09	9.24455e-09	7.88321e-09	7.48752e-09	7.4723e-09	7.6688e-09	7.82565e-09	8.10793e-09	7.80807e-09	7.57268e-09	7.71068e-09	7.82254e-09
	Slovakia	NA	NA	NA	NA	NA	NA	NA	NA	NA	NA	NA	NA	NA	0.435114	0.397802	0.459232	0.450769	0.473207	0.457897	0.44261	0.370403	0.366524	0.330353	0.376676	0.373784	0.349865	0.319713	0.319256	0.30514	0.302382	0.278822	0.289932		NA	NA	NA	NA	NA	NA	NA	NA	NA	NA	NA	NA	NA	3.46516e-08	2.98075e-08
	Germany	0.865756	0.86033	0.852428	0.857966	0.818292	0.767406	0.781673	0.758917	0.738165	0.732614	0.741408	0.743143	0.711908	0.71098	0.701608	0.692478	0.685517	0.666548	0.674142	0.653386	0.653206	0.638642	0.641887	0.647659	0.621607	0.623124	0.59291	0.586513	0.558881	0.506911	0.497043	0.499997		7.03536e-08	7.26757e-08	7.37776e-08	7.55381e-08	7.31429e-08	6.94463e-08	6.9815e-08	6.73863e-08	6.60028e-08	6.53654e-08	6.59564e-08	6.57091e-08	6.33836e-08	6.36289e-08	6.25616e-08
	Greece	0.918824	0.961123	0.961198	1.04733	1.02553	1.05472	1.05487	1.08478	1.12471	1.14213	1.14231	1.08134	1.12078	1.13002	1.12916	1.09101	1.07354	1.09274	1.09346	1.05478	1.06577	1.09808	1.07241	1.02484	1.02158	1.01655	0.971058	1.02306	0.996719	0.972151	0.914158	0.93068		1.33633e-07	1.57318e-07	1.61483e-07	1.8454e-07	1.80813e-07	1.90959e-07	1.98934e-07	2.05052e-07	2.18996e-07	2.19996e-07	2.16764e-07	1.98371e-07	2.13028e-07	2.17605e-07	2.18735e-07
	Luxembourg	0.796183	0.738635	0.59933	0.64062	0.745928	0.791934	0.709376	0.712719	0.68574	0.837328	0.844271	0.833455	0.79671	0.835526	0.733086	0.560785	0.589171	0.469477	0.30186	0.348583	0.294082	0.363795	0.82215	0.82001	0.816127	0.813	0.802307	0.780252	0.744451	0.762738	0.760654	0.710259		3.00924e-08	3.1929e-08	3.0045e-08	3.07601e-08	3.65927e-08	3.97811e-08	3.5889e-08	3.10191e-08	3.30957e-08	3.92574e-08	4.05372e-08	4.06879e-08	3.84729e-08	4.09832e-08	3.34905e-08
	Netherlands	0.625352	0.644338	0.69246	0.697228	0.706952	0.692311	0.682717	0.694107	0.732273	0.718879	0.739808	0.717299	0.707896	0.694328	0.708469	0.712273	0.680817	0.675139	0.671705	0.639702	0.641964	0.640654	0.627584	0.63575	0.607334	0.55649	0.554845	0.580644	0.547427	0.521464	0.505995	0.486883		3.5367e-09	4.08229e-09	6.45948e-09	7.11447e-09	7.51218e-09	7.33584e-09	7.01232e-09	7.35709e-09	9.03202e-09	8.62775e-09	9.50578e-09	8.49908e-09	8.25512e-09	7.89938e-09	8.51265e-09
	Faeroe Islands	0.653171	0.653171	0.670343	0.670343	0.685369	0.698627	0.698627	0.698627	0.640292	0.595215	0.578608	0.578608	0.510069	0.539532	0.51633	0.51633	0.572676	0.539532	0.539532	0.610241	0.578608	0.610241	0.541942	0.597175	0.541942	0.501488	0.519282	0.514538	0.5506	0.5506	0.658785	0.5506		1.57861e-09	1.57861e-09	1.59844e-09	1.59844e-09	1.61579e-09	1.6311e-09	1.6311e-09	1.6311e-09	1.56374e-09	1.51169e-09	1.49251e-09	1.49251e-09	1.41337e-09	1.44739e-09	1.4206e-09
	Iceland	0.0215891	0.0252731	0.0142478	0.0118935	0.0117906	0.0118376	0.0121163	0.0123237	0.0122671	0.0123516	0.0127441	0.0125067	0.0118435	0.0120967	0.0120661	0.0122983	0.0127681	0.0127762	0.0148305	0.0177115	0.0184959	0.0189481	0.0184325	0.0181426	0.0184793	0.0195434	0.0235722	0.0254712	0.0225088	0.0244691	0.0239729	0.0246215		9.7365e-10	1.16493e-09	1.19077e-09	1.2119e-09	1.19745e-09	1.20405e-09	1.24323e-09	1.27239e-09	1.26444e-09	1.27631e-09	1.33149e-09	1.29812e-09	1.20488e-09	1.24048e-09	1.23618e-09
	Croatia	NA	NA	NA	NA	NA	NA	NA	NA	NA	NA	NA	NA	0.407999	0.424675	0.292645	0.335902	0.24241	0.378451	0.417463	0.388892	0.386484	0.391553	0.472544	0.536289	0.39962	0.429141	0.443487	0.54512	0.490374	0.386768	0.3298	0.282278		NA	NA	NA	NA	NA	NA	NA	NA	NA	NA	NA	NA	1.21168e-09	3.12497e-09	1.59446e-09
	Austria	0.246037	0.236572	0.232778	0.235847	0.249814	0.238374	0.233159	0.27987	0.204168	0.226813	0.280981	0.29971	0.231484	0.20015	0.229992	0.22718	0.260089	0.254252	0.234174	0.21871	0.215778	0.246795	0.247275	0.317485	0.284757	0.279522	0.247924	0.207749	0.202856	0.179883	0.222885	0.196424		2.95339e-09	3.76246e-09	3.63452e-09	3.69038e-09	4.05644e-09	4.01766e-09	3.75578e-09	4.60371e-09	3.53028e-09	3.98231e-09	4.88281e-09	5.17191e-09	3.89494e-09	3.10133e-09	3.57443e-09
	Turkey	0.584724	0.543939	0.545801	0.67689	0.656375	0.762925	0.780227	0.610853	0.424174	0.639924	0.603383	0.618307	0.619479	0.549624	0.616888	0.579222	0.568933	0.598942	0.60022	0.65309	0.681281	0.723248	0.644244	0.633408	0.591541	0.646797	0.637209	0.690149	0.709916	0.686306	0.621162	0.641498		3.88556e-08	3.66873e-08	3.72575e-08	4.74139e-08	5.00109e-08	6.57693e-08	7.02461e-08	5.51193e-08	3.77084e-08	5.44832e-08	5.11618e-08	5.22659e-08	5.31474e-08	4.68368e-08	5.25571e-08
	Montenegro	NA	NA	NA	NA	NA	NA	NA	NA	NA	NA	NA	NA	NA	NA	NA	NA	NA	NA	NA	NA	NA	NA	NA	NA	NA	NA	0.444138	0.467755	0.494428	0.28096	0.355066	0.393624		NA	NA	NA	NA	NA	NA	NA	NA	NA	NA	NA	NA	NA	NA	NA
	Switzerland	0.0232818	0.0206269	0.0206944	0.0211401	0.0204938	0.0203306	0.0208488	0.020871	0.0107534	0.0224672	0.0120411	0.015554	0.0162514	0.0115743	0.0152552	0.0164547	0.0129158	0.0122801	0.0145028	0.0119899	0.0114117	0.00981301	0.00960836	0.0102688	0.00910292	0.00736712	0.00517837	0.00442556	0.00306278	0.00208042	0.00477198	0.0045824		1.57939e-09	1.61682e-09	1.58809e-09	1.60332e-09	1.8012e-09	1.87777e-09	1.83091e-09	1.75016e-09	1.69272e-09	1.89006e-09	1.81368e-09	1.7364e-09	1.7379e-09	1.68815e-09	1.67615e-09
	Ireland	0.703105	0.650062	0.61179	0.595265	0.596539	0.596989	0.752355	0.906674	0.876249	0.891173	0.892129	0.885796	0.90344	0.881971	0.873943	0.879042	0.85556	0.838695	0.821119	0.797969	0.788296	0.800955	0.767908	0.740413	0.734842	0.735802	0.690865	0.664994	0.634252	0.581725	0.584105	0.559879		9.70192e-10	1.07089e-09	1.40319e-09	1.54403e-09	1.57091e-09	1.68981e-09	8.09611e-09	2.15087e-08	2.28621e-08	2.36769e-08	2.26661e-08	2.10224e-08	2.23992e-08	2.12273e-08	2.05306e-08
	United Kingdom	1.03294	1.02737	0.996337	0.975462	0.931651	0.935902	0.956769	0.953333	0.930177	0.902889	0.908421	0.899434	0.854391	0.763886	0.723909	0.706525	0.677707	0.604629	0.600061	0.565774	0.601352	0.595714	0.577359	0.596438	0.590053	0.581633	0.615844	0.606736	0.601306	0.525724	0.540157	0.506547		3.32737e-08	3.3997e-08	3.28096e-08	3.23612e-08	2.15062e-08	2.80327e-08	3.11468e-08	3.15846e-08	3.05358e-08	2.95381e-08	2.92231e-08	2.96978e-08	2.75378e-08	2.4321e-08	2.26779e-08
	Slovenia	NA	NA	NA	NA	NA	NA	NA	NA	NA	NA	NA	NA	0.45518	0.459157	0.41913	0.424661	0.399126	0.434898	0.433672	0.405519	0.405234	0.409776	0.432267	0.441924	0.403898	0.41573	0.428961	0.438085	0.386784	0.384192	0.39038	0.401616		NA	NA	NA	NA	NA	NA	NA	NA	NA	NA	NA	NA	5.7727e-08	5.86368e-08	5.35002e-08
	Bulgaria	0.774692	0.712407	0.720387	0.691407	0.701172	0.652296	0.694368	0.699185	0.596463	0.610693	0.681311	0.66776	0.683176	0.637059	0.618403	0.583313	0.552179	0.591755	0.58371	0.572009	0.549689	0.585556	0.519332	0.596	0.59443	0.54621	0.545976	0.672568	0.659122	0.628948	0.617478	0.606272		7.62426e-08	7.11561e-08	7.3065e-08	7.00905e-08	7.0879e-08	5.75546e-08	6.57916e-08	6.85922e-08	5.64632e-08	5.78515e-08	7.73908e-08	7.6097e-08	7.7047e-08	7.01086e-08	6.89894e-08
	Finland	0.48484	0.244351	0.230598	0.229009	0.258482	0.333337	0.323307	0.333803	0.255517	0.352059	0.384312	0.380075	0.19731	0.222625	0.28625	0.248832	0.322065	0.249939	0.158483	0.192362	0.175897	0.233723	0.242316	0.320143	0.264944	0.152413	0.268639	0.244364	0.161534	0.198763	0.227391	0.174525		1.41483e-08	7.15994e-09	7.39915e-09	7.88673e-09	8.79347e-09	1.11941e-08	1.06776e-08	1.09455e-08	8.68922e-09	1.0935e-08	1.15725e-08	1.15871e-08	6.14249e-09	7.05016e-09	8.97497e-09
	Albania	0.186035	0.169323	0.153754	0.140789	0.127646	0.119215	0.113602	0.0626217	0.0575097	0.0601599	0.10109	0.0464666	0.0419962	0.051145	0.0373128	0.0485905	0.0370001	0.0339126	0.0326529	0.0261273	0.0343093	0.0390159	0.0489502	0.0179487	0.0223501	0.0192859	0.0235515	0.0283946	0.0210752	0.00921284	0.00921284	0.00921284		1.03921e-09	1.01991e-09	1.00193e-09	9.86962e-10	9.71786e-10	9.62051e-10	9.55569e-10	8.96702e-10	8.90799e-10	8.93859e-10	9.41121e-10	8.78048e-10	8.72886e-10	8.8345e-10	8.67478e-10
	Spain	0.683854	0.719303	0.709004	0.701193	0.58251	0.575956	0.551837	0.515336	0.395104	0.527737	0.511965	0.501584	0.56106	0.522438	0.510794	0.548395	0.446431	0.496638	0.491348	0.56729	0.550002	0.495525	0.561955	0.493279	0.519003	0.554349	0.498382	0.501796	0.443709	0.397152	0.317449	0.37064		1.21224e-08	1.39352e-08	1.57883e-08	1.70528e-08	1.70243e-08	1.79303e-08	1.77412e-08	1.67183e-08	1.28497e-08	1.68485e-08	1.64232e-08	1.5835e-08	1.69841e-08	1.66749e-08	1.59567e-08
Middle East	Qatar	0.725352	0.724166	0.724026	0.722699	0.723221	0.721722	0.721915	0.721884	0.720226	0.720226	0.720226	0.720226	0.720226	0.720226	0.720226	0.720226	0.720226	0.720226	0.720226	0.720226	0.720226	0.720226	0.720226	0.720226	0.720226	0.720226	0.720226	0.720226	0.720226	0.720226	0.720226	0.720226		6.12753e-09	6.15475e-09	6.15795e-09	6.18837e-09	6.17641e-09	6.21078e-09	6.20635e-09	6.20706e-09	6.24508e-09	6.24508e-09	6.24508e-09	6.24508e-09	6.24508e-09	6.24508e-09	6.24508e-09
	Iraq	0.813	0.830748	0.846237	0.865381	0.868549	0.868728	0.870801	0.869357	0.844057	0.843717	0.852112	0.86539	0.852192	0.854193	0.850983	0.853719	0.853383	0.855934	0.85797	0.85533	0.857014	0.861679	0.87175	0.876629	0.885303	0.809773	0.767645	0.776262	0.762001	0.70146	0.686628	0.663359		2.74155e-09	2.2785e-09	2.34239e-09	2.07643e-09	2.09077e-09	2.18043e-09	2.18158e-09	2.25466e-09	2.81612e-09	2.94212e-09	2.59169e-09	2.57363e-09	2.58968e-09	2.65523e-09	2.79327e-09
	Saudi Arabia	0.845642	0.826767	0.818069	0.822896	0.821315	0.823042	0.819478	0.812232	0.809745	0.812878	0.812407	0.811308	0.805935	0.805402	0.806962	0.803279	0.80141	0.801856	0.798734	0.797811	0.804441	0.814795	0.820221	0.818612	0.821986	0.821264	0.816059	0.81121	0.808934	0.829719	0.836096	0.830276		2.96157e-09	2.72451e-09	2.61525e-09	2.67588e-09	2.65602e-09	2.67772e-09	2.63295e-09	2.54193e-09	2.5107e-09	2.55005e-09	2.54414e-09	2.53033e-09	2.46284e-09	2.45616e-09	2.47575e-09
	Lebanon	0.621711	0.626057	0.700176	0.730446	0.729811	0.716104	0.732392	0.720956	0.71873	0.734756	0.80227	0.75185	0.767569	0.767557	0.763564	0.787184	0.802515	0.810957	0.822548	0.873288	0.857004	0.879634	0.856042	0.809746	0.826427	0.831524	0.854615	0.865479	0.884894	0.865689	0.848294	0.853901		1.54229e-09	1.5473e-09	1.63289e-09	1.66784e-09	1.66711e-09	1.65128e-09	1.67009e-09	1.65689e-09	1.65431e-09	1.67282e-09	1.75078e-09	1.69256e-09	1.71071e-09	1.71069e-09	1.70608e-09
	United Arab Emirates	0.727296	0.727355	0.7273	0.727309	0.727311	0.727292	0.727334	0.7273	0.727313	0.727292	0.727299	0.727287	0.727281	0.727293	0.727298	0.726145	0.726651	0.728102	0.727187	0.726682	0.726117	0.725562	0.725496	0.725459	0.724679	0.724298	0.724102	0.723779	0.723471	0.723337	0.723291	0.723279		6.08295e-09	6.0816e-09	6.08286e-09	6.08266e-09	6.08263e-09	6.08306e-09	6.0821e-09	6.08288e-09	6.08256e-09	6.08304e-09	6.0829e-09	6.08317e-09	6.08331e-09	6.08302e-09	6.08291e-09
	Kuwait	0.803845	0.810839	0.84978	0.848561	0.850006	0.858899	0.84621	0.845873	0.851503	0.843887	0.82588	0.891949	0.838549	0.792045	0.805906	0.808873	0.791816	0.798401	0.83109	0.849184	0.848031	0.852272	0.868878	0.863872	0.85801	0.862972	0.850943	0.850016	0.842826	0.855837	0.844785	0.83833		4.3276e-09	4.16722e-09	3.27426e-09	3.30221e-09	3.26908e-09	3.06515e-09	3.35613e-09	3.36386e-09	3.23475e-09	3.4094e-09	3.82233e-09	2.30728e-09	3.5318e-09	4.59819e-09	4.28034e-09
	Israel	0.910755	0.910755	0.954423	0.989852	1.03104	1.04171	1.04436	1.03377	1.02266	1.02541	1.03131	1.0392	1.05007	1.05916	1.05553	1.06051	1.07683	1.08133	1.07885	1.0718	1.0756	1.09117	1.09632	1.09511	1.07903	1.06777	1.04693	1.0405	1.00894	0.996771	0.977617	0.983185		1.87605e-09	1.87605e-09	1.23492e-08	2.08461e-08	3.07234e-08	3.32842e-08	3.392e-08	3.15099e-08	2.8832e-08	2.93729e-08	3.07898e-08	3.26814e-08	3.54728e-08	3.77331e-08	3.68408e-08
	Iran (Islamic Republic of)	0.928223	0.926185	0.874176	1.05245	1.05753	1.11293	1.09889	0.929593	0.970393	0.92881	0.915255	0.912943	0.859136	0.894141	0.923114	0.943492	0.949159	0.927417	0.850686	0.889275	0.935933	0.911671	0.871123	0.843607	0.86035	0.810864	0.837642	0.845083	0.860965	0.811263	0.799822	0.865846		2.43707e-09	2.43697e-09	2.43419e-09	2.61129e-09	2.63814e-09	2.67823e-09	2.6705e-09	2.54769e-09	2.6181e-09	2.58725e-09	2.62494e-09	2.61384e-09	2.53652e-09	2.57466e-09	2.64684e-09
	Oman	0.76122	0.769589	0.77303	0.771899	0.771922	0.76988	0.762526	0.760556	0.756332	0.754189	0.755233	0.75619	0.755999	0.756157	0.756746	0.757423	0.753475	0.751599	0.751849	0.752023	0.752933	0.753882	0.754529	0.75453	0.754524	0.754527	0.754515	0.754522	0.754524	0.75452	0.754517	0.754519		5.30504e-09	5.11314e-09	5.03422e-09	5.06016e-09	5.05963e-09	5.10647e-09	5.2751e-09	5.32027e-09	5.41713e-09	5.46628e-09	5.44233e-09	5.42039e-09	5.42476e-09	5.42116e-09	5.40765e-09
	Bahrain	0.720226	0.720226	0.720226	0.720226	0.720226	0.720226	0.720226	0.720226	0.720226	0.720226	0.720226	0.720226	0.720226	0.720226	0.720226	0.720226	0.720226	0.720226	0.720226	0.720226	0.720226	0.720226	0.720226	0.720226	0.720226	0.720226	0.730276	0.724646	0.720306	0.720226	0.720226	0.720226		6.24508e-09	6.24508e-09	6.24508e-09	6.24508e-09	6.24508e-09	6.24508e-09	6.24508e-09	6.24508e-09	6.24508e-09	6.24508e-09	6.24508e-09	6.24508e-09	6.24508e-09	6.24508e-09	6.24508e-09
	Yemen	0.910755	0.910755	0.910755	0.910755	0.910755	0.910755	0.910755	0.910755	0.910755	0.910755	0.910755	0.910755	0.910755	0.910755	0.910755	0.910755	0.910755	0.910755	0.910755	0.910755	0.910755	0.910755	0.910755	0.910755	0.910755	0.910755	0.910755	0.910755	0.910755	0.910755	0.86015	0.869554		1.87605e-09	1.87605e-09	1.87605e-09	1.87605e-09	1.87605e-09	1.87605e-09	1.87605e-09	1.87605e-09	1.87605e-09	1.87605e-09	1.87605e-09	1.87605e-09	1.87605e-09	1.87605e-09	1.87605e-09
	Jordan	0.910755	0.910755	0.910755	0.910755	0.910755	0.910755	0.910755	0.907177	0.903513	0.892331	0.885426	0.889272	0.888911	0.885143	0.879821	0.883731	0.884652	0.885733	0.889909	0.889631	0.887651	0.886238	0.8889	0.88815	0.809799	0.801286	0.772609	0.760556	0.752918	0.733838	0.771172	0.854893		1.87605e-09	1.87605e-09	1.87605e-09	1.87605e-09	1.87605e-09	1.87605e-09	1.87605e-09	1.87192e-09	1.86768e-09	2.23109e-09	2.39319e-09	2.36868e-09	2.32462e-09	2.36619e-09	2.53977e-09
	Syrian Arab Republic	0.291771	0.367986	0.44383	0.568217	0.544572	0.565816	0.606687	0.594566	0.562903	0.570176	0.582982	0.564295	0.543661	0.576041	0.644319	0.697547	0.711644	0.714446	0.72937	0.734805	0.719945	0.712238	0.714233	0.728818	0.708543	0.743085	0.737825	0.765711	0.785149	0.78326	0.753565	0.746617		1.30191e-09	1.37249e-09	1.43975e-09	1.62451e-09	1.70703e-09	1.75253e-09	1.83363e-09	1.81964e-09	1.90979e-09	2.26728e-09	2.32852e-09	2.82037e-09	2.70696e-09	2.69565e-09	2.71908e-09
North America	United States of America	0.819794	0.822805	0.79948	0.800526	0.8041	0.807549	0.795339	0.805928	0.806291	0.785593	0.766396	0.755314	0.764634	0.768728	0.764947	0.747133	0.751693	0.765589	0.767584	0.757219	0.77011	0.770749	0.759396	0.766503	0.762351	0.766684	0.75494	0.759216	0.751122	0.720661	0.728533	0.701733		3.17511e-08	3.27179e-08	3.31111e-08	3.3851e-08	3.44781e-08	3.52368e-08	3.46032e-08	3.5344e-08	3.53935e-08	3.35388e-08	3.32158e-08	3.26759e-08	3.31836e-08	3.31846e-08	3.2721e-08
	Saint Pierre and Miquelon	1.03383	1.03976	1.05125	1.06156	1.0644	1.0694	1.07347	1.07402	1.07752	1.06126	1.06342	1.06166	1.05985	1.05892	1.05281	1.04995	1.0599	1.05752	1.04968	1.04796	1.04659	1.03745	1.03543	1.03976	1.03303	1.03093	1.02669	1.01921	1.02078	1.00531	1.00328	0.994067		4.10943e-08	4.24831e-08	4.46609e-08	4.60582e-08	4.69285e-08	4.78631e-08	4.77988e-08	4.81825e-08	4.8268e-08	4.61517e-08	4.69343e-08	4.68104e-08	4.68386e-08	4.6589e-08	4.59621e-08
	Canada	0.225468	0.209993	0.230447	0.220995	0.221237	0.204141	0.182865	0.205937	0.224914	0.250288	0.223281	0.217346	0.224274	0.19982	0.194324	0.204381	0.196832	0.220995	0.254567	0.245079	0.254215	0.270115	0.255938	0.266794	0.249127	0.237214	0.226513	0.238	0.232577	0.20673	0.213386	0.195404		1.15286e-08	1.14744e-08	1.26298e-08	1.26783e-08	1.3526e-08	1.23273e-08	1.10755e-08	1.21733e-08	1.29463e-08	1.31381e-08	1.19933e-08	1.22457e-08	1.21654e-08	1.1006e-08	1.11379e-08
	Greenland	1.03383	1.03976	1.05125	1.06156	1.0644	1.0694	1.07347	1.07402	1.07752	1.06126	1.06342	1.06166	1.05985	1.05892	1.05281	1.04995	1.0599	1.05752	1.04968	1.04796	1.04659	1.03745	1.03543	1.03976	1.03303	1.03093	1.02669	1.01921	1.02078	1.00531	1.00328	0.994067		4.10943e-08	4.24831e-08	4.46609e-08	4.60582e-08	4.69285e-08	4.78631e-08	4.77988e-08	4.81825e-08	4.8268e-08	4.61517e-08	4.69343e-08	4.68104e-08	4.68386e-08	4.6589e-08	4.59621e-08
	Bermuda	1.03383	1.03976	1.05125	1.06156	1.0644	1.0694	1.07347	1.07402	1.07752	1.06126	1.06342	1.06166	1.05985	1.05892	1.05281	1.04995	1.0599	1.05752	1.04968	1.04796	1.04659	1.03745	1.03543	1.03976	1.03303	1.03093	1.02669	1.01921	1.02078	1.00531	1.00328	0.994067		4.10943e-08	4.24831e-08	4.46609e-08	4.60582e-08	4.69285e-08	4.78631e-08	4.77988e-08	4.81825e-08	4.8268e-08	4.61517e-08	4.69343e-08	4.68104e-08	4.68386e-08	4.6589e-08	4.59621e-08
	Mexico	0.768014	0.707391	0.757483	0.806157	0.788779	0.780218	0.846883	0.870469	0.856434	0.836081	0.797109	0.776151	0.742326	0.745068	0.825001	0.738713	0.741621	0.786767	0.806679	0.765999	0.767241	0.779696	0.75578	0.731	0.727359	0.724755	0.693627	0.695054	0.637579	0.673981	0.6591	0.656621		2.10629e-09	2.02733e-09	3.64793e-09	5.03109e-09	5.62206e-09	6.14756e-09	8.68342e-09	9.25652e-09	9.49247e-09	8.89329e-09	8.98783e-09	9.14234e-09	9.00558e-09	1.03598e-08	1.1588e-08
REGIONS	North America	0.73828	0.735085	0.718618	0.718285	0.718852	0.717076	0.705008	0.716298	0.721692	0.714536	0.697252	0.684088	0.690487	0.691432	0.688844	0.673922	0.677057	0.69455	0.704761	0.692843	0.703878	0.707846	0.696206	0.703785	0.698343	0.699124	0.687662	0.69162	0.680972	0.65421	0.663706	0.636503		2.83264e-08	2.89671e-08	2.93706e-08	2.99947e-08	3.05777e-08	3.09358e-08	3.02461e-08	3.09386e-08	3.12035e-08	2.99554e-08	2.96972e-08	2.91693e-08	2.95116e-08	2.94237e-08	2.89991e-08
	Africa	0.717001	0.773017	0.785842	0.797986	0.81722	0.813416	0.798988	0.820599	0.801415	0.801412	0.805744	0.799744	0.799979	0.814861	0.808998	0.803364	0.801886	0.803287	0.801087	0.773763	0.772445	0.767441	0.763242	0.773395	0.774999	0.774816	0.778321	0.777302	0.773684	0.761399	0.754532	0.74235		3.43663e-08	3.69089e-08	3.75259e-08	3.70221e-08	3.69961e-08	3.59521e-08	3.48674e-08	3.56702e-08	3.47123e-08	3.45625e-08	3.50297e-08	3.455e-08	3.42193e-08	3.51535e-08	3.46869e-08
	Central and South America	0.334631	0.340328	0.321632	0.303164	0.288306	0.274978	0.277607	0.269933	0.278173	0.278747	0.254129	0.248409	0.248783	0.243477	0.232564	0.249319	0.249617	0.253096	0.264872	0.275936	0.270035	0.271137	0.259747	0.260443	0.265786	0.258052	0.258518	0.265741	0.271942	0.249494	0.255462	0.250882		3.88711e-09	4.45421e-09	4.10765e-09	3.54076e-09	4.06481e-09	4.16904e-09	4.35814e-09	4.06467e-09	4.13012e-09	4.67007e-09	4.23871e-09	4.2807e-09	3.71914e-09	3.72364e-09	3.67803e-09
	Europe	0.681193	0.649302	0.644905	0.626454	0.592737	0.575019	0.574679	0.564035	0.535327	0.552997	0.549841	0.542334	0.527955	0.509689	0.507078	0.505467	0.502912	0.486317	0.486011	0.474342	0.479431	0.473436	0.476786	0.48891	0.471516	0.468635	0.467667	0.467846	0.446726	0.41576	0.39708	0.394724		3.48011e-08	3.404e-08	3.47923e-08	3.52647e-08	3.37168e-08	3.43456e-08	3.48494e-08	3.41256e-08	3.34813e-08	3.30673e-08	3.25165e-08	3.13463e-08	3.2295e-08	3.28012e-08	3.25093e-08
	Asia and Oceania	0.75786	0.757691	0.751928	0.747552	0.759428	0.769583	0.781334	0.79905	0.80465	0.814589	0.826256	0.841326	0.86178	0.860363	0.860371	0.861075	0.874277	0.875247	0.871395	0.886365	0.904333	0.907481	0.927566	0.951806	0.949161	0.954345	0.969162	0.996532	0.99071	0.96353	0.952269	0.98199		1.89234e-08	1.94374e-08	1.98799e-08	2.00748e-08	2.09451e-08	2.24759e-08	2.36057e-08	2.4333e-08	2.43697e-08	2.47048e-08	2.54162e-08	2.57672e-08	2.57576e-08	2.54119e-08	2.49869e-08
	Eurasia	0.849584	0.849174	0.847738	0.843298	0.815446	0.803532	0.804437	0.795392	0.776652	0.781332	0.781238	0.774641	0.757093	0.724951	0.72465	0.723519	0.703708	0.693186	0.696201	0.680829	0.67623	0.661563	0.661249	0.662787	0.634312	0.639931	0.660795	0.651211	0.674759	0.644129	0.646802	0.657643		2.83311e-08	2.83063e-08	2.83063e-08	2.81739e-08	2.73078e-08	2.69537e-08	2.69616e-08	2.66938e-08	2.61165e-08	2.62753e-08	2.6258e-08	2.6218e-08	2.48727e-08	2.49969e-08	2.72929e-08
	Middle East	0.823855	0.824577	0.822019	0.87399	0.877369	0.887852	0.882492	0.845547	0.85318	0.844828	0.844847	0.849606	0.833809	0.841084	0.850076	0.852374	0.854175	0.85121	0.83332	0.844195	0.858268	0.856088	0.847848	0.838748	0.840045	0.821663	0.822511	0.823584	0.823894	0.809645	0.80305	0.816304		3.03876e-09	2.90385e-09	3.95052e-09	4.781e-09	5.53697e-09	5.68238e-09	5.73261e-09	5.58585e-09	5.37658e-09	5.47436e-09	5.56647e-09	5.70578e-09	6.06157e-09	6.21581e-09	6.13289e-09
	World	0.729492	0.720971	0.713973	0.708053	0.697043	0.691236	0.687713	0.691075	0.68513	0.691029	0.687039	0.682943	0.68272	0.674524	0.674119	0.67007	0.67161	0.674189	0.677035	0.674134	0.683734	0.685987	0.690348	0.704856	0.701011	0.705797	0.713325	0.727598	0.722542	0.709313	0.707956	0.721207		2.74575e-08	2.75629e-08	2.78296e-08	2.80544e-08	2.78251e-08	2.82226e-08	2.82049e-08	2.82931e-08	2.80229e-08	2.76336e-08	2.75078e-08	2.70873e-08	2.71758e-08	2.72027e-08	2.70657e-08
[truncated: 273 more columns]

## Sheet: Table_S5
TIME DIFFERENTIATED NORMALISED IMPACT INTENSITIES (WORLD AS REFERENCE): RATIO SORTED ACROSS COUNTRIES FOR EACH YEAR AND IMPACT CATEGORY		Climate change																																Climate change	Human toxicity - cancer effects
		1980	1981	1982	1983	1984	1985	1986	1987	1988	1989	1990	1991	1992	1993	1994	1995	1996	1997	1998	1999	2000	2001	2002	2003	2004	2005	2006	2007	2008	2009	2010	2011		1980	1981	1982	1983	1984	1985	1986	1987	1988	1989	1990	1991	1992	1993	1994
	Color scale	0	1	3	4	5	6	7	8
		Smallest							Largest
Africa	Mali	0.246438	0.248964	0.210255	0.185635	0.242187	0.24472	0.275162	0.303167	0.386786	0.380073	0.312082	0.312587	0.288982	0.31566	0.23688	0.338218	0.430647	0.502665	0.485794	0.502663	0.495338	0.493603	0.487043	0.535439	0.529111	0.509685	0.507901	0.498547	0.48969	0.478964	0.472129	0.460843		0.0540109	0.054407	0.0493174	0.0450914	0.0498115	0.0479731	0.0533396	0.0609561	0.0690473	0.0683163	0.0644806	0.0645336	0.0613091	0.066026	0.0578919
	Democratic Republic of the Congo	0.0635336	0.0595244	0.0547945	0.0465922	0.0484664	0.0465735	0.0453702	0.0476614	0.0456016	0.0200111	0.0181128	0.0185477	0.0156952	0.0160973	0.0162139	0.0159547	0.01594	0.0163503	0.016459	0.0162135	0.0156941	0.01565	0.0155038	0.0172572	0.0168062	0.0165383	0.0143608	0.0166316	0.0185651	0.0170521	0.0170535	0.0167099		0.0319734	0.0317074	0.0312461	0.0307433	0.0310296	0.0305275	0.0305061	0.0304818	0.030706	0.0304108	0.0304918	0.0309746	0.0307908	0.0307664	0.0309253
	Swaziland	0.855652	0.918013	1.03671	1.18612	0.973707	0.839466	0.982162	0.861998	0.824413	0.819615	0.942441	0.849715	0.849992	0.86032	0.860534	0.865637	0.864053	0.840087	0.857129	0.860817	0.96263	0.959463	0.932509	1.10797	1.14875	0.992477	1.02826	0.960917	0.976527	0.907544	0.868935	0.819435		1.18226	1.24813	1.38097	1.55239	1.26737	1.0702	1.24442	1.0956	1.04945	1.0674	1.22398	1.11538	1.11175	1.11065	1.11446
	Chad	1.18167	1.1937	1.19701	1.22138	1.23439	1.24742	1.25678	1.23064	1.24013	1.21834	1.2081	1.20988	1.20727	1.22167	1.21902	1.23051	1.2266	1.21986	1.20981	1.2056	1.18802	1.18385	1.16798	1.13616	1.14827	1.13048	1.12074	1.10012	1.1029	1.10027	1.0982	1.08424		0.148407	0.150853	0.145879	0.137052	0.135618	0.127645	0.142341	0.161572	0.15876	0.155398	0.166854	0.165652	0.163249	0.172014	0.176867
	Sao Tome and Principe	NA	NA	NA	NA	NA	NA	NA	NA	NA	NA	NA	NA	NA	NA	1.66808	1.6785	1.6745	1.66604	1.65686	1.65953	0.825107	1.63128	1.61481	1.58253	1.58631	1.57176	1.55123	1.14319	1.02576	1.04409	1.0405	1.01777		NA	NA	NA	NA	NA	NA	NA	NA	NA	NA	NA	NA	NA	NA	2.04609
	Egypt	0.53991	0.589345	0.564206	0.650331	0.790629	0.903223	0.92159	0.933705	0.943208	0.947831	0.889089	0.926766	0.927401	0.891777	0.891229	0.901902	0.895209	0.907181	0.933707	0.869232	0.894653	0.893126	0.910447	0.893196	0.933668	0.929183	0.93044	0.905151	0.926204	0.966553	0.96952	0.930668		0.0798782	0.0837533	0.0803397	0.0875169	0.100227	0.108328	0.109571	0.110982	0.112242	0.115017	0.130022	0.143563	0.148023	0.156114	0.161485
	Congo	0.454004	0.429597	0.145821	0.0130115	0.013217	0.0133281	0.0133963	0.0133312	0.0134469	0.0133321	0.0134095	0.0134899	0.0134943	0.0136583	0.0136665	0.0137491	0.0137176	0.0136651	0.0136076	0.0136662	0.0134743	0.0134301	0.0133452	0.181366	0.216204	0.225943	0.188223	0.170835	0.205017	0.403585	0.246448	0.103226		0.0439524	0.0428851	0.0339426	0.0297646	0.0300099	0.0295873	0.0296059	0.0295136	0.0297982	0.030218	0.0303562	0.0308274	0.0307269	0.0306966	0.030852
	Ethiopia	0.340901	0.330058	0.302986	0.274195	0.24696	0.220822	0.180749	0.264667	0.251665	0.250539	0.134707	0.134498	0.111714	0.181897	0.0978363	0.0417792	0.0488119	0.0473059	0.0475078	0.0225437	0.0294568	0.0200676	0.0262751	0.01873	0.0182865	0.0175988	0.0129153	0.0657648	0.157967	0.146669	0.0183615	0.0823256		0.0404826	0.0398786	0.0385985	0.0373763	0.0367713	0.0354555	0.0343177	0.0366023	0.0365234	0.0370674	0.0338544	0.0343503	0.0335762	0.0355137	0.0332727
	Réunion	0.152196	0.053646	0.0129036	0.180659	0.334253	0.219373	0.289309	0.35638	0.729258	0.614762	0.630072	0.867668	0.886791	0.897774	0.910453	0.962948	0.745742	0.8258	0.669096	0.675317	0.666121	0.663888	0.663615	0.646828	0.663554	0.668606	0.673852	0.633212	0.504373	0.515707	0.512289	0.500036		0.21216	0.0828655	0.0300051	0.236486	0.424399	0.277564	0.359484	0.439243	0.887516	0.768717	0.786429	1.09204	1.10777	1.10784	1.12323
	Gambia	1.54786	1.56575	1.58054	1.5889	1.6184	1.63225	1.64128	1.63056	1.64639	1.63097	1.63916	1.65212	1.65093	1.67138	1.66808	1.6785	1.6745	1.66604	1.65686	1.65953	1.63674	1.63128	1.61481	1.58253	1.58631	1.57176	1.55123	1.52004	1.53227	1.55964	1.55424	1.52026		2.02965	2.02796	2.0058	1.97295	2.00195	1.97797	1.97589	1.96109	1.98647	2.01653	2.02364	2.06662	2.05018	2.05034	2.04609
	Libyan Arab Jamahiriya	1.24848	1.26323	1.27561	1.28628	1.3066	1.31757	1.32432	1.31788	1.32932	1.31797	1.32562	1.33357	1.33401	1.35022	1.35103	1.29443	1.28801	1.28819	1.28696	1.28626	1.27089	1.26642	1.26096	1.23709	1.24664	1.21375	1.16766	1.13409	1.15241	1.18126	1.16038	1.11405		0.0683255	0.0680643	0.0674118	0.0668716	0.0674227	0.0664732	0.0665149	0.0663076	0.066947	0.0678901	0.0682006	0.0692593	0.0690336	0.0689655	0.0693146
	Cape Verde	1.54786	1.56575	1.58054	1.5889	1.6184	1.63225	1.64128	1.63056	1.64639	1.63097	1.63916	1.65212	1.65093	1.67138	1.66808	1.6785	1.6745	1.66604	1.65686	1.65953	1.63674	1.63128	1.61481	1.58253	1.58631	1.57176	1.55123	1.52004	1.53227	1.55964	1.55424	1.52026		2.02965	2.02796	2.0058	1.97295	2.00195	1.97797	1.97589	1.96109	1.98647	2.01653	2.02364	2.06662	2.05018	2.05034	2.04609
	Burkina Faso	1.54786	1.56575	1.58054	1.5889	1.6184	1.63225	1.64128	1.63056	1.64639	1.63097	1.63916	1.55573	1.47856	1.32238	1.08904	0.997464	0.943758	0.99285	1.27344	1.07864	1.16547	1.37849	1.3479	1.25404	1.25159	1.2795	1.33587	1.23416	1.19169	1.255	1.2782	1.27641		2.02965	2.02796	2.0058	1.97295	2.00195	1.97797	1.97589	1.96109	1.98647	2.01653	2.02364	1.94687	1.83761	1.62515	1.34076
	Angola	0.5207	0.526855	0.510335	0.537298	0.545785	0.55037	0.523202	0.52797	0.532552	0.528005	0.522458	0.525591	0.477738	0.465878	0.466158	0.465577	0.464437	0.479667	0.42808	0.43871	0.484387	0.495867	0.45629	0.479388	0.278613	0.261946	0.247688	0.277049	0.2532	0.438499	0.414235	0.386453		0.0459985	0.0458226	0.0447411	0.045044	0.0454152	0.0447756	0.0439594	0.0440286	0.0444532	0.0450794	0.0450372	0.0457363	0.0441941	0.0436447	0.0438657
	Somalia	1.54786	1.56575	1.58054	1.5889	1.6184	1.63225	1.64128	1.63056	1.64639	1.63097	1.63916	1.65212	1.65093	1.67138	1.66808	1.6785	1.6745	1.66604	1.65686	1.65953	1.63674	1.63128	1.61481	1.5244	1.52805	1.51609	1.49629	1.46979	1.48162	1.55964	1.55424	1.52026		2.02965	2.02796	2.0058	1.97295	2.00195	1.97797	1.97589	1.96109	1.98647	2.01653	2.02364	2.06662	2.05018	2.05034	2.04609
	Namibia	NA	NA	NA	NA	NA	NA	NA	NA	NA	NA	NA	NA	NA	NA	NA	0.0551778	0.0666588	0.0853098	0.044189	0.0501619	0.0495285	0.0134301	0.0133452	0.0235484	0.0131422	0.0411962	0.105967	0.124219	0.112239	0.288783	0.245731	0.141638		NA	NA	NA	NA	NA	NA	NA	NA	NA	NA	NA	NA	NA	NA	NA
	Mozambique	0.0281473	0.0786152	0.0861331	0.0607142	0.312485	0.820993	1.20355	1.31497	1.22554	1.16203	0.537779	0.449184	0.314943	0.166247	0.0835411	0.0822434	0.0716242	0.0405434	0.0310844	0.0171144	0.0148403	0.0178573	0.0163926	0.0165658	0.017438	0.014859	0.0137089	0.0133142	0.0134215	0.0135977	0.0136309	0.0133831		0.0425382	0.0833461	0.0827948	0.0667916	0.258956	0.723763	0.896463	0.99992	0.994141	0.909844	0.326858	0.37049	0.267452	0.109521	0.0331693
	Ghana	0.0196245	0.0220755	0.0230459	0.042282	0.0816498	0.0473149	0.0340177	0.0131884	0.0133085	0.0132297	0.0133154	0.0134016	0.0134326	0.0179421	0.0180875	0.0159766	0.0178039	0.0195559	0.0109265	0.011999	0.0123941	0.011392	0.00936044	0.0087593	0.0115687	0.0109332	0.00875723	0.00693216	0.00961392	0.234595	0.169785	0.0937514		0.0306264	0.0305763	0.0303055	0.0306177	0.0319894	0.0305485	0.0301865	0.0291976	0.0294916	0.029986	0.0301431	0.0306256	0.0305864	0.0308193	0.0309792
	Sierra Leone	1.54786	1.56575	1.58054	1.5889	1.6184	1.63225	1.64128	1.63056	1.64639	1.63097	1.63916	1.65212	1.65093	1.67138	1.66808	1.6785	1.6745	1.66604	1.65686	1.65953	1.43383	1.49646	1.50042	1.45174	1.42899	1.34909	1.55123	1.14319	1.02576	0.70039	0.453363	0.330141		2.02965	2.02796	2.0058	1.97295	2.00195	1.97797	1.97589	1.96109	1.98647	2.01653	2.02364	2.06662	2.05018	2.05034	2.04609
	Cameroon	0.0817675	0.0726406	0.0724654	0.0678412	0.0606805	0.0573532	0.0414076	0.0464977	0.0445304	0.04276	0.0430083	0.0428251	0.0478571	0.0484387	0.0479579	0.0521903	0.0506209	0.0266478	0.0306795	0.0257142	0.0250069	0.0360242	0.0574101	0.0624	0.067125	0.0811346	0.165848	0.293987	0.283848	0.327544	0.304847	0.277333		0.0325328	0.0321036	0.0317695	0.0313625	0.0313829	0.0308324	0.0303945	0.030449	0.0306757	0.0310677	0.0312098	0.0316814	0.0317238	0.0316925	0.0318382
	Tunisia	1.14838	1.15964	1.16124	1.18962	1.12648	1.09187	1.19632	1.11077	1.1704	1.17233	1.13891	1.2101	1.17075	1.195	1.13124	1.11047	1.10106	1.10211	1.0892	1.09427	1.07737	1.07055	1.0638	1.0288	1.03423	1.02904	1.03857	1.0268	1.02128	1.01358	1.00559	0.986597		0.123246	0.124617	0.126791	0.116179	0.158566	0.173757	0.128341	0.162543	0.149317	0.146473	0.169062	0.1258	0.154819	0.149149	0.18976
	United Republic of Tanzania	0.364254	0.372655	0.373453	0.377769	0.375534	0.361191	0.388942	0.360852	0.300722	0.220209	0.19882	0.19345	0.189991	0.198191	0.254741	0.340626	0.252382	0.292647	0.319496	0.195572	0.277467	0.1248	0.106276	0.0950081	0.222999	0.65817	0.755004	0.392169	0.395041	0.346665	0.402815	0.436179		0.0445343	0.0445219	0.0439872	0.0436791	0.0437362	0.0424887	0.0434461	0.0423675	0.0404964	0.038194	0.0375341	0.037873	0.0376191	0.0598138	0.0842162
	Zimbabwe	0.185035	0.154544	0.216795	0.267136	0.406485	0.650392	0.803346	1.13447	1.12902	1.03078	1.00191	1.02744	1.09746	1.30151	1.32465	1.30252	1.19373	1.19666	1.20257	0.979436	0.881535	1.02598	0.909195	0.626116	0.695363	0.69024	0.786481	0.722401	0.727108	0.791572	0.79298	0.778328		0.266038	0.22105	0.299086	0.359694	0.536792	0.832231	1.02042	1.4382	1.43283	1.33904	1.30038	1.34588	1.43156	1.6734	1.71053
	Gabon	0.630553	0.385721	0.328581	0.317878	0.298768	0.292809	0.294309	0.292878	0.295419	0.254593	0.344755	0.349937	0.365462	0.401547	0.354773	0.385257	0.428838	0.426587	0.45034	0.443278	0.456947	0.424672	0.429679	0.460302	0.485405	0.561548	0.491631	0.621679	0.574076	0.570978	0.612876	0.646815		0.0493686	0.0415599	0.0393568	0.0386494	0.0382699	0.0374914	0.037515	0.037398	0.0377586	0.0544494	0.0684492	0.0711339	0.073212	0.0762227	0.0805385
	Guinea-Bissau	1.54786	1.56575	1.58054	1.5889	1.6184	1.63225	1.64128	1.63056	1.64639	1.63097	1.63916	1.65212	1.65093	1.67138	1.66808	1.6785	1.6745	1.66604	1.65686	1.65953	1.63674	1.63128	1.61481	1.58253	1.58631	1.57176	1.55123	1.52004	1.53227	1.55964	1.55424	1.52026		2.02965	2.02796	2.0058	1.97295	2.00195	1.97797	1.97589	1.96109	1.98647	2.01653	2.02364	2.06662	2.05018	2.05034	2.04609
	Algeria	0.984205	0.984234	0.989264	1.02468	1.01236	1.01157	1.0525	1.02731	1.06	1.04392	1.05447	1.04812	1.05524	1.05724	1.07001	1.07314	1.07541	1.07542	1.06321	1.06704	1.05967	1.05551	1.04726	1.01865	1.0251	1.00909	1.00904	0.98931	0.9947	1.01041	1.01902	1.0053		0.200874	0.198291	0.194293	0.199749	0.198648	0.196407	0.203355	0.200153	0.208025	0.210892	0.216723	0.220044	0.220798	0.220686	0.222947
	Liberia	0.951832	0.956355	0.945547	0.950563	1.1066	1.07013	0.985898	0.987817	0.984945	0.988064	1.63916	1.65212	1.65093	1.67138	1.66808	1.6785	1.6745	1.66604	1.65686	1.65953	1.63674	1.63128	1.61481	1.58253	1.58631	1.57176	1.55123	1.52004	1.53227	1.55964	1.55424	1.52026		1.25347	1.24406	1.20548	1.18583	1.37322	1.30145	1.19232	1.19341	1.19389	1.2271	2.02364	2.06662	2.05018	2.05034	2.04609
	Eritrea	NA	NA	NA	NA	NA	NA	NA	NA	NA	NA	NA	NA	NA	NA	1.35103	1.35919	1.35608	1.35089	1.34521	1.351	1.33203	1.32766	1.31927	1.29211	1.2992	1.29039	1.27677	1.25173	1.26049	1.28399	1.28646	1.26282		NA	NA	NA	NA	NA	NA	NA	NA	NA	NA	NA	NA	NA	NA	0.0693146
	Djibouti	1.54786	1.56575	1.58054	1.5889	1.6184	1.63225	1.64128	1.63056	1.64639	1.63097	1.63916	1.65212	1.65093	1.67138	1.66808	1.6785	1.6745	1.66604	1.65686	1.65953	1.63674	1.63128	1.61481	1.58253	1.58631	1.57176	1.55123	1.52004	1.53227	1.55964	1.55424	1.52026		2.02965	2.02796	2.0058	1.97295	2.00195	1.97797	1.97589	1.96109	1.98647	2.01653	2.02364	2.06662	2.05018	2.05034	2.04609
	Uganda	0.0126291	0.0127784	0.0129036	0.0130115	0.013217	0.0133281	0.0133963	0.0133312	0.0134469	0.0133321	0.0134095	0.0134899	0.0134943	0.0136583	0.0136665	0.0137491	0.0286796	0.0268841	0.0266493	0.0136662	0.0134743	0.0134301	0.0133452	0.0130705	0.0131422	0.0625359	0.369479	0.411439	0.396116	0.423542	0.452556	0.467535		0.0304118	0.0302955	0.0300051	0.0297646	0.0300099	0.0295873	0.0296059	0.0295136	0.0297982	0.030218	0.0303562	0.0308274	0.0307269	0.0306966	0.030852
	Kenya	0.159626	0.0801567	0.0567184	0.14381	0.156209	0.113194	-0.0202561	0.00969461	-0.0224674	-0.0629789	-0.0201822	-0.0473099	-0.0586835	-0.0592508	-0.0313441	0.0416753	0.0372616	0.131506	0.151379	0.346242	0.585666	0.342687	0.173927	0.116451	0.233046	0.257664	0.279335	0.262302	0.368208	0.475803	0.313346	0.174183		-0.113407	-0.0897936	-0.0856367	-0.0444404	-0.0531585	-0.0427185	-0.048706	-0.0483036	-0.0442766	-0.0500069	-0.0487941	-0.0498381	-0.0582402	-0.0535072	-0.0508312
	Côte d'Ivoire	0.274338	0.106899	0.131903	0.604631	1.00425	0.425896	0.557431	0.649023	0.606181	0.64961	0.553733	0.429207	0.509688	0.666103	0.701933	0.543469	0.499653	0.583455	0.722246	0.687223	0.659903	0.65642	0.695885	0.647209	0.688656	0.751017	0.729153	0.661878	0.657692	0.586929	0.685493	0.7614		0.0384405	0.0331383	0.0335303	0.0470063	0.0586769	0.0412553	0.0449231	0.0474429	0.0465319	0.0485908	0.0459391	0.0429303	0.045121	0.0493776	0.0506466
	Equatorial Guinea	1.54786	1.56575	1.58054	1.5889	1.6184	1.63225	1.64128	1.63056	1.64639	1.63097	1.63916	1.65212	1.65093	1.67138	1.66808	1.6785	1.6745	1.66604	1.65686	1.65953	1.63674	1.63128	1.61481	1.58253	1.58631	1.57176	1.55123	1.52004	1.53227	1.55964	1.55424	1.52026		2.02965	2.02796	2.0058	1.97295	2.00195	1.97797	1.97589	1.96109	1.98647	2.01653	2.02364	2.06662	2.05018	2.05034	2.04609
	Seychelles	1.54786	1.56575	1.58054	1.5889	1.6184	1.63225	1.64128	1.63056	1.64639	1.63097	1.63916	1.65212	1.65093	1.67138	1.66808	1.6785	1.6745	1.66604	1.65686	1.65953	1.63674	1.63128	1.61481	1.58253	1.58631	1.57176	1.55123	1.52004	1.53227	1.55964	1.55424	1.52026		2.02965	2.02796	2.0058	1.97295	2.00195	1.97797	1.97589	1.96109	1.98647	2.01653	2.02364	2.06662	2.05018	2.05034	2.04609
	Malawi	0.0519941	0.0924179	0.0875529	0.0480312	0.0473698	0.0470557	0.0453156	0.0422103	0.042095	0.0417117	0.0366345	0.0353383	0.0347597	0.327752	0.31447	0.310437	0.293256	0.286387	0.266416	0.285591	0.256964	0.25213	0.251063	0.218308	0.220713	0.219504	0.224057	0.199969	0.22854	0.209389	0.200777	0.189261		0.0816742	0.13274	0.124091	0.0729464	0.0719662	0.0701787	0.0677683	0.0640061	0.0641257	0.0650655	0.0588316	0.0579713	0.0569536	0.413366	0.397259
	Togo	0.321591	0.325392	0.373678	0.967963	0.659907	0.404602	0.304714	0.404696	0.491945	0.339491	0.482057	0.404626	0.5417	0.358577	0.536983	0.339917	0.44519	0.682277	0.536737	0.360382	0.590343	0.849756	0.573027	0.38926	0.693997	0.764429	0.708037	0.595752	0.324685	0.24408	0.244549	0.240055		0.0398902	0.0397377	0.0406927	0.0575949	0.0487163	0.0406531	0.0378079	0.0405518	0.0433068	0.039636	0.043872	0.0422146	0.0460496	0.0405724	0.0459026
	Rwanda	0.0126291	0.0127784	0.0129036	0.0130115	0.013217	0.0133281	0.0133963	0.0133312	0.0134469	0.0133321	0.0134095	0.0134899	0.0134943	0.0136583	0.0136665	0.0137491	0.0137176	0.0136651	0.0136076	0.0136662	0.0134743	0.0134301	0.0133452	0.0130705	0.0131422	0.705812	1.16665	1.21856	0.941346	0.95443	0.948756	0.926405		0.0304118	0.0302955	0.0300051	0.0297646	0.0300099	0.0295873	0.0296059	0.0295136	0.0297982	0.030218	0.0303562	0.0308274	0.0307269	0.0306966	0.030852
	Lesotho	NA	NA	NA	NA	NA	NA	NA	NA	NA	NA	NA	NA	NA	NA	NA	NA	NA	NA	NA	0.0136662	0.0134743	0.0134301	0.0133452	0.0130705	0.0131422	0.0130531	0.0129153	0.012662	0.0127506	0.0129884	0.0130133	0.0127742		NA	NA	NA	NA	NA	NA	NA	NA	NA	NA	NA	NA	NA	NA	NA
	Madagascar	1.02364	0.997588	0.759396	0.729323	0.764579	0.771123	0.740749	0.667106	0.646629	0.684805	0.681127	0.686498	0.674212	0.682562	0.681238	0.679649	0.61764	0.588404	0.561359	0.569412	0.512941	0.66429	0.627863	0.621637	0.677049	0.673046	0.693587	0.613058	0.686731	0.641709	0.649882	0.646174		1.34698	1.29711	0.970861	0.913029	0.953047	0.941598	0.899221	0.810365	0.788506	0.854723	0.849026	0.866957	0.845594	0.84564	0.844019
	Central African Republic	0.0126291	0.0127784	0.0129036	0.0130115	0.013217	0.244603	0.216882	0.215485	0.217565	0.215537	0.216628	0.218318	0.218173	0.220873	0.381315	0.346699	0.345875	0.34414	0.342258	0.342839	0.338127	0.337001	0.333639	0.326963	0.327776	0.296454	0.269302	0.228002	0.215353	0.219209	0.21851	0.213773		0.0304118	0.0302955	0.0300051	0.0297646	0.0300099	0.307928	0.272891	0.270961	0.274382	0.278507	0.279516	0.285302	0.283159	0.283152	0.478683
	Benin	NA	NA	NA	NA	NA	NA	NA	NA	NA	NA	1.32562	1.33357	1.33401	1.35022	1.35103	1.35919	1.35608	1.35089	1.34521	1.351	1.33203	1.32766	1.31927	1.29211	1.2992	1.29039	1.27677	1.25173	1.26049	1.28399	1.28646	1.26282		NA	NA	NA	NA	NA	NA	NA	NA	NA	NA	0.0682006	0.0692593	0.0690336	0.0689655	0.0693146
	South Africa	1.5201	1.5307	1.55563	1.57465	1.55184	1.5499	1.50814	1.53391	1.4867	1.47706	1.53346	1.52738	1.53782	1.58705	1.55883	1.56145	1.55217	1.53617	1.5215	1.54109	1.51505	1.52311	1.50546	1.48877	1.48899	1.49093	1.48221	1.45796	1.46673	1.47863	1.48232	1.4559		2.37625	2.35613	2.34863	2.33834	2.2896	2.23663	2.16853	2.20785	2.14403	2.1796	2.25845	2.27112	2.27853	2.3197	2.28587
	Nigeria	0.646409	0.753867	0.767032	0.831019	0.77315	0.784817	0.785899	0.785448	0.735414	0.74638	0.711137	0.63782	0.656414	0.687202	0.708831	0.709489	0.725676	0.717408	0.680444	0.678099	0.639083	0.660397	0.695386	0.652496	0.70921	0.703655	0.751698	0.737158	0.742729	0.810637	0.792552	0.778063		0.121559	0.143184	0.137236	0.158248	0.142236	0.136216	0.126195	0.13367	0.126555	0.135017	0.137219	0.127858	0.125188	0.129534	0.139358
	Guinea	0.93377	0.961815	0.970902	0.966837	1.08334	1.06915	1.08711	1.08002	1.10208	1.06975	1.07512	1.08361	1.08284	1.0746	1.07249	1.07022	1.06768	0.907573	0.87436	0.76802	0.747279	0.681674	0.657235	0.862426	0.672858	0.711784	0.717206	0.660996	0.709197	0.729333	0.735462	0.727667		1.22995	1.25109	1.23744	1.2059	1.34464	1.30027	1.31332	1.30353	1.33424	1.3274	1.33209	1.36033	1.34955	1.32327	1.32061
	Mauritius	1.26224	1.38087	1.24462	1.47895	1.39951	1.22752	1.30906	1.24831	1.40145	1.27711	1.45597	1.50506	1.44389	1.49313	1.54745	1.47239	1.53494	1.55252	1.54275	1.02423	0.820169	0.826197	0.845817	0.84735	0.844916	0.891008	0.931175	0.909789	0.90553	0.795788	0.747184	0.71911		1.6577	1.79014	1.58242	1.83738	1.73305	1.49088	1.57869	1.50454	1.69297	1.58202	1.79904	1.88392	1.79485	1.83317	1.89915
	Botswana	1.50635	1.52416	1.55197	1.57843	1.61331	1.64927	1.64494	1.64688	1.62622	1.62063	1.63413	1.6735	1.67708	1.69556	1.69817	1.71108	1.70587	1.69666	1.69309	1.69942	1.67395	1.67012	1.65657	1.61985	1.62024	1.62899	1.61154	1.57946	1.59354	1.62326	1.62637	1.59649		1.71146	1.70491	1.76781	1.83529	1.91017	2.01486	1.94139	1.99361	1.80787	1.88306	1.91621	2.12474	2.13609	2.12265	2.1429
	Morocco	0.939068	1.0934	1.21169	1.25978	1.29713	1.28055	1.30684	1.2983	1.28821	1.22055	1.23527	1.21648	1.25756	1.37968	1.33442	1.46965	1.31599	1.30905	1.37733	1.45998	1.49415	1.50549	1.49582	1.40985	1.41578	1.41872	1.3907	1.34859	1.33552	1.23495	1.16115	1.06453		0.459007	0.491695	0.439245	0.482358	0.441519	0.381167	0.6158	0.76047	0.660929	0.518239	0.543527	0.480457	0.427811	0.609105	0.608283
	Zambia	0.0376134	0.0314096	0.0283146	0.0300555	0.0308831	0.0279007	0.029755	0.030315	0.0310145	0.0289714	0.0232587	0.0254418	0.0235944	0.0239615	0.0213329	0.0228483	0.0219763	0.0231745	0.0252513	0.0211417	0.0208476	0.020663	0.0203452	0.019824	0.0196759	0.0208601	0.0195818	0.0152342	0.0153787	0.0167284	0.0164274	0.0158786		0.0528709	0.0436164	0.039946	0.0413501	0.0424119	0.0385614	0.0396347	0.0390017	0.0412874	0.0435001	0.0390812	0.0417554	0.0402324	0.040671	0.0353471
	Senegal	1.24848	1.26323	1.27561	1.28628	1.3066	1.31757	1.32432	1.31755	1.32079	1.30886	1.31885	1.32845	1.33124	1.33627	1.332	1.31233	1.31559	1.3302	1.32839	1.34618	1.33164	1.32766	1.17305	1.05597	1.10034	1.13313	1.14053	1.15964	1.1304	1.10494	1.10941	1.09112		0.0683255	0.0680643	0.0674118	0.0668716	0.0674227	0.0664732	0.0665149	0.0664954	0.0717272	0.0731123	0.0720787	0.0722236	0.0706301	0.0768988	0.0801812
	Mauritania	0.889412	0.800062	0.802309	0.818588	0.827332	0.877191	1.11863	0.98718	1.0171	0.999245	1.00898	1.02582	1.02361	1.03582	1.03358	1.06827	1.07499	1.01883	1.0769	1.02681	1.02785	1.03755	1.02943	0.991247	1.01068	1.00632	0.978712	0.967502	0.950785	0.931814	0.925195	0.908329		0.118908	0.110667	0.107254	0.101289	0.100416	0.0982274	0.129815	0.135161	0.135312	0.132638	0.144104	0.14491	0.142861	0.150273	0.154403
	Burundi	NA	NA	NA	0.0130115	0.013217	0.0133281	0.0133963	0.0133312	0.0134469	0.0133321	0.0134095	0.0134899	0.0134943	0.0136583	0.0136665	0.0137491	0.0137176	0.0136651	0.0136076	0.0136662	0.0134743	0.0134301	0.0133452	0.0130705	0.0131422	0.0130531	0.0129153	0.012662	0.0127506	0.0129884	0.0130133	0.0127742		NA	NA	NA	0.0297646	0.0300099	0.0295873	0.0296059	0.0295136	0.0297982	0.030218	0.0303562	0.0308274	0.0307269	0.0306966	0.030852
	Sudan	0.370846	0.292135	0.325456	0.328177	0.408416	0.375619	0.377543	0.375706	0.38645	0.380261	0.480773	0.49202	0.439736	0.464645	0.526323	0.637614	0.641052	0.679047	0.66957	0.667983	0.707451	0.723692	0.758957	0.83389	0.874412	0.856447	0.880901	0.881045	0.917597	0.512097	0.474321	0.432826		0.0414012	0.0387332	0.0392642	0.0389495	0.0414416	0.0398334	0.0398584	0.0397341	0.0403286	0.0408132	0.043835	0.044759	0.0430917	0.0436094	0.045596
Asia and Oceania	Afghanistan	0.372285	0.42042	0.397029	0.396832	0.41232	0.408633	0.598106	0.608875	0.500349	0.49026	0.49981	0.493167	0.495446	0.485835	0.492634	0.515498	0.537685	0.560212	0.55422	0.531363	0.515272	0.251113	0.304012	0.489454	0.551685	0.551745	0.558055	0.559048	0.4721	0.142879	0.132795	0.12246		0.449415	0.505448	0.465684	0.456711	0.476433	0.465294	0.673658	0.689424	0.569352	0.569791	0.573157	0.571078	0.56446	0.548669	0.557034
	Fiji	1.33962	1.35892	1.37902	1.21294	0.35652	0.35512	0.125041	0.0865773	0.125813	0.157463	0.14122	0.1708	0.14354	0.174573	0.220613	0.214444	0.214551	0.233108	0.240955	0.274706	0.263902	0.264161	0.307117	0.593808	0.581746	0.686806	0.728015	0.427169	0.457159	0.534921	0.678495	0.5664		0.841329	0.861667	0.910379	0.835558	0.278898	0.298742	0.118684	0.0902088	0.121483	0.150049	0.146665	0.177369	0.155558	0.185575	0.232153
	Philippines	0.866493	0.825341	0.809714	0.870672	0.733982	0.779657	0.755306	0.769973	0.755636	0.761086	0.766695	0.787831	0.820588	0.807661	0.835408	0.890938	0.911495	0.977053	0.986547	0.860971	0.906576	0.980905	0.928104	0.899459	0.910526	0.894185	0.840597	0.876438	0.843918	0.871653	0.988607	0.964636		0.110057	0.111777	0.151979	0.170231	0.223404	0.431701	0.402113	0.305556	0.319558	0.310134	0.264617	0.274451	0.261555	0.269384	0.20657
	Sri Lanka	0.141521	0.204105	0.291443	0.537298	0.106434	0.0455317	0.0133963	0.255464	0.104032	0.0364639	0.0134095	0.108918	0.138464	0.0716214	0.0974457	0.104966	0.378986	0.438902	0.413329	0.434225	0.684031	0.707891	0.806158	0.727843	0.819534	0.800787	0.697649	0.740804	0.685284	0.764715	0.602006	0.473591		0.0343659	0.0360743	0.0382566	0.045044	0.0327063	0.0304981	0.0296059	0.0363428	0.0323555	0.0308859	0.0303562	0.0336056	0.0343522	0.0323562	0.0332615
	Solomon Islands	1.33962	1.35892	1.37902	1.39755	1.42457	1.45645	1.47453	1.46997	1.48209	1.46901	1.48659	1.49873	1.50558	1.52729	1.52856	1.53893	1.53863	1.52967	1.52684	1.5359	1.52177	1.52162	1.51324	1.49034	1.50412	1.50363	1.49443	1.4679	1.47995	1.51022	1.51001	1.48396		0.841329	0.861667	0.910379	0.959526	1.05322	1.16602	1.22494	1.24674	1.24641	1.2583	1.33991	1.3798	1.40395	1.42769	1.45369
	China	1.43464	1.42049	1.41297	1.39438	1.45267	1.48894	1.53079	1.54217	1.55971	1.54264	1.55569	1.60591	1.62851	1.62937	1.6117	1.60335	1.62716	1.62771	1.61279	1.63009	1.6239	1.5813	1.5899	1.59193	1.57834	1.57282	1.573	1.57157	1.54105	1.5401	1.50883	1.50636		0.403799	0.398345	0.402269	0.400015	0.424298	0.447957	0.467638	0.476267	0.482338	0.492881	0.504188	0.528226	0.53692	0.526713	0.537176
	Indonesia	1.26975	1.26607	1.31967	1.30729	1.32776	1.3534	1.3871	1.42733	1.40764	1.36008	1.41427	1.42283	1.37781	1.37139	1.23359	1.16691	1.17894	1.27486	1.21714	1.26297	1.28927	1.28123	1.33901	1.34111	1.37351	1.37949	1.38966	1.35298	1.33767	1.32995	1.28056	1.317		0.0733018	0.0722851	0.0742926	0.0747981	0.0754787	0.245891	1.80215	2.00148	2.01435	2.2244	2.14119	2.15029	1.99776	1.70757	1.77416
	Samoa	1.33962	1.35892	1.03749	0.936036	0.954121	0.975409	0.743963	0.984421	0.992543	0.74117	0.750002	0.756111	0.908746	0.921835	0.922604	1.03053	0.885097	0.879956	0.95938	0.859349	0.956158	0.851311	0.695116	0.751706	0.758629	0.758343	0.753673	0.806428	0.813042	0.829658	0.829557	0.815237		0.841329	0.861667	0.690286	0.649605	0.712148	0.787209	0.627272	0.840995	0.840875	0.644258	0.685132	0.705312	0.85466	0.868895	0.884557
	Papua New Guinea	0.991006	1.01078	1.04582	1.01069	1.02419	1.05119	1.061	1.10152	1.09281	1.0814	1.09663	1.10558	1.11062	1.12662	1.12105	0.675997	0.699478	0.849414	0.905466	0.799072	0.860992	0.98172	1.01146	1.02639	1.06519	0.981018	0.974247	0.929266	0.929696	0.960521	0.960873	0.944715		0.628291	0.646657	0.695654	0.69974	0.762946	0.846884	0.886636	0.938851	0.923937	0.931294	0.993261	1.02272	1.04045	1.0579	1.07094
	Thailand	1.34785	1.17367	1.02461	1.07298	1.05408	1.08681	1.03614	1.06154	1.08144	1.06765	1.19376	1.2304	1.24996	1.2553	1.2463	1.21492	1.18419	1.18364	1.16259	1.13142	1.07055	1.03424	0.996316	0.959545	0.993122	0.980847	0.981368	0.956737	0.95554	0.989475	0.991849	0.988627		0.469887	0.506877	0.510911	0.45388	0.516921	0.986189	0.961321	0.999181	0.913386	0.928743	1.0933	1.14533	1.14238	0.953571	0.898681
	Mongolia	0	0	0	0	0	1.63536	1.64929	1.64303	1.65628	1.64446	1.64925	1.65908	1.66794	1.67727	1.68835	1.70311	1.69847	1.69199	1.68549	1.69503	1.67378	1.66729	1.6582	1.623	1.63114	1.62125	1.60359	1.56952	1.58068	1.61092	1.61279	1.58013		0	0	0	0	0	1.93317	1.96683	1.97106	1.98416	2.02599	2.00673	2.03752	2.081	2.01394	2.08426
	Burma	0.542482	0.44478	0.471546	0.473721	0.534531	0.604966	0.608171	0.636426	0.64994	0.588085	0.574544	0.606687	0.541409	0.545961	0.595642	0.652268	0.627759	0.672281	0.830593	0.867463	0.693422	0.683874	0.651326	0.658932	0.623677	0.56518	0.5356	0.502898	0.434094	0.289566	0.379783	0.445072		0.107601	0.104249	0.10778	0.109972	0.115927	0.134674	0.147618	0.136422	0.149882	0.150499	0.143067	0.151632	0.113246	0.116982	0.134179
	Australia	1.39574	1.39213	1.41787	1.46458	1.49255	1.50237	1.49771	1.51827	1.53784	1.52557	1.5586	1.57044	1.57914	1.58621	1.59737	1.60566	1.61737	1.60973	1.62362	1.61742	1.60196	1.60148	1.54362	1.51075	1.52279	1.524	1.50362	1.47796	1.48719	1.46987	1.43751	1.37164		4.26013	4.11774	4.0871	4.18484	4.22809	4.24784	4.21742	4.34932	4.42745	4.4907	4.60546	4.76959	4.80518	4.75505	4.8244
	Viet Nam	1.03242	1.03009	1.04269	1.03849	1.07083	1.09082	1.09222	1.09126	1.13142	0.783581	0.577005	0.470707	0.360726	0.36134	0.363752	0.40795	0.421484	0.551287	0.658067	0.55323	0.588614	0.52631	0.622212	0.663572	0.727691	0.717424	0.807966	0.792475	0.766273	0.7535	0.848539	0.857398		1.06272	0.999567	0.974633	0.889003	0.986097	0.986486	0.986523	1.00122	1.0784	0.770242	0.513449	0.35343	0.215876	0.163025	0.219637
	Pakistan	0.411833	0.43363	0.553386	0.534916	0.5339	0.607291	0.592666	0.591794	0.638238	0.65346	0.617159	0.628767	0.641865	0.688067	0.681151	0.681369	0.747779	0.771719	0.767022	0.859896	0.881409	0.839257	0.792464	0.694271	0.729776	0.70567	0.724841	0.743827	0.761373	0.78241	0.731582	0.699994		0.112378	0.111418	0.11555	0.102743	0.102999	0.110461	0.108078	0.1055	0.107908	0.108966	0.105294	0.103917	0.100544	0.100934	0.0973393
	Hong Kong Special Administrative Region (China)	1.24848	1.26323	1.34987	1.46867	1.54613	1.58881	1.62125	1.64905	1.67436	1.65597	1.66961	1.67341	1.67167	1.68909	1.70087	1.70805	1.60402	1.45247	1.48104	1.42996	1.43591	1.43708	1.44276	1.49843	1.45305	1.45095	1.42679	1.42457	1.40417	1.44641	1.39646	1.42498		0.0683255	0.0680643	0.524322	1.17088	1.50655	1.6597	1.80286	2.00628	2.09015	2.095	2.12868	2.12418	2.10346	2.0842	2.15904
	Japan	0.760501	0.769431	0.726517	0.73285	0.750046	0.718903	0.707786	0.69868	0.716772	0.726054	0.775204	0.770229	0.784782	0.754989	0.798563	0.771938	0.770431	0.747529	0.732056	0.766848	0.751413	0.754925	0.790144	0.816269	0.789428	0.781648	0.758786	0.806073	0.795291	0.771026	0.782325	0.881094		0.230288	0.24308	0.226832	0.24182	0.273689	0.282614	0.277274	0.279285	0.276852	0.280475	0.344999	0.355222	0.364848	0.37	0.391885
	India	1.3435	1.39821	1.49567	1.49047	1.55237	1.66429	1.69894	1.82334	1.7887	1.7966	1.74187	1.79404	1.83193	1.89276	1.84786	1.9347	1.9508	1.90432	1.85841	1.88191	1.90515	1.90137	1.92902	1.8535	1.85094	1.79875	1.77196	1.72745	1.79529	1.83298	1.81903	1.75925		1.24989	1.3008	1.36152	1.33515	1.38399	1.46284	1.49276	1.60983	1.58998	1.62819	1.57141	1.63463	1.65909	1.69916	1.65867
	Malaysia	1.62986	1.63568	1.70702	1.68118	1.50722	1.40649	1.36119	1.27697	1.25333	1.34205	1.48123	1.37984	1.31838	1.26635	1.1776	1.18204	1.20519	1.22932	1.12295	1.02906	0.986565	1.04987	1.12055	1.05201	1.11844	1.14585	1.13547	1.14251	1.1312	1.15439	1.22674	1.31078		0.0928891	0.0919823	0.0933798	0.0911604	0.083835	0.0813714	0.0803087	0.0776583	0.108873	0.328894	0.403994	0.415959	0.381748	0.332967	0.297319
	French Polynesia	1.33962	1.35892	1.37902	1.33162	1.26776	1.23998	1.25536	1.25147	1.16282	1.11965	1.14663	1.12742	1.05795	1.0732	1.08875	0.984317	0.937908	0.950024	0.839009	1.17772	1.08516	1.19375	1.13827	1.09464	1.08167	1.07414	1.03297	0.975357	1.01215	1.07624	1.13017	1.16709		0.841329	0.861667	0.910379	0.915251	0.939528	0.995555	1.04564	1.06415	0.981932	0.963558	1.0377	1.04255	0.991983	1.00859	1.04061
	Vanuatu	1.33962	1.35892	1.37902	1.39755	1.42457	1.45645	1.47453	1.46997	1.48209	1.46901	1.48659	1.49873	1.50558	1.52729	1.52856	1.53893	1.53863	1.52967	1.52684	1.5359	1.52177	1.52162	1.51324	1.49034	1.50412	1.50363	1.49443	1.4679	1.47995	1.51022	1.51001	1.48396		0.841329	0.861667	0.910379	0.959526	1.05322	1.16602	1.22494	1.24674	1.24641	1.2583	1.33991	1.3798	1.40395	1.42769	1.45369
	Republic of Korea (South)	0.794489	0.81135	0.872636	0.872199	0.983206	0.973093	0.996923	0.973539	0.948902	0.928264	0.92173	0.91777	0.768244	0.800572	0.772009	0.763504	0.828164	0.873609	0.881466	0.737934	0.759753	0.765721	0.742818	0.692789	0.679069	0.66142	0.664334	0.577208	0.596126	0.941404	0.945662	0.922575		1.48256	1.49947	1.55253	1.54857	1.55274	1.62384	1.54606	1.52701	1.49882	1.58715	1.51575	1.69573	1.41669	1.47244	1.42635
	Macao Special Administrative Region (China)	1.48253	1.50746	1.51739	1.53294	1.56358	1.57934	1.58654	1.57987	1.59219	1.57419	1.57275	1.58044	1.5741	1.59545	1.59426	1.59822	1.58562	1.58901	1.56787	1.56676	1.55232	1.54517	1.53375	1.48986	1.49414	1.48653	1.477	1.44508	1.45642	1.47425	1.48034	1.46611		1.74286	1.77252	1.73641	1.72047	1.76419	1.75565	1.76241	1.76537	1.77926	1.79609	1.77051	1.79565	1.75901	1.7659	1.76725
	Tonga	NA	1.35892	1.37902	1.39755	1.42457	1.45645	1.47453	1.46997	1.48209	1.46901	1.48659	1.49873	1.50558	1.52729	1.52856	1.53893	1.53863	1.52967	1.52684	1.5359	1.52177	1.52162	1.51324	1.49034	1.50412	1.50363	1.49443	1.4679	1.47995	1.51022	1.51001	1.48396		NA	0.861667	0.910379	0.959526	1.05322	1.16602	1.22494	1.24674	1.24641	1.2583	1.33991	1.3798	1.40395	1.42769	1.45369
	Kiribati	NA	NA	NA	NA	NA	NA	NA	NA	NA	NA	NA	NA	NA	NA	NA	NA	NA	1.52967	1.52684	1.5359	1.52177	1.52162	1.51324	1.49034	1.50412	1.50363	1.49443	1.4679	1.47995	1.51022	1.51001	1.48396		NA	NA	NA	NA	NA	NA	NA	NA	NA	NA	NA	NA	NA	NA	NA
	Brunei Darussalam	0.990344	1.0012	1.01064	1.01877	1.03472	1.04338	1.04977	1.04404	1.053	1.04493	1.05091	1.05723	1.05732	1.07031	1.07078	1.07702	1.07453	1.07052	1.06627	1.07093	1.05589	1.0525	1.04583	1.02392	1.02983	1.02284	1.01218	0.992414	0.999337	1.01814	1.02003	1.00127		0.22559	0.225235	0.223296	0.221692	0.223603	0.220471	0.220023	0.219691	0.221861	0.22446	0.225539	0.229029	0.228431	0.228123	0.229379
	Cook Islands	1.33962	1.35892	1.37902	1.39755	1.42457	1.45645	1.47453	1.46997	1.48209	1.46901	1.48659	1.49873	1.50558	1.52729	1.52856	1.53893	1.53863	1.52967	1.52684	1.5359	1.52177	1.52162	1.51324	1.49034	1.50412	1.50363	1.49443	1.4679	1.47995	0	0	0		0.841329	0.861667	0.910379	0.959526	1.05322	1.16602	1.22494	1.24674	1.24641	1.2583	1.33991	1.3798	1.40395	1.42769	1.45369
	Singapore	1.24848	1.26323	1.27561	1.28628	1.3066	1.31757	1.32432	1.31788	1.32932	1.31797	1.32562	1.33357	1.30096	1.25742	1.26305	1.27455	1.27916	1.28224	1.26558	1.28867	1.27317	1.24183	1.18971	1.11967	1.10533	1.07741	1.05949	1.03975	1.0412	0.976236	0.9858	0.960293		0.0683255	0.0680643	0.0674118	0.0668716	0.0674227	0.0664732	0.0665149	0.0663076	0.066947	0.0678901	0.0682006	0.0692593	0.0880723	0.121734	0.119563
	Nauru	1.33962	1.35892	1.37902	1.39755	1.42457	1.45645	1.47453	1.46997	1.48209	1.46901	1.48659	1.49873	1.50558	1.52729	1.52856	1.53893	1.53863	1.52967	1.52684	1.5359	1.52177	1.52162	1.51324	1.49034	1.50412	1.50363	1.49443	1.4679	1.47995	1.51022	1.51001	1.48396		0.841329	0.861667	0.910379	0.959526	1.05322	1.16602	1.22494	1.24674	1.24641	1.2583	1.33991	1.3798	1.40395	1.42769	1.45369
	Guam	1.33962	1.35892	1.37902	1.39755	1.42457	1.45645	1.47453	1.46997	1.48209	1.46901	1.48659	1.49873	1.50558	1.52729	1.52856	1.53893	1.53863	1.52967	1.52684	1.5359	1.52177	1.52162	1.51324	1.49034	1.50412	1.50363	1.49443	1.4679	1.47995	1.51022	1.51001	1.48396		0.841329	0.861667	0.910379	0.959526	1.05322	1.16602	1.22494	1.24674	1.24641	1.2583	1.33991	1.3798	1.40395	1.42769	1.45369
	Cambodia	0.00631456	0.00638919	0.00645181	0.0052046	0.00440568	0.00399842	0.0048714	0.00444373	0.00517187	0.00512772	0.0053638	0.00539597	0.00539773	0.00512186	0.00562738	1.02283	1.02049	1.13521	1.15498	1.21384	1.21737	1.25327	1.26904	1.2054	1.26297	1.22808	1.21482	1.20256	1.22379	1.22985	1.19634	1.10966		0.0152059	0.0151477	0.0150025	0.0119059	0.0100033	0.00887619	0.0107658	0.00983786	0.0114608	0.0116223	0.0121425	0.012331	0.0122908	0.0115112	0.0127038
	New Zealand	0.0922205	0.0948589	0.209751	0.182497	0.216126	0.240472	0.179017	0.187613	0.170653	0.21571	0.20431	0.234099	0.291738	0.246957	0.206053	0.178584	0.247066	0.314418	0.302136	0.295738	0.297602	0.397023	0.331338	0.387439	0.337641	0.424998	0.411057	0.361188	0.400787	0.310023	0.278917	0.251552		0.0747335	0.0601928	0.094167	0.0965421	0.124168	0.11237	0.0800915	0.0875884	0.0805627	0.0913951	0.100474	0.0966327	0.148495	0.112542	0.103268
	Lao People's Democratic Republic	0.0738749	0.0789149	0.0766532	0.0709136	0.0611663	0.0667149	0.0695802	0.0972529	0.106314	0.0811953	0.0867903	0.0823667	0.0836339	0.0839601	0.0675504	0.0581734	0.0523709	0.0661765	0.140486	0.159268	0.158407	0.156898	0.155078	0.150336	0.148187	0.141929	0.140765	0.123764	0.129411	0.162258	0.175149	0.186184		0.101764	0.107385	0.10231	0.0941726	0.0836445	0.0884305	0.0914918	0.122506	0.132708	0.106995	0.112246	0.108402	0.108402	0.107817	0.0900475
	Maldives	NA	NA	NA	NA	NA	1.45645	1.47453	1.46997	1.48209	1.46901	1.48659	1.49873	1.50558	1.52729	1.52856	1.53893	1.53863	1.52967	1.52684	1.5359	1.52177	1.52162	1.51324	1.49034	1.50412	1.50363	1.49443	1.4679	1.47995	1.51022	1.51001	1.48396		NA	NA	NA	NA	NA	1.16602	1.22494	1.24674	1.24641	1.2583	1.33991	1.3798	1.40395	1.42769	1.45369
	Nepal	0.198006	0.175881	0.177605	0.0901793	0.0871244	0.0878564	0.0716598	0.0599223	0.0596178	0.0607734	0.0428974	0.0421874	0.0595588	0.073061	0.0826028	0.0915847	0.0475586	0.0508102	0.122755	0.111737	0.0608476	0.0276379	0.0195639	0.0130705	0.0185458	0.0130531	0.0129153	0.012662	0.0172389	0.017115	0.0130133	0.0127742		0.0360988	0.0352218	0.0348842	0.0320135	0.0321478	0.0316951	0.0312463	0.0308276	0.0311016	0.0315879	0.0312066	0.0316629	0.0320632	0.0323974	0.0328346
	New Caledonia	1.06612	1.0572	0.778529	0.855773	0.791896	0.816575	0.931823	1.08256	0.800221	0.817784	0.878399	1.04379	1.04855	1.06365	1.06533	1.13092	1.12473	1.1612	1.14349	1.07823	1.10334	1.18852	1.22972	1.20557	1.19477	1.21073	1.23523	1.13242	1.08457	1.15867	1.15311	1.12859		0.674193	0.675325	0.523402	0.595706	0.594538	0.66213	0.780957	0.923007	0.681556	0.708893	0.799267	0.966599	0.983323	0.999785	1.01861
	Bangladesh	0.830961	0.903692	0.881883	0.881572	0.861932	0.932937	1.02729	0.989701	0.979207	0.931652	0.941936	0.957029	0.977244	1.01896	0.999789	1.03731	1.01922	1.02787	1.01468	1.03099	1.0064	1.0066	1.00035	0.979716	0.990541	0.985659	0.982413	0.962797	0.9769	1.00074	1.00196	0.982608		0.138361	0.148074	0.148907	0.158002	0.152626	0.160664	0.161014	0.179978	0.184311	0.1877	0.197705	0.208033	0.205387	0.205823	0.203266
	American Samoa	1.33962	1.35892	1.37902	1.39755	1.42457	1.45645	1.47453	1.46997	1.48209	1.46901	1.48659	1.49873	1.50558	1.52729	1.52856	1.53893	1.53863	1.52967	1.52684	1.5359	1.52177	1.52162	1.51324	1.49034	1.50412	1.50363	1.49443	1.4679	1.47995	1.51022	1.51001	1.48396		0.841329	0.861667	0.910379	0.959526	1.05322	1.16602	1.22494	1.24674	1.24641	1.2583	1.33991	1.3798	1.40395	1.42769	1.45369
	Bhutan	1.48253	1.50746	1.51739	1.53294	1.56358	0.0133281	0.0133963	0.0133312	0.0134469	0.0133321	0.0134095	0.0134899	0.0134943	0.0136583	0.0136665	0.0137491	0.0137176	0.0136651	0.0136076	0.0136662	0.0134743	0.0134301	0.0133452	0.0130705	0.0131422	0.0130531	0.0129153	0.012662	0.0127506	0.0129884	0.0130133	0.0127742		1.74286	1.77252	1.73641	1.72047	1.76419	0.0295873	0.0296059	0.0295136	0.0297982	0.030218	0.0303562	0.0308274	0.0307269	0.0306966	0.030852
Central and South America	Uruguay	0.396693	0.365471	0.400038	0.0375988	0.0349241	0.0413333	0.0348576	0.0639764	0.298167	0.417093	0.0850173	0.16766	0.146757	0.117784	0.0385312	0.0966127	0.180483	0.131432	0.127822	0.310213	0.0966584	0.0163121	0.0174822	0.0191037	0.239347	0.166029	0.444964	0.168679	0.535664	0.204567	-0.0273119	-0.102641		0.0421942	0.0409482	0.0414736	0.0304812	0.0306378	0.0303793	0.0302101	0.030942	0.0378362	0.0418768	0.0324213	0.0353158	0.0345927	0.033678	0.0315671
	Falkland Islands (Malvinas)	NA	NA	NA	NA	NA	NA	NA	NA	1.28561	1.27849	1.28107	1.28167	1.28209	1.29742	1.30773	1.31035	1.30745	1.30467	1.29405	1.29745	1.26658	1.25066	1.23277	1.19737	1.19517	1.19649	1.17849	1.15719	1.15316	1.17665	1.17152	1.15321		NA	NA	NA	NA	NA	NA	NA	NA	0.334822	0.355781	0.376614	0.380785	0.363104	0.388589	0.40394
	Peru	0.377963	0.32143	0.312515	0.296173	0.329676	0.273647	0.275819	0.287413	0.29782	0.305469	0.284397	0.240309	0.333446	0.271686	0.175476	0.316962	0.30862	0.354027	0.336293	0.304072	0.236283	0.182008	0.219766	0.227228	0.345089	0.300625	0.269077	0.301181	0.381185	0.365091	0.358487	0.361375		0.0251228	0.0261289	0.0123224	0.0109535	0.0147059	0.00948808	0.0126933	0.0184886	0.0182057	0.0187097	0.0228818	0.0225514	0.0241554	0.0264302	0.0219356
	Martinique	1.19876	1.2183	1.22545	1.23544	1.25713	1.27035	1.28491	1.28127	1.28561	1.27849	1.28107	1.28167	1.28209	1.29742	1.30773	1.31035	1.30745	1.30467	1.29405	1.29745	1.26658	1.25066	1.23277	1.19737	1.19517	1.19649	1.17849	1.15719	1.15316	1.17665	1.17152	1.15321		0.22632	0.242478	0.243762	0.244126	0.285491	0.305857	0.321747	0.319657	0.334822	0.355781	0.376614	0.380785	0.363104	0.388589	0.40394
	Ecuador	0.909301	0.986929	0.987457	0.756526	0.312173	0.274177	0.245777	0.204665	0.195276	0.18976	0.282202	0.359041	0.404548	0.288724	0.264736	0.51932	0.428683	0.429944	0.477243	0.405276	0.372733	0.471084	0.468522	0.460028	0.505999	0.519909	0.451769	0.380937	0.386315	0.505512	0.527129	0.490889		0.0579201	0.0597187	0.0588754	0.0514329	0.0386576	0.0369645	0.0361485	0.03491	0.0349315	0.0353124	0.0381082	0.0408875	0.042071	0.0385724	0.0380728
	Trinidad and Tobago	0.962268	0.987922	0.998969	1.00739	1.02476	1.0317	1.02921	1.02359	1.03209	1.02299	1.02951	1.03644	1.0379	1.04984	1.04288	1.05058	1.06473	1.06134	1.05778	1.06226	1.04727	1.03799	1.03146	1.01692	1.01745	1.01154	1.00078	0.986309	0.993313	1.01197	1.01035	0.988906		0.2027	0.215309	0.214974	0.214422	0.215749	0.213742	0.20739	0.208392	0.210545	0.213319	0.214676	0.218512	0.218542	0.217886	0.214401
	El Salvador	0.103557	0.11463	0.0922636	0.121989	0.0837122	0.125712	0.0887267	0.260311	0.186305	0.129749	0.107192	0.470803	0.42837	0.498068	0.616433	0.590264	0.433334	0.626614	0.622164	0.498118	0.648446	0.611915	0.634481	0.542396	0.573333	0.520008	0.515424	0.522968	0.457612	0.515964	0.398637	0.283663		0.115701	0.142219	0.148428	0.122349	0.114193	0.072921	0.0649471	0.0842259	0.0716424	0.0715308	0.0696587	0.0945465	0.0754317	0.0794719	0.086582
	Costa Rica	0.0263195	0.0415419	0.0458146	0.0411276	0.0276051	0.029033	0.0329685	0.0363306	0.0404416	0.021239	0.0441045	0.0736371	0.19107	0.154349	0.22536	0.235882	0.140432	0.0587645	0.112404	0.0508809	0.0315994	0.0392763	0.0306071	-0.0333787	-0.0191825	0.0537564	0.081221	0.101159	0.0914325	0.0545534	0.0733152	0.0893017		0.0224216	0.0235054	0.0237366	0.0244964	0.0245729	0.0237849	0.0241847	0.0244437	0.0248983	0.0304463	0.0312414	0.0278125	0.0358782	0.0347249	0.0554398
	Bolivia	0.273089	0.308022	0.277576	0.268489	0.195803	0.210022	0.230557	0.215852	0.304314	0.351139	0.418016	0.389397	0.410291	0.413722	0.504007	0.565807	0.539334	0.528504	0.578651	0.531046	0.485724	0.443117	0.451535	0.512669	0.500541	0.574122	0.559819	0.554679	0.565692	0.59995	0.621554	0.625421		0.0216205	0.0462601	0.0454296	0.0244078	0.0202444	0.0238547	0.0276884	0.0196533	0.0432726	0.0551789	0.0714985	0.0716099	0.0709533	0.0773084	0.0978922
	Cuba	0.949862	0.980901	0.977017	0.995202	1.02661	1.03506	1.03573	1.04034	1.04216	1.04443	1.04634	0.983615	0.95147	1.07453	1.082	1.15314	1.09927	1.12007	1.13844	1.10305	1.07168	1.07607	1.0565	1.06011	1.04645	1.12373	1.12554	1.1025	1.0857	1.09888	1.1204	1.12655		-0.0973311	-0.0885936	-0.0966095	-0.0890053	-0.0807556	-0.0808603	-0.0831693	-0.0790428	-0.0824687	-0.077356	-0.0786765	-0.117325	-0.135947	-0.0747403	-0.0730348
	Colombia	0.289402	0.295599	0.323363	0.349553	0.344517	0.332126	0.281067	0.369441	0.30106	0.266505	0.300727	0.324138	0.414857	0.335785	0.27192	0.320531	0.216855	0.34299	0.347756	0.24852	0.278617	0.27559	0.255305	0.241666	0.203726	0.210827	0.204374	0.1926	0.16223	0.299032	0.306536	0.26931		0.194677	0.19244	0.208167	0.195682	0.233489	0.253882	0.214342	0.276718	0.231424	0.227435	0.252685	0.270408	0.349041	0.273603	0.218805
	Montserrat	1.19876	1.2183	1.22545	1.23544	1.25713	1.27035	1.28491	1.28127	1.28561	1.27849	1.28107	1.28167	1.28209	1.29742	1.30773	1.31035	1.30745	1.30467	1.29405	1.29745	1.26658	1.25066	1.23277	1.19737	1.19517	1.19649	1.17849	1.15719	1.15316	1.17665	1.17152	1.15321		0.22632	0.242478	0.243762	0.244126	0.285491	0.305857	0.321747	0.319657	0.334822	0.355781	0.376614	0.380785	0.363104	0.388589	0.40394
	Jamaica	1.07356	1.10016	1.09078	1.11396	1.16377	1.17791	1.15707	1.13062	1.11959	1.11219	1.14024	1.19336	1.14196	1.20164	1.22445	1.26562	1.25756	1.25593	1.26907	1.27601	1.2595	1.27255	1.29031	1.25521	1.25336	1.24115	1.22482	1.20612	1.20679	1.22067	1.17082	1.05045		0.0105807	0.0218784	0.0125675	0.0182369	0.0172578	0.0200163	0.0205306	0.00524698	-0.0132686	-0.00585912	-0.00447925	0.0293972	-0.00419809	0.00393384	0.0173208
	Netherlands Antilles	1.19876	1.2183	1.22545	1.23544	1.25713	1.27035	1.28491	1.28127	1.28561	1.27849	1.28107	1.28167	1.28209	1.29742	1.30773	1.31035	1.30745	1.30467	1.29405	1.29745	1.23224	1.21579	1.19841	1.16663	1.16502	1.16732	1.14902	1.12921	1.12482	1.12286	1.11756	1.09966		0.22632	0.242478	0.243762	0.244126	0.285491	0.305857	0.321747	0.319657	0.334822	0.355781	0.376614	0.380785	0.363104	0.388589	0.40394
	Saint Lucia	1.19876	1.2183	1.22545	1.23544	1.25713	1.27035	1.28491	1.28127	1.28561	1.27849	1.28107	1.28167	1.28209	1.29742	1.30773	1.31035	1.30745	1.30467	1.29405	1.29745	1.26658	1.25066	1.23277	1.19737	1.19517	1.19649	1.17849	1.15719	1.15316	1.17665	1.17152	1.15321		0.22632	0.242478	0.243762	0.244126	0.285491	0.305857	0.321747	0.319657	0.334822	0.355781	0.376614	0.380785	0.363104	0.388589	0.40394
	Chile	0.501414	0.497642	0.372671	0.362813	0.407934	0.34655	0.298249	0.28335	0.438609	0.6545	0.567092	0.474743	0.187282	0.200959	0.309892	0.351942	0.473327	0.563561	0.693508	0.794526	0.572308	0.41643	0.4195	0.476116	0.524381	0.461978	0.492799	0.632742	0.624076	0.541338	0.696405	0.679821		0.599277	0.60365	0.369308	0.415151	0.572098	0.474198	0.405213	0.388059	0.692968	1.05915	0.910004	0.750613	0.313711	0.323807	0.511792
	United States Virgin Islands	1.19876	1.2183	1.22545	1.23544	1.25713	1.27035	1.28491	1.28127	1.28561	1.27849	1.28107	1.28167	1.28209	1.29742	1.30773	1.31035	1.30745	1.30467	1.29405	1.29745	1.26658	1.25066	1.23277	1.19737	1.19517	1.19649	1.17849	1.15719	1.15316	1.17665	1.17152	1.15321		0.22632	0.242478	0.243762	0.244126	0.285491	0.305857	0.321747	0.319657	0.334822	0.355781	0.376614	0.380785	0.363104	0.388589	0.40394
	Bahamas	1.19876	1.2183	1.22545	1.23544	1.25713	1.27035	1.28491	1.28127	1.28561	1.27849	1.28107	1.28167	1.28209	1.29742	1.30773	1.31035	1.30745	1.30467	1.29405	1.29745	1.26658	1.25066	1.23277	1.19737	1.19517	1.19649	1.17849	1.15719	1.15316	1.17665	1.17152	1.15321		0.22632	0.242478	0.243762	0.244126	0.285491	0.305857	0.321747	0.319657	0.334822	0.355781	0.376614	0.380785	0.363104	0.388589	0.40394
	Haiti	0.274611	0.300366	0.455147	0.467822	0.501315	0.492236	0.522502	0.534209	0.566102	0.56127	0.528973	0.558518	0.561632	0.598404	0.600802	0.72455	0.783924	0.880384	0.711114	0.694949	0.622039	0.682071	0.691421	0.665132	0.680904	0.663773	0.668249	0.829319	0.78912	0.910169	0.892847	0.846138		-0.0212629	-0.016784	-1.11627e-06	0.0022463	0.00570092	0.00827569	0.0122327	0.0131609	0.0151381	0.0153514	0.0163851	0.0159181	0.0466278	0.0474392	0.047738
	Argentina	0.615933	0.617315	0.575133	0.559811	0.512016	0.468444	0.524254	0.532109	0.695944	0.709884	0.514834	0.59059	0.5929	0.555217	0.497658	0.55566	0.623217	0.539763	0.582339	0.693912	0.630075	0.522538	0.499571	0.531949	0.614836	0.609765	0.596776	0.659147	0.687736	0.626821	0.673069	0.696794		0.125161	0.131668	0.124169	0.12864	0.11296	0.118818	0.133789	0.127078	0.180628	0.168415	0.137483	0.152622	0.147171	0.150339	0.18177
	Antigua and Barbuda	1.19876	1.2183	1.22545	1.23544	1.25713	1.27035	1.28491	1.28127	1.28561	1.27849	1.28107	1.28167	1.28209	1.29742	1.30773	1.31035	1.30745	1.30467	1.29405	1.29745	1.26658	1.25066	1.23277	1.19737	1.19517	1.19649	1.17849	1.15719	1.15316	1.17665	1.17152	1.15321		0.22632	0.242478	0.243762	0.244126	0.285491	0.305857	0.321747	0.319657	0.334822	0.355781	0.376614	0.380785	0.363104	0.388589	0.40394
	Grenada	1.19876	1.2183	1.22545	1.23544	1.25713	1.27035	1.28491	1.28127	1.28561	1.27849	1.28107	1.28167	1.28209	1.29742	1.30773	1.31035	1.30745	1.30467	1.29405	1.29745	1.26658	1.25066	1.23277	1.19737	1.19517	1.19649	1.17849	1.15719	1.15316	1.17665	1.17152	1.15321		0.22632	0.242478	0.243762	0.244126	0.285491	0.305857	0.321747	0.319657	0.334822	0.355781	0.376614	0.380785	0.363104	0.388589	0.40394
	Dominican Republic	0.95696	0.923981	0.907168	0.917603	1.04188	1.02144	1.04981	1.05995	1.08961	1.05436	1.16313	1.16047	1.17002	1.07856	1.18586	1.19784	1.17025	1.21582	1.22977	1.19735	1.20578	1.23791	1.21264	1.17667	1.08886	1.04784	1.08341	1.05559	1.11894	1.15808	1.14265	1.09541		0.0201964	0.0234055	0.0131252	0.0107849	0.00398885	0.329872	0.0832047	0.339871	0.254926	0.0593331	0.0771123	0.313928	0.222907	0.262467	0.105886
	Saint Vincent and the Grenadines	0.0126291	0.61554	0.619176	0.624226	0.427854	0.432336	0.437235	0.330315	0.331487	0.329622	0.647242	0.964629	0.77465	0.783916	0.876377	0.878147	0.93781	0.935811	0.928207	0.930652	0.953304	1.09601	0.961785	0.960508	0.958763	0.981323	0.984227	0.98111	0.963095	0.982705	0.993289	0.990287		0.0304118	0.136387	0.136884	0.136945	0.11517	0.121677	0.126986	0.102049	0.106054	0.111609	0.203485	0.293295	0.230153	0.245432	0.279577
	Barbados	1.19876	1.2183	1.22545	1.23544	1.25713	1.27035	1.28491	1.28127	1.28561	1.27849	1.28107	1.28167	1.28209	1.29742	1.30773	1.31035	1.30745	1.30467	1.29405	1.29745	1.26658	1.25066	1.23277	1.19737	1.19517	1.19649	1.17849	1.15719	1.15316	1.17665	1.17152	1.15321		0.22632	0.242478	0.243762	0.244126	0.285491	0.305857	0.321747	0.319657	0.334822	0.355781	0.376614	0.380785	0.363104	0.388589	0.40394
	Venezuela (Bolivarian Republic of)	0.626096	0.678913	0.682238	0.651753	0.624826	0.609372	0.558786	0.480474	0.462954	0.452193	0.421407	0.32592	0.332168	0.351573	0.307388	0.328849	0.313485	0.293879	0.316522	0.282368	0.300443	0.371261	0.377899	0.387127	0.329488	0.298936	0.292527	0.303135	0.30047	0.317982	0.393122	0.375873		0.0908848	0.0913717	0.0937489	0.0951612	0.10291	0.100922	0.0980616	0.0883551	0.0878753	0.0818816	0.0843445	0.0794954	0.0775058	0.0816802	0.0793401
	Nicaragua	0.566744	0.610229	0.663612	0.82432	0.617647	0.625343	0.686561	0.695171	0.67413	0.436701	0.581884	0.616531	0.734648	0.642186	0.768503	0.815594	0.838036	0.883554	1.02752	0.992868	1.08605	1.07311	0.969145	0.864928	0.87907	0.784125	0.837193	0.805561	0.756784	0.788111	0.708927	0.62524		-0.00377044	-0.000773911	-0.00219584	0.0836597	0.135182	0.128264	0.108738	0.094358	0.0964886	0.126786	0.130852	0.140196	0.138233	0.118609	0.113585
	Suriname	0.512051	0.463699	0.246085	0.424296	0.307232	0.238948	0.462811	0.66651	0.591702	0.251144	0.292296	0.22612	0.221217	0.233732	0.234246	0.268145	0.124609	0.124323	0.122581	0.121396	0.626505	0.618883	0.601738	0.580546	0.575623	0.553831	0.535929	0.526233	0.521215	0.535143	0.532857	0.524506		0.112899	0.109662	0.0711122	0.101886	0.0903965	0.0791742	0.132863	0.178981	0.168445	0.091414	0.106533	0.0895029	0.0851512	0.0920496	0.0944465
	Guatemala	0.560304	0.901122	0.776545	0.544583	0.707976	0.675835	0.0261357	0.112696	0.118698	0.0570594	-0.172577	-0.128521	-0.00920257	-0.00388601	0.00869066	0.129988	0.0751483	0.0268135	0.324227	0.227843	0.35927	0.402849	0.51966	0.450475	0.285379	0.245056	0.304232	0.367991	0.314426	0.0104325	-0.10142	-0.244369		-0.232083	0.00238764	-0.014067	-0.00953232	-0.00654976	-0.00513588	-0.0171674	-0.0200994	-0.0233331	-0.029113	-0.200224	-0.217994	-0.236656	-0.225501	-0.221533
	Honduras	0.17926	0.206148	0.245831	0.289287	0.226687	0.228592	0.151875	0.175136	0.124843	0.124783	0.118855	0.118166	0.11464	0.123212	0.210151	0.3769	0.447612	0.444744	0.57853	0.439181	0.499061	0.665258	0.779396	0.761867	0.878303	0.798879	0.74926	0.722091	0.713547	0.651591	0.642205	0.625916		0.0355237	0.036136	0.0369053	0.0378161	0.0361848	0.0356753	0.0335047	0.0340772	0.0329431	0.0334362	0.0333972	0.0338749	0.0336611	0.0338334	0.0365029
	Dominica	NA	0.0127784	0.0129036	0.0130115	0.013217	0.641841	0.649154	0.647299	0.649528	0.645911	0.647242	0.647582	0.647791	0.65554	0.6607	0.878147	0.876203	0.788267	0.781871	0.655556	0.729535	0.897165	0.710158	0.802602	0.688586	0.858368	0.845468	0.871059	0.868061	0.885733	0.823969	0.773062		NA	0.0302955	0.0300051	0.0297646	0.0300099	0.167722	0.175676	0.174585	0.18231	0.192999	0.203485	0.205806	0.196915	0.209643	0.217396
	Cayman Islands	1.19876	1.2183	1.22545	1.23544	1.25713	1.27035	1.28491	1.28127	1.28561	1.27849	1.28107	1.28167	1.28209	1.29742	1.30773	1.31035	1.30745	1.30467	1.29405	1.29745	1.26658	1.25066	1.23277	1.19737	1.19517	1.19649	1.17849	1.15719	1.15316	1.17665	1.17152	1.15321		0.22632	0.242478	0.243762	0.244126	0.285491	0.305857	0.321747	0.319657	0.334822	0.355781	0.376614	0.380785	0.363104	0.388589	0.40394
	Brazil	0.250551	0.260727	0.251019	0.231606	0.235763	0.241303	0.283926	0.258519	0.254286	0.253147	0.241967	0.246866	0.242171	0.247235	0.239117	0.244887	0.245215	0.249332	0.247298	0.273405	0.275798	0.281465	0.250874	0.227889	0.241975	0.226928	0.22183	0.206702	0.227705	0.179383	0.17529	0.172118		0.149447	0.189943	0.179196	0.129762	0.151273	0.150393	0.183152	0.154448	0.132889	0.158034	0.131965	0.148409	0.134044	0.133257	0.116868
	Puerto Rico	1.18091	1.20722	1.21453	1.22356	1.24339	1.25081	1.26179	1.25675	1.26026	1.25311	1.26949	1.27228	1.27141	1.28789	1.30312	1.30438	1.29803	1.29778	1.28738	1.28786	1.25796	1.24344	1.22698	1.19242	1.18831	1.19033	1.17164	1.14898	1.14498	1.16709	1.1632	1.14522		0.223372	0.240527	0.241838	0.242043	0.28267	0.301563	0.316435	0.314047	0.328744	0.34925	0.373451	0.378192	0.360305	0.385933	0.402609
	Saint Kitts and Nevis	1.19876	1.2183	1.22545	1.23544	1.25713	1.27035	1.28491	1.28127	1.28561	1.27849	1.28107	1.28167	1.28209	1.29742	1.30773	1.31035	1.30745	1.30467	1.29405	1.29745	1.26658	1.25066	1.23277	1.19737	1.19517	1.19649	1.17849	1.15719	1.15316	1.17665	1.17152	1.15321		0.22632	0.242478	0.243762	0.244126	0.285491	0.305857	0.321747	0.319657	0.334822	0.355781	0.376614	0.380785	0.363104	0.388589	0.40394
	Paraguay	-0.0301541	-0.0706207	-0.0217546	-0.0422944	-0.0599181	0.00837204	0.0127806	0.0124862	0.0145813	0.0126427	0.0135829	0.0136515	0.0136691	0.0132631	0.0137999	0.0137744	0.0137411	0.013686	0.0138926	0.0119603	0.0134718	0.0134271	0.0133424	0.013068	0.0131422	0.0130531	0.0129153	0.012662	0.0127506	0.0129884	0.0130133	0.0127742		-0.0677306	-0.0866148	-0.0467673	-0.0573708	-0.0681754	0.0124857	0.0237561	0.0248064	0.0280697	0.0287295	0.029704	0.030214	0.0300659	0.0289445	0.0303519
	Belize	-0.229451	-0.229175	-0.234084	-0.236182	-0.0891221	-0.0882724	0.0405418	0.0420038	0.142018	0.143377	0.303853	0.36602	0.473894	0.524907	0.487042	0.243609	0.0993607	0.163375	0.0972657	0.0923492	0.0194586	-0.20273	-0.217372	0.132328	0.0034573	0.0733822	-0.186935	-0.183041	-0.269127	-0.908297	-0.806206	-0.682354		-0.684549	-0.672475	-0.664024	-0.657416	-0.548324	-0.525971	-0.440643	-0.439961	-0.372236	-0.366652	-0.250934	-0.213572	-0.155752	-0.1067	-0.126288
	Guadeloupe	1.19876	1.2183	1.22545	1.23544	1.25713	1.27035	1.21879	1.22289	1.23231	1.22119	1.23233	1.23719	1.24117	1.25869	1.27066	1.27321	1.27413	1.27343	1.25289	1.25619	1.21628	1.20143	1.1717	1.06117	1.06037	1.06255	1.05066	1.03166	1.02815	1.07491	1.07149	1.0559		0.22632	0.242478	0.243762	0.244126	0.285491	0.305857	0.321023	0.319072	0.333743	0.353813	0.374146	0.37856	0.361631	0.38638	0.401423
	Guyana	1.19876	1.2183	1.22545	1.23544	1.25713	1.27035	1.28491	1.28127	1.28561	1.27849	1.28107	1.28167	1.28209	1.29742	1.30773	1.31035	1.30745	1.30467	1.29405	1.29745	1.26658	1.25066	1.23277	1.19737	1.19517	1.19649	1.17849	1.15719	1.15316	1.17665	1.17152	1.15321		0.22632	0.242478	0.243762	0.244126	0.285491	0.305857	0.321747	0.319657	0.334822	0.355781	0.376614	0.380785	0.363104	0.388589	0.40394
	French Guiana	1.19876	1.2183	1.22545	1.23544	1.25713	1.27035	1.28491	1.28127	1.28561	1.27849	1.28107	1.28167	1.28209	1.29742	1.30773	1.31035	1.30745	1.30467	1.29405	1.29745	1.26658	1.25066	1.23277	1.19737	1.19517	1.19649	1.17849	1.15719	1.07728	0.0906885	0.087341	0.0833979		0.22632	0.242478	0.243762	0.244126	0.285491	0.305857	0.321747	0.319657	0.334822	0.355781	0.376614	0.380785	0.363104	0.388589	0.40394
	Panama	0.515566	0.201502	0.412973	0.611081	0.289767	0.193377	0.19526	0.25934	0.117326	0.181494	0.238135	0.353264	0.415406	0.355163	0.355103	0.422266	0.37504	0.413611	0.551822	0.387012	0.379114	0.655133	0.457205	0.615005	0.42817	0.446487	0.498288	0.528826	0.468103	0.528455	0.525055	0.530573		0.00558587	-0.0895473	-0.0884583	-0.0595244	-0.0677493	-0.0285671	-0.0296237	-0.0200317	-0.0452786	-0.00522674	0.0110167	0.00340763	0.0168941	0.0288841	0.0294539
Eurasia	Armenia	NA	NA	NA	NA	NA	NA	NA	NA	NA	NA	NA	NA	0.809629	0.36113	0.431281	0.696566	0.416466	0.54809	0.53478	0.451153	0.484434	0.504878	0.308324	0.291993	0.311536	0.304548	0.261054	0.259359	0.308229	0.214898	0.232506	0.241552		NA	NA	NA	NA	NA	NA	NA	NA	NA	NA	NA	NA	0.0917835	0.0783344	0.0866042
	Tajikistan	NA	NA	NA	NA	NA	NA	NA	NA	NA	NA	NA	NA	0.0661938	0.0485542	0.0306276	0.0253696	0.0251395	0.0342393	0.032032	0.0366386	0.0283619	0.0250923	0.0221888	0.022954	0.0218484	0.0196101	0.0260071	0.0324435	0.0313175	0.0312367	0.0458504	0.0588092		NA	NA	NA	NA	NA	NA	NA	NA	NA	NA	NA	NA	0.0408006	0.0372805	0.0340664
	Kyrgyzstan	NA	NA	NA	NA	NA	NA	NA	NA	NA	NA	NA	NA	0.270307	0.258164	0.135742	0.127221	0.139878	0.171629	0.188706	0.103636	0.180723	0.204596	0.212719	0.159287	0.163605	0.160289	0.154232	0.164871	0.115876	0.139211	0.125321	0.100536		NA	NA	NA	NA	NA	NA	NA	NA	NA	NA	NA	NA	0.173151	0.21725	0.136266
	Belarus	NA	NA	NA	NA	NA	NA	NA	NA	NA	NA	NA	NA	1.1411	1.14651	1.14701	1.15381	1.12739	1.1053	1.10012	1.1021	1.07083	1.06473	1.05659	1.03203	1.03957	1.02522	1.01277	0.982271	0.996676	1.04626	1.00299	0.974019		NA	NA	NA	NA	NA	NA	NA	NA	NA	NA	NA	NA	0.17994	0.184541	0.185568
	Latvia	NA	NA	NA	NA	NA	NA	NA	NA	NA	NA	NA	NA	0.365043	0.314667	0.320635	0.311268	0.488487	0.376622	0.366625	0.373903	0.339039	0.356734	0.391953	0.410735	0.315485	0.296595	0.417016	0.38724	0.376367	0.348932	0.435407	0.489131		NA	NA	NA	NA	NA	NA	NA	NA	NA	NA	NA	NA	0.0924021	0.0643265	0.0519322
	Ukraine	NA	NA	NA	NA	NA	NA	NA	NA	NA	NA	NA	NA	1.29777	1.19942	1.15957	1.12853	0.967479	0.939619	0.8865	0.944935	0.90768	0.910312	0.918982	0.88675	0.779306	0.803356	0.886429	0.88578	0.907313	0.926951	0.91591	0.89601		NA	NA	NA	NA	NA	NA	NA	NA	NA	NA	NA	NA	0.908675	0.833824	0.836362
	Azerbaijan	NA	NA	NA	NA	NA	NA	NA	NA	NA	NA	NA	NA	1.21105	1.17335	1.15372	1.17792	1.1771	1.15665	1.13888	1.17983	1.16407	1.06916	1.0131	0.995389	0.969337	0.945619	0.967162	0.925422	0.910916	0.894308	0.824718	0.869068		NA	NA	NA	NA	NA	NA	NA	NA	NA	NA	NA	NA	0.0654668	0.064779	0.0945303
	Lithuania	NA	NA	NA	NA	NA	NA	NA	NA	NA	NA	NA	NA	0.262011	0.144846	0.225537	0.154012	0.174378	0.206739	0.258415	0.280869	0.244118	0.217725	0.183605	0.174408	0.186671	0.261691	0.251733	0.22425	0.216302	0.211352	0.790344	0.755875		NA	NA	NA	NA	NA	NA	NA	NA	NA	NA	NA	NA	0.114605	0.110185	0.108366
	Estonia	NA	NA	NA	NA	NA	NA	NA	NA	NA	NA	NA	NA	1.65462	1.67307	1.6874	1.69474	1.69002	1.68323	1.66531	1.67239	1.63256	1.62753	1.61875	1.59242	1.6008	1.57428	1.55353	1.54174	1.53539	1.43302	1.34905	1.30055		NA	NA	NA	NA	NA	NA	NA	NA	NA	NA	NA	NA	2.04656	2.01558	2.1234
	Kazakhstan	NA	NA	NA	NA	NA	NA	NA	NA	NA	NA	NA	NA	1.43506	1.43035	1.37865	1.41506	1.41373	1.40072	1.39958	1.4015	1.34299	1.34972	1.32011	1.32623	1.36611	1.35732	1.33473	1.338	1.37137	1.37312	1.40591	1.38706		NA	NA	NA	NA	NA	NA	NA	NA	NA	NA	NA	NA	1.60267	1.58108	1.56986
	Georgia	NA	NA	NA	NA	NA	NA	NA	NA	NA	NA	NA	NA	0.467545	0.353232	0.259723	0.288896	0.201268	0.187404	0.2393	0.22641	0.233614	0.21436	0.0806939	0.0985599	0.137024	0.151017	0.273115	0.183229	0.156565	0.141839	0.0852722	0.0426474		NA	NA	NA	NA	NA	NA	NA	NA	NA	NA	NA	NA	0.106573	0.0842665	0.0718987
	Uzbekistan	NA	NA	NA	NA	NA	NA	NA	NA	NA	NA	NA	NA	0.970403	0.954544	0.965329	0.983999	0.970465	0.989457	0.985089	0.986055	0.970457	0.966961	0.959333	0.907128	0.882593	0.878559	0.862728	0.891234	0.793175	0.850359	0.826547	0.826727		NA	NA	NA	NA	NA	NA	NA	NA	NA	NA	NA	NA	0.288547	0.31864	0.356775
	Turkmenistan	NA	NA	NA	NA	NA	NA	NA	NA	NA	NA	NA	NA	1.05494	1.06776	1.0684	1.07485	1.07239	1.06829	1.0638	1.06837	1.05337	1.04991	1.04328	1.02181	1.02741	1.02044	1.00967	0.989869	0.996795	1.01539	1.01733	0.99864		NA	NA	NA	NA	NA	NA	NA	NA	NA	NA	NA	NA	0.229803	0.229576	0.230738
	Russian Federation & U.S.S.R.	1.16462	1.17782	1.18735	1.19101	1.16986	1.16246	1.16973	1.15095	1.13358	1.13068	1.13711	1.13427	1.09053	1.07192	1.08995	1.09742	1.09625	1.07204	1.08823	1.04862	1.02583	0.990975	0.987198	0.973433	0.939317	0.935612	0.946374	0.899731	0.95067	0.908643	0.909692	0.915159		1.03182	1.02697	1.01713	1.00426	0.981407	0.955039	0.955921	0.943472	0.931973	0.950848	0.954565	0.967908	0.989819	1.01271	1.15397
Europe	Hungary	1.58056	1.59921	1.62161	1.47324	1.42428	1.23859	1.2198	1.06034	0.944329	0.910479	0.8999	0.906352	0.938072	0.962069	0.953473	0.974419	0.991961	0.98801	1.00738	1.02395	0.972406	0.969965	0.984472	1.05246	0.955071	0.798228	0.830064	0.804291	0.775064	0.644672	0.654971	0.671317		4.1158	4.10358	4.12589	3.66674	3.62384	2.8687	2.87248	2.6586	2.53784	2.41191	2.49727	2.27842	2.41803	2.30057	2.20837
	Czech Republic	NA	NA	NA	NA	NA	NA	NA	NA	NA	NA	NA	NA	NA	1.34358	1.32191	1.35014	1.34989	1.34149	1.34067	1.3085	1.34602	1.31572	1.21705	1.12077	1.10132	1.10429	1.06553	1.06822	1.02436	0.985257	0.967821	0.91873		NA	NA	NA	NA	NA	NA	NA	NA	NA	NA	NA	NA	NA	3.62971	3.58254
	Gibraltar	1.38407	1.41334	1.45596	1.49109	1.56855	1.60077	1.61944	1.61602	1.61742	1.60917	1.61993	1.62364	1.61096	1.65074	1.63182	1.62863	1.59055	1.53478	1.52987	1.53212	1.51677	1.48366	1.45735	1.40186	1.37751	1.3241	1.26987	1.25001	1.17992	1.18389	1.16609	1.21195		1.00397	1.09491	1.26615	1.3873	1.70021	1.79787	1.85129	1.85457	1.80301	1.84996	1.8699	1.85853	1.77654	1.88581	1.82484
	Serbia	NA	NA	NA	NA	NA	NA	NA	NA	NA	NA	NA	NA	1.32781	1.35637	1.33411	1.34607	1.26965	1.34378	1.28564	1.17013	1.2534	1.24102	1.27279	1.35636	1.33069	1.25307	1.30746	1.32156	1.36482	1.35854	1.28251	1.18359		NA	NA	NA	NA	NA	NA	NA	NA	NA	NA	NA	NA	5.55837	5.66843	5.62002
	Cyprus	1.24848	1.26323	1.27561	1.28628	1.3066	1.31757	1.32432	1.31788	1.32932	1.31797	1.32562	1.33357	1.33401	1.35022	1.35103	1.35919	1.35608	1.35089	1.34521	1.351	1.33203	1.32766	1.31927	1.29211	1.2992	1.29039	1.27677	1.25173	1.25358	1.28399	1.24617	1.21936		0.0683255	0.0680643	0.0674118	0.0668716	0.0674227	0.0664732	0.0665149	0.0663076	0.066947	0.0678901	0.0682006	0.0692593	0.0690336	0.0689655	0.0693146
	Denmark	1.29734	1.32451	1.35469	1.37517	1.39932	1.39952	1.39834	1.3955	1.38912	1.35992	1.34215	1.35485	1.30483	1.29592	1.28651	1.24674	1.26397	1.16231	1.0659	0.991631	0.894407	0.882641	0.837014	0.842636	0.70081	0.597164	0.764588	0.657713	0.61076	0.604484	0.486708	0.389768		1.00504	1.05176	1.10781	1.14187	1.16146	1.11791	1.10762	1.12012	1.09975	1.09612	1.10298	1.12807	1.06879	1.04378	0.997884
	Bosnia and Herzegovina	NA	NA	NA	NA	NA	NA	NA	NA	NA	NA	NA	NA	0.889382	0.541358	0.341565	0.322233	0.558059	0.881348	0.987393	0.893577	0.948594	0.946883	0.935033	1.07992	0.957074	0.938374	0.993569	1.1533	1.15316	1.0782	0.951109	0.828571		NA	NA	NA	NA	NA	NA	NA	NA	NA	NA	NA	NA	1.63633	0.988554	0.612286
	Italy	0.829838	0.853336	0.855318	0.86727	0.861932	0.889391	0.886982	0.957774	0.935388	1.00566	1.0323	0.978968	0.968326	0.965542	0.963566	1.01606	0.98276	0.971074	0.96625	0.93678	0.929267	0.913455	0.943486	0.933258	0.899949	0.898361	0.883169	0.867128	0.834669	0.779125	0.746456	0.70702		0.160541	0.181356	0.210541	0.213179	0.254812	0.264893	0.263772	0.266269	0.265218	0.263207	0.285073	0.257585	0.206819	0.183441	0.194563
	France	0.601393	0.463274	0.479315	0.390759	0.302893	0.251563	0.189307	0.167597	0.156174	0.191976	0.17451	0.202848	0.169538	0.118022	0.113341	0.123014	0.133919	0.118831	0.16134	0.140702	0.131855	0.10958	0.11988	0.125288	0.119849	0.132976	0.117621	0.118397	0.112373	0.109924	0.115045	0.0899982		0.270182	0.237766	0.25537	0.235551	0.212743	0.191107	0.166538	0.155658	0.15133	0.1685	0.164228	0.173812	0.161852	0.142284	0.138825
	Poland	1.52206	1.54073	1.56559	1.57651	1.60695	1.61452	1.62772	1.62539	1.63883	1.62884	1.63826	1.6418	1.64112	1.66375	1.66162	1.66983	1.66472	1.65244	1.64059	1.65049	1.62599	1.60934	1.59139	1.57144	1.56084	1.52694	1.50356	1.45187	1.42941	1.39441	1.36262	1.30148		3.12341	3.1264	3.13392	3.11072	3.15792	3.10898	3.12255	3.11983	3.15054	3.20089	3.21597	3.25615	3.24437	3.24319	3.25019
	Sweden	0.0886578	0.0426629	0.0447464	0.0361588	0.0353104	0.0529221	0.0553462	0.0498915	0.0477774	0.0400217	0.0265248	0.0408462	0.0432022	0.0487141	0.0582712	0.0527284	0.0892861	0.0464981	0.0425408	0.0453007	0.0187388	0.030245	0.0375367	0.0484248	-0.00276624	-0.0128428	-0.0199787	-0.0308986	-0.0323564	-0.0521972	-0.0335653	-0.0116948		0.0474488	0.055534	0.059303	0.0611374	0.0692435	0.0766341	0.0854743	0.0804857	0.082169	0.0779278	0.0729193	0.0865478	0.078246	0.0782135	0.0890598
	Norway	0.0117052	0.0116621	0.012817	0.0131842	0.0134777	0.0136104	0.0143491	0.0144609	0.0140503	0.0137648	0.0111524	0.0111081	0.0111164	0.010919	0.0116363	0.0115422	0.0120901	0.0122396	0.0116476	0.0121431	0.011497	0.0106213	0.0111627	0.0106125	0.0106449	0.0112696	0.0114603	0.0127072	0.0110051	0.0330379	0.0364744	0.0309143		0.0301019	0.0299845	0.0296798	0.0297442	0.0300268	0.0295162	0.0293736	0.0292388	0.0295506	0.0299454	0.0302789	0.0306456	0.0306147	0.030267	0.029971
	Portugal	0.51386	0.707321	0.606725	0.620216	0.556702	0.480642	0.694203	0.678719	0.530214	0.97661	0.863639	0.887	1.07383	0.941351	0.856699	0.987598	0.749389	0.799968	0.828917	0.995422	0.846974	0.780601	0.926906	0.710161	0.807475	0.902726	0.728601	0.661302	0.668476	0.627563	0.396615	0.464023		0.0391448	0.0404832	0.0282984	0.0243198	0.0192551	0.0645857	0.206233	0.324644	0.314861	0.376939	0.415603	0.430343	0.451175	0.478055	0.480544
	Romania	0.997658	0.930534	0.949153	0.999905	0.99241	1.07783	1.11697	1.11063	1.1074	1.11452	1.08559	0.978236	1.04586	1.04932	1.05586	1.00635	1.01003	0.850187	0.769044	0.769622	0.879449	0.90072	0.872356	0.952299	0.858952	0.799047	0.861481	0.846854	0.788938	0.750712	0.667306	0.77467		2.15228	0.939539	0.988915	1.08477	1.05098	2.11197	2.1033	2.20407	2.52074	2.51385	1.9858	1.92282	2.35518	2.37957	2.47175
	Belgium	0.938948	0.947039	0.927377	0.723297	0.685291	0.55064	0.466872	0.467642	0.479369	0.522563	0.534063	0.532963	0.514188	0.534576	0.563578	0.555492	0.527562	0.477208	0.512005	0.433613	0.463207	0.426943	0.418111	0.411073	0.411129	0.393854	0.357105	0.327127	0.302013	0.288293	0.288062	0.223359		0.272161	0.317523	0.342092	0.311881	0.332237	0.279323	0.265469	0.264103	0.273662	0.283193	0.29475	0.288256	0.278655	0.283453	0.289021
	Slovakia	NA	NA	NA	NA	NA	NA	NA	NA	NA	NA	NA	NA	NA	0.645069	0.590107	0.685349	0.671177	0.70189	0.676327	0.656561	0.541736	0.534303	0.478531	0.534401	0.533207	0.495701	0.4482	0.438781	0.422314	0.426302	0.393841	0.402009		NA	NA	NA	NA	NA	NA	NA	NA	NA	NA	NA	NA	NA	1.27383	1.1013
	Germany	1.18679	1.19329	1.19392	1.21173	1.17395	1.11019	1.13663	1.09817	1.07741	1.06018	1.07914	1.08815	1.04275	1.05405	1.04078	1.03344	1.02071	0.988666	0.995727	0.969222	0.95535	0.930983	0.929802	0.918853	0.88673	0.882865	0.831191	0.806096	0.773493	0.714651	0.702082	0.693278		2.56227	2.63673	2.65104	2.69255	2.62866	2.46067	2.47528	2.38172	2.35532	2.36544	2.39774	2.42583	2.33235	2.33907	2.31147
	Greece	1.25954	1.3331	1.34627	1.47917	1.47125	1.52584	1.53389	1.5697	1.6416	1.65279	1.66265	1.58336	1.64163	1.67528	1.67502	1.62821	1.59845	1.62082	1.61507	1.56464	1.55875	1.60073	1.55343	1.45398	1.4573	1.44029	1.36131	1.40608	1.37946	1.37055	1.29126	1.29045		4.86691	5.70761	5.80256	6.57793	6.4982	6.76616	7.05317	7.24742	7.81491	7.96117	7.88008	7.3234	7.83887	7.9994	8.08163
	Luxembourg	1.09142	1.0245	0.83943	0.904762	1.07013	1.14568	1.0315	1.03132	1.00089	1.21171	1.22885	1.22039	1.16696	1.23869	1.08747	0.836905	0.877253	0.696358	0.445856	0.517082	0.430111	0.530324	1.19092	1.16337	1.16421	1.15189	1.12474	1.07237	1.03032	1.07532	1.07444	0.98482		1.09596	1.15841	1.0796	1.09644	1.3151	1.40955	1.27244	1.09635	1.18103	1.42064	1.47366	1.5021	1.4157	1.50659	1.23738
	Netherlands	0.857242	0.893709	0.969869	0.984711	1.01422	1.00156	0.992736	1.00439	1.06881	1.0403	1.07681	1.05031	1.03688	1.02936	1.05096	1.06298	1.01371	1.00141	0.992128	0.948923	0.938909	0.933916	0.909084	0.901958	0.866368	0.788456	0.777829	0.798029	0.75764	0.735167	0.714727	0.675094		0.128806	0.148108	0.232108	0.253595	0.269978	0.259928	0.248621	0.260031	0.322309	0.31222	0.345567	0.313766	0.303767	0.29039	0.314518
	Faeroe Islands	0.895378	0.905961	0.938891	0.946741	0.983252	1.01069	1.01587	1.01093	0.934556	0.861346	0.842176	0.847227	0.747113	0.799871	0.765934	0.770562	0.852693	0.800267	0.796904	0.905221	0.846246	0.889581	0.785027	0.847229	0.773087	0.710527	0.727973	0.707174	0.762031	0.776243	0.930545	0.763442		0.057493	0.0572732	0.0574367	0.0569764	0.0580695	0.0577942	0.0578304	0.0576502	0.0558023	0.0547048	0.0542579	0.0551002	0.0520084	0.0532077	0.0524872
	Iceland	0.0295947	0.0350543	0.0199556	0.0167974	0.0169152	0.0171253	0.0176183	0.0178327	0.0179049	0.0178742	0.0185493	0.018313	0.0173475	0.0179337	0.0178991	0.0183538	0.0190112	0.0189505	0.0219051	0.0262729	0.0270514	0.0276217	0.0267002	0.0257394	0.0263609	0.0276899	0.0330455	0.0350072	0.0311522	0.0344969	0.0338622	0.0341393		0.0354603	0.0422645	0.042788	0.0431983	0.0430347	0.0426627	0.0440786	0.0449718	0.0451217	0.046187	0.0484042	0.0479235	0.0443364	0.0456014	0.0456732
	Croatia	NA	NA	NA	NA	NA	NA	NA	NA	NA	NA	NA	NA	0.597608	0.629593	0.434114	0.501294	0.360939	0.561343	0.616605	0.576876	0.565255	0.570788	0.684501	0.760848	0.570063	0.608023	0.621718	0.749206	0.678678	0.545271	0.465849	0.391396		NA	NA	NA	NA	NA	NA	NA	NA	NA	NA	NA	NA	0.0445868	0.114877	0.0589108
	Austria	0.337271	0.32813	0.326031	0.333092	0.35839	0.344852	0.339035	0.404977	0.297998	0.328225	0.408974	0.438851	0.339061	0.296729	0.341175	0.339039	0.387262	0.377123	0.345882	0.324432	0.315588	0.359767	0.358188	0.450426	0.406209	0.396037	0.347561	0.285528	0.280753	0.253602	0.314829	0.272354		0.107562	0.136504	0.130599	0.131544	0.145783	0.142356	0.133161	0.162715	0.125979	0.144111	0.177507	0.190935	0.143324	0.114008	0.132065
	Turkey	0.801549	0.754454	0.764456	0.955987	0.941656	1.10371	1.13452	0.883917	0.619115	0.926046	0.878237	0.905356	0.907368	0.814833	0.915103	0.86442	0.847119	0.888389	0.886543	0.968784	0.996412	1.05432	0.933216	0.898634	0.84384	0.916407	0.893293	0.948531	0.982526	0.967564	0.877402	0.889479		1.41512	1.33104	1.33877	1.69007	1.79733	2.33038	2.49057	1.94815	1.34563	1.97163	1.8599	1.92953	1.95569	1.72177	1.94184
	Montenegro	NA	NA	NA	NA	NA	NA	NA	NA	NA	NA	NA	NA	NA	NA	NA	NA	NA	NA	NA	NA	NA	NA	NA	NA	NA	NA	0.622631	0.642876	0.684289	0.396101	0.501537	0.545785		NA	NA	NA	NA	NA	NA	NA	NA	NA	NA	NA	NA	NA	NA	NA
	Switzerland	0.031915	0.0286099	0.0289848	0.0298567	0.0294011	0.0294119	0.0303161	0.0302009	0.0156954	0.0325127	0.017526	0.0227749	0.0238039	0.0171592	0.0226299	0.0245567	0.0192311	0.0182147	0.0214211	0.0177856	0.0166902	0.0143049	0.0139181	0.0145686	0.0129854	0.010438	0.00725948	0.00608242	0.00423889	0.002933	0.00674051	0.00635379		0.0575214	0.0586595	0.0570648	0.0571503	0.0647328	0.0665344	0.0649146	0.0618582	0.060405	0.0683973	0.0659333	0.0641037	0.0639503	0.0620581	0.0619289
	Ireland	0.963828	0.901648	0.85688	0.840706	0.855813	0.863654	1.094	1.31198	1.27895	1.28963	1.29851	1.29703	1.32329	1.30755	1.29642	1.31187	1.2739	1.24401	1.21282	1.18369	1.15293	1.16759	1.11235	1.05045	1.04826	1.04251	0.968512	0.913958	0.877806	0.820124	0.825058	0.776308		0.0353343	0.0388527	0.0504209	0.055037	0.0564566	0.0598745	0.287046	0.760211	0.815838	0.856816	0.823987	0.776097	0.824232	0.780339	0.758547
	United Kingdom	1.41598	1.42499	1.39548	1.37767	1.33657	1.35395	1.39123	1.37949	1.35767	1.30659	1.32223	1.317	1.25145	1.13248	1.07386	1.0544	1.00908	0.896825	0.886307	0.83926	0.879511	0.868404	0.836331	0.846184	0.841718	0.82408	0.863343	0.833889	0.832209	0.741173	0.762982	0.70236		1.21183	1.23343	1.17894	1.15351	0.772906	0.993272	1.1043	1.11634	1.08967	1.06892	1.06236	1.09637	1.01332	0.894066	0.837885
	Slovenia	NA	NA	NA	NA	NA	NA	NA	NA	NA	NA	NA	NA	0.666715	0.680713	0.621745	0.633756	0.594282	0.645069	0.640546	0.60154	0.592678	0.597353	0.626159	0.62697	0.576165	0.589021	0.601354	0.602097	0.53531	0.54164	0.551419	0.556867		NA	NA	NA	NA	NA	NA	NA	NA	NA	NA	NA	NA	2.1242	2.15555	1.97668
	Bulgaria	1.06196	0.988122	1.00898	0.97649	1.00592	0.943666	1.00968	1.01174	0.870585	0.883744	0.991662	0.977768	1.00067	0.944457	0.917351	0.870526	0.822172	0.877728	0.862156	0.848508	0.803952	0.853596	0.752276	0.845563	0.847961	0.773891	0.765396	0.924367	0.912227	0.8867	0.872199	0.840636		2.77675	2.58159	2.62544	2.49837	2.5473	2.03931	2.33263	2.42435	2.0149	2.09352	2.81341	2.80932	2.83513	2.57727	2.54896
	Finland	0.664627	0.33892	0.322978	0.323435	0.370826	0.482233	0.470119	0.483019	0.372946	0.509471	0.559374	0.556525	0.289006	0.330048	0.424629	0.371352	0.479541	0.370725	0.234084	0.285346	0.25726	0.34071	0.351005	0.454196	0.377946	0.215944	0.376601	0.335851	0.223564	0.280219	0.321193	0.24199		0.51528	0.259768	0.265873	0.281122	0.316026	0.396636	0.378573	0.386861	0.310076	0.395715	0.420699	0.427769	0.226028	0.259171	0.3316
	Albania	0.255019	0.234854	0.215349	0.19884	0.183125	0.172467	0.165188	0.090615	0.0839399	0.0870585	0.147138	0.0680388	0.061513	0.0758239	0.0553506	0.0725156	0.0550917	0.0503014	0.0482293	0.0387568	0.0501793	0.0568755	0.0709066	0.0254644	0.0318826	0.027325	0.0330165	0.0390251	0.0291682	0.0129884	0.0130133	0.0127742		0.0378479	0.037003	0.0360023	0.0351802	0.0349247	0.034088	0.0338796	0.0316933	0.0317883	0.0323469	0.0342129	0.0324155	0.0321199	0.0324766	0.0320509
	Spain	0.937438	0.997688	0.993039	0.990311	0.835687	0.833227	0.802424	0.745702	0.576685	0.763697	0.745177	0.734444	0.8218	0.774529	0.757721	0.818415	0.664718	0.736645	0.725735	0.841509	0.804409	0.722354	0.814017	0.699829	0.740364	0.785423	0.698674	0.689662	0.614095	0.559911	0.448403	0.513916		0.441497	0.505579	0.56732	0.607848	0.611832	0.635319	0.629013	0.590898	0.458544	0.60971	0.597039	0.584591	0.624971	0.612987	0.589554
Middle East	Qatar	0.994325	1.00443	1.01408	1.02068	1.03756	1.0441	1.04973	1.04458	1.05123	1.04225	1.04831	1.05459	1.05494	1.06776	1.0684	1.07485	1.07239	1.06829	1.0638	1.06837	1.05337	1.04991	1.04328	1.02181	1.02741	1.02044	1.00967	0.989869	0.996795	1.01539	1.01733	0.99864		0.223164	0.223299	0.221273	0.220584	0.221972	0.220064	0.220045	0.219384	0.222857	0.225996	0.22703	0.230554	0.229803	0.229576	0.230738
	Iraq	1.11447	1.15226	1.18525	1.2222	1.24605	1.25677	1.26623	1.25798	1.23197	1.22096	1.24027	1.26715	1.24823	1.26636	1.26236	1.27407	1.27065	1.26958	1.26725	1.26878	1.25343	1.25612	1.26277	1.2437	1.26289	1.14732	1.07615	1.06688	1.05461	0.988929	0.969875	0.91979		0.0998471	0.0826656	0.0841687	0.0740141	0.0751395	0.0772582	0.0773475	0.0796896	0.100494	0.106469	0.0942165	0.0950126	0.0952935	0.0976092	0.103204
	Saudi Arabia	1.15922	1.14674	1.1458	1.16219	1.17828	1.19068	1.1916	1.17532	1.18189	1.17633	1.18248	1.18796	1.18048	1.19403	1.19706	1.1988	1.19327	1.18936	1.17975	1.18346	1.17654	1.18777	1.18813	1.16139	1.17257	1.1636	1.14402	1.11492	1.11957	1.16975	1.181	1.15123		0.10786	0.098847	0.0939735	0.0953815	0.0954539	0.0948786	0.0933509	0.0898429	0.0895946	0.092281	0.092488	0.093414	0.090626	0.0902909	0.0914719
	Lebanon	0.852251	0.868353	0.980675	1.03163	1.04701	1.03598	1.06497	1.04324	1.04904	1.06328	1.16772	1.1009	1.12428	1.13792	1.13269	1.17478	1.19491	1.20286	1.21493	1.29542	1.25342	1.28229	1.24001	1.14881	1.17891	1.17813	1.19807	1.1895	1.2247	1.22046	1.19823	1.18399		0.0561699	0.0561373	0.0586745	0.0594502	0.0599138	0.0585092	0.0592128	0.0585615	0.0590344	0.0605358	0.0636467	0.0624853	0.0629496	0.062887	0.063035
	United Arab Emirates	0.99699	1.00886	1.01867	1.0272	1.04342	1.05216	1.05761	1.05242	1.06157	1.05248	1.0586	1.06493	1.06527	1.07823	1.07889	1.08368	1.08195	1.07997	1.07408	1.07795	1.06199	1.05769	1.05091	1.02923	1.03376	1.02621	1.01511	0.994751	1.00129	1.01977	1.02166	1.00287		0.221541	0.220645	0.218575	0.216816	0.218602	0.215539	0.21564	0.214995	0.217057	0.220132	0.221134	0.224577	0.22385	0.223618	0.224747
	Kuwait	1.10192	1.12465	1.19021	1.19844	1.21944	1.24256	1.23047	1.224	1.24284	1.2212	1.20209	1.30604	1.22825	1.17423	1.1955	1.20715	1.17898	1.18424	1.22754	1.25967	1.24029	1.2424	1.25861	1.2256	1.22396	1.22269	1.19292	1.16825	1.16647	1.20657	1.19327	1.1624		0.157611	0.15119	0.117654	0.117707	0.117487	0.108606	0.118991	0.118893	0.115433	0.123379	0.138955	0.0851793	0.129961	0.169034	0.158146
	Israel	1.24848	1.26323	1.33678	1.39799	1.47916	1.50703	1.51861	1.49588	1.49265	1.48388	1.5011	1.52165	1.53806	1.57024	1.5658	1.58268	1.60335	1.6039	1.59349	1.58989	1.57312	1.59066	1.58807	1.55366	1.53924	1.51286	1.46768	1.43004	1.39638	1.40526	1.3809	1.36325		0.0683255	0.0680643	0.443742	0.743059	1.10416	1.17935	1.20263	1.1137	1.02887	1.06294	1.11931	1.20652	1.30531	1.38711	1.36116
	Iran (Islamic Republic of)	1.27242	1.28464	1.22438	1.4864	1.51717	1.61005	1.59789	1.34514	1.41636	1.3441	1.33217	1.33678	1.2584	1.32559	1.36936	1.40805	1.41326	1.3756	1.25649	1.31914	1.36885	1.32899	1.26186	1.19685	1.2273	1.14886	1.17428	1.16147	1.19158	1.14373	1.12976	1.20055		0.0887578	0.0884149	0.0874676	0.0930794	0.0948114	0.0948968	0.0946821	0.0900462	0.0934274	0.093627	0.0954253	0.0964969	0.0933374	0.0946473	0.0977931
	Oman	1.04349	1.06743	1.08272	1.09017	1.10742	1.11377	1.10879	1.10054	1.10393	1.0914	1.09926	1.10725	1.10733	1.12102	1.12257	1.13036	1.12189	1.11482	1.1105	1.11554	1.10121	1.09898	1.09297	1.07047	1.07634	1.06904	1.05774	1.037	1.04426	1.06373	1.06577	1.04619		0.193209	0.185508	0.180894	0.180369	0.181837	0.180936	0.187028	0.188041	0.193311	0.197813	0.197847	0.200108	0.199617	0.199287	0.199797
	Bahrain	0.987298	0.998968	1.00876	1.01719	1.03326	1.04194	1.04728	1.04218	1.05123	1.04225	1.04831	1.05459	1.05494	1.06776	1.0684	1.07485	1.07239	1.06829	1.0638	1.06837	1.05337	1.04991	1.04328	1.02181	1.02741	1.02044	1.02376	0.995943	0.996906	1.01539	1.01733	0.99864		0.227445	0.226576	0.224404	0.222606	0.22444	0.221279	0.221418	0.220728	0.222857	0.225996	0.22703	0.230554	0.229803	0.229576	0.230738
	Yemen	1.24848	1.26323	1.27561	1.28628	1.3066	1.31757	1.32432	1.31788	1.32932	1.31797	1.32562	1.33357	1.33401	1.35022	1.35103	1.35919	1.35608	1.35089	1.34521	1.351	1.33203	1.32766	1.31927	1.29211	1.2992	1.29039	1.27677	1.25173	1.26049	1.28399	1.21498	1.20569		0.0683255	0.0680643	0.0674118	0.0668716	0.0674227	0.0664732	0.0665149	0.0663076	0.066947	0.0678901	0.0682006	0.0692593	0.0690336	0.0689655	0.0693146
	Jordan	1.24848	1.26323	1.27561	1.28628	1.3066	1.31757	1.32432	1.3127	1.31875	1.29131	1.28876	1.30212	1.30201	1.31225	1.30514	1.31886	1.31721	1.31378	1.31442	1.31967	1.29824	1.29192	1.28761	1.26004	1.15519	1.13529	1.08311	1.0453	1.04204	1.03458	1.08929	1.18536		0.0683255	0.0680643	0.0674118	0.0668716	0.0674227	0.0664732	0.0665149	0.0661616	0.0666486	0.0807385	0.0870006	0.0874462	0.08554	0.0869837	0.0938373
	Syrian Arab Republic	0.399965	0.510404	0.621634	0.802506	0.78126	0.818557	0.88218	0.860349	0.821601	0.825111	0.848543	0.82627	0.796316	0.853996	0.955796	1.04101	1.05961	1.05971	1.0773	1.09	1.05296	1.03827	1.0346	1.034	1.01074	1.05283	1.03435	1.05238	1.08665	1.10425	1.06442	1.03523		0.0474155	0.0497949	0.0517344	0.0579056	0.0613485	0.0620968	0.0650111	0.0643138	0.068151	0.0820479	0.0846496	0.104122	0.099609	0.0990948	0.100462
North America	United States of America	1.12379	1.14125	1.11976	1.1306	1.15359	1.16827	1.1565	1.1662	1.17684	1.13685	1.11551	1.10597	1.11998	1.13966	1.13474	1.11501	1.11924	1.13557	1.13374	1.12325	1.12633	1.12356	1.10002	1.08746	1.0875	1.08627	1.05834	1.04346	1.03956	1.016	1.02907	0.972998		1.15637	1.18703	1.18978	1.20662	1.2391	1.24853	1.22685	1.24921	1.26302	1.2137	1.2075	1.20632	1.22107	1.2199	1.20895
	Saint Pierre and Miquelon	1.41719	1.44216	1.47239	1.49927	1.52702	1.54709	1.56093	1.55412	1.57273	1.53577	1.54784	1.55454	1.5524	1.56987	1.56176	1.56693	1.57815	1.56858	1.55041	1.55453	1.53069	1.51234	1.49987	1.47513	1.47364	1.46067	1.4393	1.40079	1.41277	1.4173	1.41715	1.37834		1.49665	1.54132	1.6048	1.64174	1.68655	1.69591	1.6947	1.70298	1.72245	1.67013	1.70622	1.72813	1.72354	1.71266	1.69817
	Canada	0.309075	0.291264	0.322767	0.312116	0.317393	0.295328	0.265903	0.297996	0.328279	0.362196	0.32499	0.31825	0.3285	0.296239	0.288264	0.305015	0.293075	0.327794	0.376003	0.363547	0.371805	0.393761	0.370738	0.378508	0.355383	0.336094	0.317546	0.327103	0.321887	0.291452	0.301412	0.270941		0.41987	0.416298	0.453824	0.451917	0.486107	0.43679	0.392678	0.430257	0.461991	0.475438	0.435995	0.452085	0.447654	0.404593	0.411513
	Greenland	1.41719	1.44216	1.47239	1.49927	1.52702	1.54709	1.56093	1.55412	1.57273	1.53577	1.54784	1.55454	1.5524	1.56987	1.56176	1.56693	1.57815	1.56858	1.55041	1.55453	1.53069	1.51234	1.49987	1.47513	1.47364	1.46067	1.4393	1.40079	1.41277	1.4173	1.41715	1.37834		1.49665	1.54132	1.6048	1.64174	1.68655	1.69591	1.6947	1.70298	1.72245	1.67013	1.70622	1.72813	1.72354	1.71266	1.69817
	Bermuda	1.41719	1.44216	1.47239	1.49927	1.52702	1.54709	1.56093	1.55412	1.57273	1.53577	1.54784	1.55454	1.5524	1.56987	1.56176	1.56693	1.57815	1.56858	1.55041	1.55453	1.53069	1.51234	1.49987	1.47513	1.47364	1.46067	1.4393	1.40079	1.41277	1.4173	1.41715	1.37834		1.49665	1.54132	1.6048	1.64174	1.68655	1.69591	1.6947	1.70298	1.72245	1.67013	1.70622	1.72813	1.72354	1.71266	1.69817
	Mexico	1.05281	0.981165	1.06094	1.13855	1.13161	1.12873	1.23145	1.25959	1.25003	1.20991	1.16021	1.13648	1.08731	1.10458	1.22382	1.10244	1.10424	1.16698	1.19149	1.13627	1.12213	1.13661	1.09478	1.03709	1.03759	1.02686	0.972385	0.955273	0.882411	0.950188	0.93099	0.910447		0.0767108	0.0735528	0.131081	0.179333	0.20205	0.217824	0.307869	0.327166	0.33874	0.321829	0.326738	0.337514	0.331382	0.380837	0.428144
REGIONS	North America	1.01205	1.01958	1.00651	1.01445	1.03129	1.03738	1.02515	1.0365	1.05337	1.03402	1.01487	1.00168	1.01138	1.02507	1.02184	1.00575	1.00811	1.0302	1.04095	1.02775	1.02946	1.03186	1.00849	0.99848	0.996195	0.990545	0.964023	0.950552	0.942467	0.922315	0.937496	0.882552		1.03164	1.05095	1.05537	1.06916	1.09892	1.09614	1.07237	1.0935	1.1135	1.08402	1.07959	1.07686	1.08595	1.08165	1.07143
	Africa	0.982876	1.07219	1.10066	1.12701	1.17241	1.17675	1.1618	1.18742	1.16973	1.15974	1.17278	1.17103	1.17175	1.20805	1.20008	1.19893	1.19398	1.19149	1.18323	1.14779	1.12974	1.11874	1.10559	1.09724	1.10555	1.09779	1.09112	1.06831	1.07078	1.07343	1.06579	1.02932		1.25162	1.33908	1.34841	1.31965	1.32959	1.27388	1.23622	1.26074	1.23871	1.25074	1.27345	1.27551	1.25918	1.29228	1.28158
	Central and South America	0.458717	0.472042	0.450481	0.428165	0.413613	0.397807	0.403667	0.390598	0.406016	0.40338	0.36989	0.363733	0.3644	0.360961	0.34499	0.372079	0.371669	0.375408	0.391224	0.409318	0.394941	0.395251	0.376255	0.369498	0.379147	0.365618	0.362413	0.365231	0.376368	0.35174	0.360844	0.347865		0.141568	0.161602	0.1476	0.12621	0.146084	0.14772	0.154517	0.143663	0.147384	0.169	0.154091	0.158034	0.136854	0.136885	0.135893
	Europe	0.933791	0.900595	0.903262	0.884756	0.850359	0.831871	0.835639	0.816171	0.781351	0.800252	0.800306	0.794113	0.773312	0.755628	0.752208	0.75435	0.748816	0.721336	0.717853	0.703631	0.701195	0.690153	0.690646	0.693631	0.672623	0.66398	0.655615	0.643001	0.61827	0.586145	0.560882	0.54731		1.26745	1.23499	1.25019	1.25701	1.21174	1.21696	1.23558	1.20615	1.19478	1.19663	1.18209	1.15723	1.18837	1.20581	1.20113
	Asia and Oceania	1.03889	1.05093	1.05316	1.05578	1.0895	1.11334	1.13613	1.15624	1.17445	1.17881	1.20263	1.23191	1.26227	1.27551	1.27629	1.28505	1.30176	1.29822	1.28708	1.31482	1.32264	1.32288	1.34362	1.35035	1.35399	1.35215	1.35865	1.36962	1.37115	1.3584	1.3451	1.36159		0.68919	0.705203	0.714342	0.715564	0.752741	0.796379	0.836937	0.860033	0.869636	0.894015	0.923963	0.951264	0.947811	0.934169	0.923195
	Eurasia	1.16462	1.17782	1.18735	1.19101	1.16986	1.16246	1.16973	1.15095	1.13358	1.13068	1.13711	1.13427	1.10894	1.07476	1.07496	1.07977	1.04779	1.02818	1.02831	1.00993	0.989025	0.964396	0.957848	0.940315	0.904853	0.906678	0.926358	0.895015	0.933869	0.908102	0.913619	0.911865		1.03182	1.02697	1.01713	1.00426	0.981407	0.955039	0.955921	0.943472	0.931973	0.950848	0.954565	0.967908	0.91525	0.918912	1.0084
	Middle East	1.12935	1.1437	1.15133	1.23436	1.2587	1.28444	1.28323	1.22353	1.24528	1.22257	1.22969	1.24404	1.2213	1.24693	1.26102	1.27207	1.27183	1.26257	1.23084	1.25226	1.25526	1.24797	1.22815	1.18996	1.19833	1.16416	1.15307	1.13192	1.14027	1.14145	1.13432	1.13186		0.110671	0.105354	0.141954	0.170418	0.198992	0.201342	0.203249	0.197428	0.191864	0.198106	0.20236	0.210644	0.22305	0.2285	0.226593
	World	1	1	1	1	1	1	1	1	1	1	1	1	1	1	1	1	1	1	1	1	1	1	1	1	1	1	1	1	1	1	1	1		1	1	1	1	1	1	1	1	1	1	1	1	1	1	1
[truncated: 273 more columns]

## Sheet: Table_S6
TIME DIFFERENTIATED NORMALISED IMPACT INTENSITIES (WORLD AS REFERENCE): RATIO SORTED ACROSS IMPACTS FOR EACH YEAR AND COUNTRY		Climate change																																Climate change	Human toxicity - cancer effects
		1980	1981	1982	1983	1984	1985	1986	1987	1988	1989	1990	1991	1992	1993	1994	1995	1996	1997	1998	1999	2000	2001	2002	2003	2004	2005	2006	2007	2008	2009	2010	2011		1980	1981	1982	1983	1984	1985	1986	1987	1988	1989	1990	1991	1992	1993	1994
		Smallest									Largest
Africa	Mali	0.246438	0.248964	0.210255	0.185635	0.242187	0.24472	0.275162	0.303167	0.386786	0.380073	0.312082	0.312587	0.288982	0.31566	0.23688	0.338218	0.430647	0.502665	0.485794	0.502663	0.495338	0.493603	0.487043	0.535439	0.529111	0.509685	0.507901	0.498547	0.48969	0.478964	0.472129	0.460843		0.0540109	0.054407	0.0493174	0.0450914	0.0498115	0.0479731	0.0533396	0.0609561	0.0690473	0.0683163	0.0644806	0.0645336	0.0613091	0.066026	0.0578919
	Democratic Republic of the Congo	0.0635336	0.0595244	0.0547945	0.0465922	0.0484664	0.0465735	0.0453702	0.0476614	0.0456016	0.0200111	0.0181128	0.0185477	0.0156952	0.0160973	0.0162139	0.0159547	0.01594	0.0163503	0.016459	0.0162135	0.0156941	0.01565	0.0155038	0.0172572	0.0168062	0.0165383	0.0143608	0.0166316	0.0185651	0.0170521	0.0170535	0.0167099		0.0319734	0.0317074	0.0312461	0.0307433	0.0310296	0.0305275	0.0305061	0.0304818	0.030706	0.0304108	0.0304918	0.0309746	0.0307908	0.0307664	0.0309253
	Swaziland	0.855652	0.918013	1.03671	1.18612	0.973707	0.839466	0.982162	0.861998	0.824413	0.819615	0.942441	0.849715	0.849992	0.86032	0.860534	0.865637	0.864053	0.840087	0.857129	0.860817	0.96263	0.959463	0.932509	1.10797	1.14875	0.992477	1.02826	0.960917	0.976527	0.907544	0.868935	0.819435		1.18226	1.24813	1.38097	1.55239	1.26737	1.0702	1.24442	1.0956	1.04945	1.0674	1.22398	1.11538	1.11175	1.11065	1.11446
	Chad	1.18167	1.1937	1.19701	1.22138	1.23439	1.24742	1.25678	1.23064	1.24013	1.21834	1.2081	1.20988	1.20727	1.22167	1.21902	1.23051	1.2266	1.21986	1.20981	1.2056	1.18802	1.18385	1.16798	1.13616	1.14827	1.13048	1.12074	1.10012	1.1029	1.10027	1.0982	1.08424		0.148407	0.150853	0.145879	0.137052	0.135618	0.127645	0.142341	0.161572	0.15876	0.155398	0.166854	0.165652	0.163249	0.172014	0.176867
	Sao Tome and Principe	NA	NA	NA	NA	NA	NA	NA	NA	NA	NA	NA	NA	NA	NA	1.66808	1.6785	1.6745	1.66604	1.65686	1.65953	0.825107	1.63128	1.61481	1.58253	1.58631	1.57176	1.55123	1.14319	1.02576	1.04409	1.0405	1.01777		NA	NA	NA	NA	NA	NA	NA	NA	NA	NA	NA	NA	NA	NA	2.04609
	Egypt	0.53991	0.589345	0.564206	0.650331	0.790629	0.903223	0.92159	0.933705	0.943208	0.947831	0.889089	0.926766	0.927401	0.891777	0.891229	0.901902	0.895209	0.907181	0.933707	0.869232	0.894653	0.893126	0.910447	0.893196	0.933668	0.929183	0.93044	0.905151	0.926204	0.966553	0.96952	0.930668		0.0798782	0.0837533	0.0803397	0.0875169	0.100227	0.108328	0.109571	0.110982	0.112242	0.115017	0.130022	0.143563	0.148023	0.156114	0.161485
	Congo	0.454004	0.429597	0.145821	0.0130115	0.013217	0.0133281	0.0133963	0.0133312	0.0134469	0.0133321	0.0134095	0.0134899	0.0134943	0.0136583	0.0136665	0.0137491	0.0137176	0.0136651	0.0136076	0.0136662	0.0134743	0.0134301	0.0133452	0.181366	0.216204	0.225943	0.188223	0.170835	0.205017	0.403585	0.246448	0.103226		0.0439524	0.0428851	0.0339426	0.0297646	0.0300099	0.0295873	0.0296059	0.0295136	0.0297982	0.030218	0.0303562	0.0308274	0.0307269	0.0306966	0.030852
	Ethiopia	0.340901	0.330058	0.302986	0.274195	0.24696	0.220822	0.180749	0.264667	0.251665	0.250539	0.134707	0.134498	0.111714	0.181897	0.0978363	0.0417792	0.0488119	0.0473059	0.0475078	0.0225437	0.0294568	0.0200676	0.0262751	0.01873	0.0182865	0.0175988	0.0129153	0.0657648	0.157967	0.146669	0.0183615	0.0823256		0.0404826	0.0398786	0.0385985	0.0373763	0.0367713	0.0354555	0.0343177	0.0366023	0.0365234	0.0370674	0.0338544	0.0343503	0.0335762	0.0355137	0.0332727
	Réunion	0.152196	0.053646	0.0129036	0.180659	0.334253	0.219373	0.289309	0.35638	0.729258	0.614762	0.630072	0.867668	0.886791	0.897774	0.910453	0.962948	0.745742	0.8258	0.669096	0.675317	0.666121	0.663888	0.663615	0.646828	0.663554	0.668606	0.673852	0.633212	0.504373	0.515707	0.512289	0.500036		0.21216	0.0828655	0.0300051	0.236486	0.424399	0.277564	0.359484	0.439243	0.887516	0.768717	0.786429	1.09204	1.10777	1.10784	1.12323
	Gambia	1.54786	1.56575	1.58054	1.5889	1.6184	1.63225	1.64128	1.63056	1.64639	1.63097	1.63916	1.65212	1.65093	1.67138	1.66808	1.6785	1.6745	1.66604	1.65686	1.65953	1.63674	1.63128	1.61481	1.58253	1.58631	1.57176	1.55123	1.52004	1.53227	1.55964	1.55424	1.52026		2.02965	2.02796	2.0058	1.97295	2.00195	1.97797	1.97589	1.96109	1.98647	2.01653	2.02364	2.06662	2.05018	2.05034	2.04609
	Libyan Arab Jamahiriya	1.24848	1.26323	1.27561	1.28628	1.3066	1.31757	1.32432	1.31788	1.32932	1.31797	1.32562	1.33357	1.33401	1.35022	1.35103	1.29443	1.28801	1.28819	1.28696	1.28626	1.27089	1.26642	1.26096	1.23709	1.24664	1.21375	1.16766	1.13409	1.15241	1.18126	1.16038	1.11405		0.0683255	0.0680643	0.0674118	0.0668716	0.0674227	0.0664732	0.0665149	0.0663076	0.066947	0.0678901	0.0682006	0.0692593	0.0690336	0.0689655	0.0693146
	Cape Verde	1.54786	1.56575	1.58054	1.5889	1.6184	1.63225	1.64128	1.63056	1.64639	1.63097	1.63916	1.65212	1.65093	1.67138	1.66808	1.6785	1.6745	1.66604	1.65686	1.65953	1.63674	1.63128	1.61481	1.58253	1.58631	1.57176	1.55123	1.52004	1.53227	1.55964	1.55424	1.52026		2.02965	2.02796	2.0058	1.97295	2.00195	1.97797	1.97589	1.96109	1.98647	2.01653	2.02364	2.06662	2.05018	2.05034	2.04609
	Burkina Faso	1.54786	1.56575	1.58054	1.5889	1.6184	1.63225	1.64128	1.63056	1.64639	1.63097	1.63916	1.55573	1.47856	1.32238	1.08904	0.997464	0.943758	0.99285	1.27344	1.07864	1.16547	1.37849	1.3479	1.25404	1.25159	1.2795	1.33587	1.23416	1.19169	1.255	1.2782	1.27641		2.02965	2.02796	2.0058	1.97295	2.00195	1.97797	1.97589	1.96109	1.98647	2.01653	2.02364	1.94687	1.83761	1.62515	1.34076
	Angola	0.5207	0.526855	0.510335	0.537298	0.545785	0.55037	0.523202	0.52797	0.532552	0.528005	0.522458	0.525591	0.477738	0.465878	0.466158	0.465577	0.464437	0.479667	0.42808	0.43871	0.484387	0.495867	0.45629	0.479388	0.278613	0.261946	0.247688	0.277049	0.2532	0.438499	0.414235	0.386453		0.0459985	0.0458226	0.0447411	0.045044	0.0454152	0.0447756	0.0439594	0.0440286	0.0444532	0.0450794	0.0450372	0.0457363	0.0441941	0.0436447	0.0438657
	Somalia	1.54786	1.56575	1.58054	1.5889	1.6184	1.63225	1.64128	1.63056	1.64639	1.63097	1.63916	1.65212	1.65093	1.67138	1.66808	1.6785	1.6745	1.66604	1.65686	1.65953	1.63674	1.63128	1.61481	1.5244	1.52805	1.51609	1.49629	1.46979	1.48162	1.55964	1.55424	1.52026		2.02965	2.02796	2.0058	1.97295	2.00195	1.97797	1.97589	1.96109	1.98647	2.01653	2.02364	2.06662	2.05018	2.05034	2.04609
	Namibia	NA	NA	NA	NA	NA	NA	NA	NA	NA	NA	NA	NA	NA	NA	NA	0.0551778	0.0666588	0.0853098	0.044189	0.0501619	0.0495285	0.0134301	0.0133452	0.0235484	0.0131422	0.0411962	0.105967	0.124219	0.112239	0.288783	0.245731	0.141638		NA	NA	NA	NA	NA	NA	NA	NA	NA	NA	NA	NA	NA	NA	NA
	Mozambique	0.0281473	0.0786152	0.0861331	0.0607142	0.312485	0.820993	1.20355	1.31497	1.22554	1.16203	0.537779	0.449184	0.314943	0.166247	0.0835411	0.0822434	0.0716242	0.0405434	0.0310844	0.0171144	0.0148403	0.0178573	0.0163926	0.0165658	0.017438	0.014859	0.0137089	0.0133142	0.0134215	0.0135977	0.0136309	0.0133831		0.0425382	0.0833461	0.0827948	0.0667916	0.258956	0.723763	0.896463	0.99992	0.994141	0.909844	0.326858	0.37049	0.267452	0.109521	0.0331693
	Ghana	0.0196245	0.0220755	0.0230459	0.042282	0.0816498	0.0473149	0.0340177	0.0131884	0.0133085	0.0132297	0.0133154	0.0134016	0.0134326	0.0179421	0.0180875	0.0159766	0.0178039	0.0195559	0.0109265	0.011999	0.0123941	0.011392	0.00936044	0.0087593	0.0115687	0.0109332	0.00875723	0.00693216	0.00961392	0.234595	0.169785	0.0937514		0.0306264	0.0305763	0.0303055	0.0306177	0.0319894	0.0305485	0.0301865	0.0291976	0.0294916	0.029986	0.0301431	0.0306256	0.0305864	0.0308193	0.0309792
	Sierra Leone	1.54786	1.56575	1.58054	1.5889	1.6184	1.63225	1.64128	1.63056	1.64639	1.63097	1.63916	1.65212	1.65093	1.67138	1.66808	1.6785	1.6745	1.66604	1.65686	1.65953	1.43383	1.49646	1.50042	1.45174	1.42899	1.34909	1.55123	1.14319	1.02576	0.70039	0.453363	0.330141		2.02965	2.02796	2.0058	1.97295	2.00195	1.97797	1.97589	1.96109	1.98647	2.01653	2.02364	2.06662	2.05018	2.05034	2.04609
	Cameroon	0.0817675	0.0726406	0.0724654	0.0678412	0.0606805	0.0573532	0.0414076	0.0464977	0.0445304	0.04276	0.0430083	0.0428251	0.0478571	0.0484387	0.0479579	0.0521903	0.0506209	0.0266478	0.0306795	0.0257142	0.0250069	0.0360242	0.0574101	0.0624	0.067125	0.0811346	0.165848	0.293987	0.283848	0.327544	0.304847	0.277333		0.0325328	0.0321036	0.0317695	0.0313625	0.0313829	0.0308324	0.0303945	0.030449	0.0306757	0.0310677	0.0312098	0.0316814	0.0317238	0.0316925	0.0318382
	Tunisia	1.14838	1.15964	1.16124	1.18962	1.12648	1.09187	1.19632	1.11077	1.1704	1.17233	1.13891	1.2101	1.17075	1.195	1.13124	1.11047	1.10106	1.10211	1.0892	1.09427	1.07737	1.07055	1.0638	1.0288	1.03423	1.02904	1.03857	1.0268	1.02128	1.01358	1.00559	0.986597		0.123246	0.124617	0.126791	0.116179	0.158566	0.173757	0.128341	0.162543	0.149317	0.146473	0.169062	0.1258	0.154819	0.149149	0.18976
	United Republic of Tanzania	0.364254	0.372655	0.373453	0.377769	0.375534	0.361191	0.388942	0.360852	0.300722	0.220209	0.19882	0.19345	0.189991	0.198191	0.254741	0.340626	0.252382	0.292647	0.319496	0.195572	0.277467	0.1248	0.106276	0.0950081	0.222999	0.65817	0.755004	0.392169	0.395041	0.346665	0.402815	0.436179		0.0445343	0.0445219	0.0439872	0.0436791	0.0437362	0.0424887	0.0434461	0.0423675	0.0404964	0.038194	0.0375341	0.037873	0.0376191	0.0598138	0.0842162
	Zimbabwe	0.185035	0.154544	0.216795	0.267136	0.406485	0.650392	0.803346	1.13447	1.12902	1.03078	1.00191	1.02744	1.09746	1.30151	1.32465	1.30252	1.19373	1.19666	1.20257	0.979436	0.881535	1.02598	0.909195	0.626116	0.695363	0.69024	0.786481	0.722401	0.727108	0.791572	0.79298	0.778328		0.266038	0.22105	0.299086	0.359694	0.536792	0.832231	1.02042	1.4382	1.43283	1.33904	1.30038	1.34588	1.43156	1.6734	1.71053
	Gabon	0.630553	0.385721	0.328581	0.317878	0.298768	0.292809	0.294309	0.292878	0.295419	0.254593	0.344755	0.349937	0.365462	0.401547	0.354773	0.385257	0.428838	0.426587	0.45034	0.443278	0.456947	0.424672	0.429679	0.460302	0.485405	0.561548	0.491631	0.621679	0.574076	0.570978	0.612876	0.646815		0.0493686	0.0415599	0.0393568	0.0386494	0.0382699	0.0374914	0.037515	0.037398	0.0377586	0.0544494	0.0684492	0.0711339	0.073212	0.0762227	0.0805385
	Guinea-Bissau	1.54786	1.56575	1.58054	1.5889	1.6184	1.63225	1.64128	1.63056	1.64639	1.63097	1.63916	1.65212	1.65093	1.67138	1.66808	1.6785	1.6745	1.66604	1.65686	1.65953	1.63674	1.63128	1.61481	1.58253	1.58631	1.57176	1.55123	1.52004	1.53227	1.55964	1.55424	1.52026		2.02965	2.02796	2.0058	1.97295	2.00195	1.97797	1.97589	1.96109	1.98647	2.01653	2.02364	2.06662	2.05018	2.05034	2.04609
	Algeria	0.984205	0.984234	0.989264	1.02468	1.01236	1.01157	1.0525	1.02731	1.06	1.04392	1.05447	1.04812	1.05524	1.05724	1.07001	1.07314	1.07541	1.07542	1.06321	1.06704	1.05967	1.05551	1.04726	1.01865	1.0251	1.00909	1.00904	0.98931	0.9947	1.01041	1.01902	1.0053		0.200874	0.198291	0.194293	0.199749	0.198648	0.196407	0.203355	0.200153	0.208025	0.210892	0.216723	0.220044	0.220798	0.220686	0.222947
	Liberia	0.951832	0.956355	0.945547	0.950563	1.1066	1.07013	0.985898	0.987817	0.984945	0.988064	1.63916	1.65212	1.65093	1.67138	1.66808	1.6785	1.6745	1.66604	1.65686	1.65953	1.63674	1.63128	1.61481	1.58253	1.58631	1.57176	1.55123	1.52004	1.53227	1.55964	1.55424	1.52026		1.25347	1.24406	1.20548	1.18583	1.37322	1.30145	1.19232	1.19341	1.19389	1.2271	2.02364	2.06662	2.05018	2.05034	2.04609
	Eritrea	NA	NA	NA	NA	NA	NA	NA	NA	NA	NA	NA	NA	NA	NA	1.35103	1.35919	1.35608	1.35089	1.34521	1.351	1.33203	1.32766	1.31927	1.29211	1.2992	1.29039	1.27677	1.25173	1.26049	1.28399	1.28646	1.26282		NA	NA	NA	NA	NA	NA	NA	NA	NA	NA	NA	NA	NA	NA	0.0693146
	Djibouti	1.54786	1.56575	1.58054	1.5889	1.6184	1.63225	1.64128	1.63056	1.64639	1.63097	1.63916	1.65212	1.65093	1.67138	1.66808	1.6785	1.6745	1.66604	1.65686	1.65953	1.63674	1.63128	1.61481	1.58253	1.58631	1.57176	1.55123	1.52004	1.53227	1.55964	1.55424	1.52026		2.02965	2.02796	2.0058	1.97295	2.00195	1.97797	1.97589	1.96109	1.98647	2.01653	2.02364	2.06662	2.05018	2.05034	2.04609
	Uganda	0.0126291	0.0127784	0.0129036	0.0130115	0.013217	0.0133281	0.0133963	0.0133312	0.0134469	0.0133321	0.0134095	0.0134899	0.0134943	0.0136583	0.0136665	0.0137491	0.0286796	0.0268841	0.0266493	0.0136662	0.0134743	0.0134301	0.0133452	0.0130705	0.0131422	0.0625359	0.369479	0.411439	0.396116	0.423542	0.452556	0.467535		0.0304118	0.0302955	0.0300051	0.0297646	0.0300099	0.0295873	0.0296059	0.0295136	0.0297982	0.030218	0.0303562	0.0308274	0.0307269	0.0306966	0.030852
	Kenya	0.159626	0.0801567	0.0567184	0.14381	0.156209	0.113194	-0.0202561	0.00969461	-0.0224674	-0.0629789	-0.0201822	-0.0473099	-0.0586835	-0.0592508	-0.0313441	0.0416753	0.0372616	0.131506	0.151379	0.346242	0.585666	0.342687	0.173927	0.116451	0.233046	0.257664	0.279335	0.262302	0.368208	0.475803	0.313346	0.174183		-0.113407	-0.0897936	-0.0856367	-0.0444404	-0.0531585	-0.0427185	-0.048706	-0.0483036	-0.0442766	-0.0500069	-0.0487941	-0.0498381	-0.0582402	-0.0535072	-0.0508312
	Côte d'Ivoire	0.274338	0.106899	0.131903	0.604631	1.00425	0.425896	0.557431	0.649023	0.606181	0.64961	0.553733	0.429207	0.509688	0.666103	0.701933	0.543469	0.499653	0.583455	0.722246	0.687223	0.659903	0.65642	0.695885	0.647209	0.688656	0.751017	0.729153	0.661878	0.657692	0.586929	0.685493	0.7614		0.0384405	0.0331383	0.0335303	0.0470063	0.0586769	0.0412553	0.0449231	0.0474429	0.0465319	0.0485908	0.0459391	0.0429303	0.045121	0.0493776	0.0506466
	Equatorial Guinea	1.54786	1.56575	1.58054	1.5889	1.6184	1.63225	1.64128	1.63056	1.64639	1.63097	1.63916	1.65212	1.65093	1.67138	1.66808	1.6785	1.6745	1.66604	1.65686	1.65953	1.63674	1.63128	1.61481	1.58253	1.58631	1.57176	1.55123	1.52004	1.53227	1.55964	1.55424	1.52026		2.02965	2.02796	2.0058	1.97295	2.00195	1.97797	1.97589	1.96109	1.98647	2.01653	2.02364	2.06662	2.05018	2.05034	2.04609
	Seychelles	1.54786	1.56575	1.58054	1.5889	1.6184	1.63225	1.64128	1.63056	1.64639	1.63097	1.63916	1.65212	1.65093	1.67138	1.66808	1.6785	1.6745	1.66604	1.65686	1.65953	1.63674	1.63128	1.61481	1.58253	1.58631	1.57176	1.55123	1.52004	1.53227	1.55964	1.55424	1.52026		2.02965	2.02796	2.0058	1.97295	2.00195	1.97797	1.97589	1.96109	1.98647	2.01653	2.02364	2.06662	2.05018	2.05034	2.04609
	Malawi	0.0519941	0.0924179	0.0875529	0.0480312	0.0473698	0.0470557	0.0453156	0.0422103	0.042095	0.0417117	0.0366345	0.0353383	0.0347597	0.327752	0.31447	0.310437	0.293256	0.286387	0.266416	0.285591	0.256964	0.25213	0.251063	0.218308	0.220713	0.219504	0.224057	0.199969	0.22854	0.209389	0.200777	0.189261		0.0816742	0.13274	0.124091	0.0729464	0.0719662	0.0701787	0.0677683	0.0640061	0.0641257	0.0650655	0.0588316	0.0579713	0.0569536	0.413366	0.397259
	Togo	0.321591	0.325392	0.373678	0.967963	0.659907	0.404602	0.304714	0.404696	0.491945	0.339491	0.482057	0.404626	0.5417	0.358577	0.536983	0.339917	0.44519	0.682277	0.536737	0.360382	0.590343	0.849756	0.573027	0.38926	0.693997	0.764429	0.708037	0.595752	0.324685	0.24408	0.244549	0.240055		0.0398902	0.0397377	0.0406927	0.0575949	0.0487163	0.0406531	0.0378079	0.0405518	0.0433068	0.039636	0.043872	0.0422146	0.0460496	0.0405724	0.0459026
	Rwanda	0.0126291	0.0127784	0.0129036	0.0130115	0.013217	0.0133281	0.0133963	0.0133312	0.0134469	0.0133321	0.0134095	0.0134899	0.0134943	0.0136583	0.0136665	0.0137491	0.0137176	0.0136651	0.0136076	0.0136662	0.0134743	0.0134301	0.0133452	0.0130705	0.0131422	0.705812	1.16665	1.21856	0.941346	0.95443	0.948756	0.926405		0.0304118	0.0302955	0.0300051	0.0297646	0.0300099	0.0295873	0.0296059	0.0295136	0.0297982	0.030218	0.0303562	0.0308274	0.0307269	0.0306966	0.030852
	Lesotho	NA	NA	NA	NA	NA	NA	NA	NA	NA	NA	NA	NA	NA	NA	NA	NA	NA	NA	NA	0.0136662	0.0134743	0.0134301	0.0133452	0.0130705	0.0131422	0.0130531	0.0129153	0.012662	0.0127506	0.0129884	0.0130133	0.0127742		NA	NA	NA	NA	NA	NA	NA	NA	NA	NA	NA	NA	NA	NA	NA
	Madagascar	1.02364	0.997588	0.759396	0.729323	0.764579	0.771123	0.740749	0.667106	0.646629	0.684805	0.681127	0.686498	0.674212	0.682562	0.681238	0.679649	0.61764	0.588404	0.561359	0.569412	0.512941	0.66429	0.627863	0.621637	0.677049	0.673046	0.693587	0.613058	0.686731	0.641709	0.649882	0.646174		1.34698	1.29711	0.970861	0.913029	0.953047	0.941598	0.899221	0.810365	0.788506	0.854723	0.849026	0.866957	0.845594	0.84564	0.844019
	Central African Republic	0.0126291	0.0127784	0.0129036	0.0130115	0.013217	0.244603	0.216882	0.215485	0.217565	0.215537	0.216628	0.218318	0.218173	0.220873	0.381315	0.346699	0.345875	0.34414	0.342258	0.342839	0.338127	0.337001	0.333639	0.326963	0.327776	0.296454	0.269302	0.228002	0.215353	0.219209	0.21851	0.213773		0.0304118	0.0302955	0.0300051	0.0297646	0.0300099	0.307928	0.272891	0.270961	0.274382	0.278507	0.279516	0.285302	0.283159	0.283152	0.478683
	Benin	NA	NA	NA	NA	NA	NA	NA	NA	NA	NA	1.32562	1.33357	1.33401	1.35022	1.35103	1.35919	1.35608	1.35089	1.34521	1.351	1.33203	1.32766	1.31927	1.29211	1.2992	1.29039	1.27677	1.25173	1.26049	1.28399	1.28646	1.26282		NA	NA	NA	NA	NA	NA	NA	NA	NA	NA	0.0682006	0.0692593	0.0690336	0.0689655	0.0693146
	South Africa	1.5201	1.5307	1.55563	1.57465	1.55184	1.5499	1.50814	1.53391	1.4867	1.47706	1.53346	1.52738	1.53782	1.58705	1.55883	1.56145	1.55217	1.53617	1.5215	1.54109	1.51505	1.52311	1.50546	1.48877	1.48899	1.49093	1.48221	1.45796	1.46673	1.47863	1.48232	1.4559		2.37625	2.35613	2.34863	2.33834	2.2896	2.23663	2.16853	2.20785	2.14403	2.1796	2.25845	2.27112	2.27853	2.3197	2.28587
	Nigeria	0.646409	0.753867	0.767032	0.831019	0.77315	0.784817	0.785899	0.785448	0.735414	0.74638	0.711137	0.63782	0.656414	0.687202	0.708831	0.709489	0.725676	0.717408	0.680444	0.678099	0.639083	0.660397	0.695386	0.652496	0.70921	0.703655	0.751698	0.737158	0.742729	0.810637	0.792552	0.778063		0.121559	0.143184	0.137236	0.158248	0.142236	0.136216	0.126195	0.13367	0.126555	0.135017	0.137219	0.127858	0.125188	0.129534	0.139358
	Guinea	0.93377	0.961815	0.970902	0.966837	1.08334	1.06915	1.08711	1.08002	1.10208	1.06975	1.07512	1.08361	1.08284	1.0746	1.07249	1.07022	1.06768	0.907573	0.87436	0.76802	0.747279	0.681674	0.657235	0.862426	0.672858	0.711784	0.717206	0.660996	0.709197	0.729333	0.735462	0.727667		1.22995	1.25109	1.23744	1.2059	1.34464	1.30027	1.31332	1.30353	1.33424	1.3274	1.33209	1.36033	1.34955	1.32327	1.32061
	Mauritius	1.26224	1.38087	1.24462	1.47895	1.39951	1.22752	1.30906	1.24831	1.40145	1.27711	1.45597	1.50506	1.44389	1.49313	1.54745	1.47239	1.53494	1.55252	1.54275	1.02423	0.820169	0.826197	0.845817	0.84735	0.844916	0.891008	0.931175	0.909789	0.90553	0.795788	0.747184	0.71911		1.6577	1.79014	1.58242	1.83738	1.73305	1.49088	1.57869	1.50454	1.69297	1.58202	1.79904	1.88392	1.79485	1.83317	1.89915
	Botswana	1.50635	1.52416	1.55197	1.57843	1.61331	1.64927	1.64494	1.64688	1.62622	1.62063	1.63413	1.6735	1.67708	1.69556	1.69817	1.71108	1.70587	1.69666	1.69309	1.69942	1.67395	1.67012	1.65657	1.61985	1.62024	1.62899	1.61154	1.57946	1.59354	1.62326	1.62637	1.59649		1.71146	1.70491	1.76781	1.83529	1.91017	2.01486	1.94139	1.99361	1.80787	1.88306	1.91621	2.12474	2.13609	2.12265	2.1429
	Morocco	0.939068	1.0934	1.21169	1.25978	1.29713	1.28055	1.30684	1.2983	1.28821	1.22055	1.23527	1.21648	1.25756	1.37968	1.33442	1.46965	1.31599	1.30905	1.37733	1.45998	1.49415	1.50549	1.49582	1.40985	1.41578	1.41872	1.3907	1.34859	1.33552	1.23495	1.16115	1.06453		0.459007	0.491695	0.439245	0.482358	0.441519	0.381167	0.6158	0.76047	0.660929	0.518239	0.543527	0.480457	0.427811	0.609105	0.608283
	Zambia	0.0376134	0.0314096	0.0283146	0.0300555	0.0308831	0.0279007	0.029755	0.030315	0.0310145	0.0289714	0.0232587	0.0254418	0.0235944	0.0239615	0.0213329	0.0228483	0.0219763	0.0231745	0.0252513	0.0211417	0.0208476	0.020663	0.0203452	0.019824	0.0196759	0.0208601	0.0195818	0.0152342	0.0153787	0.0167284	0.0164274	0.0158786		0.0528709	0.0436164	0.039946	0.0413501	0.0424119	0.0385614	0.0396347	0.0390017	0.0412874	0.0435001	0.0390812	0.0417554	0.0402324	0.040671	0.0353471
	Senegal	1.24848	1.26323	1.27561	1.28628	1.3066	1.31757	1.32432	1.31755	1.32079	1.30886	1.31885	1.32845	1.33124	1.33627	1.332	1.31233	1.31559	1.3302	1.32839	1.34618	1.33164	1.32766	1.17305	1.05597	1.10034	1.13313	1.14053	1.15964	1.1304	1.10494	1.10941	1.09112		0.0683255	0.0680643	0.0674118	0.0668716	0.0674227	0.0664732	0.0665149	0.0664954	0.0717272	0.0731123	0.0720787	0.0722236	0.0706301	0.0768988	0.0801812
	Mauritania	0.889412	0.800062	0.802309	0.818588	0.827332	0.877191	1.11863	0.98718	1.0171	0.999245	1.00898	1.02582	1.02361	1.03582	1.03358	1.06827	1.07499	1.01883	1.0769	1.02681	1.02785	1.03755	1.02943	0.991247	1.01068	1.00632	0.978712	0.967502	0.950785	0.931814	0.925195	0.908329		0.118908	0.110667	0.107254	0.101289	0.100416	0.0982274	0.129815	0.135161	0.135312	0.132638	0.144104	0.14491	0.142861	0.150273	0.154403
	Burundi	NA	NA	NA	0.0130115	0.013217	0.0133281	0.0133963	0.0133312	0.0134469	0.0133321	0.0134095	0.0134899	0.0134943	0.0136583	0.0136665	0.0137491	0.0137176	0.0136651	0.0136076	0.0136662	0.0134743	0.0134301	0.0133452	0.0130705	0.0131422	0.0130531	0.0129153	0.012662	0.0127506	0.0129884	0.0130133	0.0127742		NA	NA	NA	0.0297646	0.0300099	0.0295873	0.0296059	0.0295136	0.0297982	0.030218	0.0303562	0.0308274	0.0307269	0.0306966	0.030852
	Sudan	0.370846	0.292135	0.325456	0.328177	0.408416	0.375619	0.377543	0.375706	0.38645	0.380261	0.480773	0.49202	0.439736	0.464645	0.526323	0.637614	0.641052	0.679047	0.66957	0.667983	0.707451	0.723692	0.758957	0.83389	0.874412	0.856447	0.880901	0.881045	0.917597	0.512097	0.474321	0.432826		0.0414012	0.0387332	0.0392642	0.0389495	0.0414416	0.0398334	0.0398584	0.0397341	0.0403286	0.0408132	0.043835	0.044759	0.0430917	0.0436094	0.045596
Asia and Oceania	Afghanistan	0.372285	0.42042	0.397029	0.396832	0.41232	0.408633	0.598106	0.608875	0.500349	0.49026	0.49981	0.493167	0.495446	0.485835	0.492634	0.515498	0.537685	0.560212	0.55422	0.531363	0.515272	0.251113	0.304012	0.489454	0.551685	0.551745	0.558055	0.559048	0.4721	0.142879	0.132795	0.12246		0.449415	0.505448	0.465684	0.456711	0.476433	0.465294	0.673658	0.689424	0.569352	0.569791	0.573157	0.571078	0.56446	0.548669	0.557034
	Fiji	1.33962	1.35892	1.37902	1.21294	0.35652	0.35512	0.125041	0.0865773	0.125813	0.157463	0.14122	0.1708	0.14354	0.174573	0.220613	0.214444	0.214551	0.233108	0.240955	0.274706	0.263902	0.264161	0.307117	0.593808	0.581746	0.686806	0.728015	0.427169	0.457159	0.534921	0.678495	0.5664		0.841329	0.861667	0.910379	0.835558	0.278898	0.298742	0.118684	0.0902088	0.121483	0.150049	0.146665	0.177369	0.155558	0.185575	0.232153
	Philippines	0.866493	0.825341	0.809714	0.870672	0.733982	0.779657	0.755306	0.769973	0.755636	0.761086	0.766695	0.787831	0.820588	0.807661	0.835408	0.890938	0.911495	0.977053	0.986547	0.860971	0.906576	0.980905	0.928104	0.899459	0.910526	0.894185	0.840597	0.876438	0.843918	0.871653	0.988607	0.964636		0.110057	0.111777	0.151979	0.170231	0.223404	0.431701	0.402113	0.305556	0.319558	0.310134	0.264617	0.274451	0.261555	0.269384	0.20657
	Sri Lanka	0.141521	0.204105	0.291443	0.537298	0.106434	0.0455317	0.0133963	0.255464	0.104032	0.0364639	0.0134095	0.108918	0.138464	0.0716214	0.0974457	0.104966	0.378986	0.438902	0.413329	0.434225	0.684031	0.707891	0.806158	0.727843	0.819534	0.800787	0.697649	0.740804	0.685284	0.764715	0.602006	0.473591		0.0343659	0.0360743	0.0382566	0.045044	0.0327063	0.0304981	0.0296059	0.0363428	0.0323555	0.0308859	0.0303562	0.0336056	0.0343522	0.0323562	0.0332615
	Solomon Islands	1.33962	1.35892	1.37902	1.39755	1.42457	1.45645	1.47453	1.46997	1.48209	1.46901	1.48659	1.49873	1.50558	1.52729	1.52856	1.53893	1.53863	1.52967	1.52684	1.5359	1.52177	1.52162	1.51324	1.49034	1.50412	1.50363	1.49443	1.4679	1.47995	1.51022	1.51001	1.48396		0.841329	0.861667	0.910379	0.959526	1.05322	1.16602	1.22494	1.24674	1.24641	1.2583	1.33991	1.3798	1.40395	1.42769	1.45369
	China	1.43464	1.42049	1.41297	1.39438	1.45267	1.48894	1.53079	1.54217	1.55971	1.54264	1.55569	1.60591	1.62851	1.62937	1.6117	1.60335	1.62716	1.62771	1.61279	1.63009	1.6239	1.5813	1.5899	1.59193	1.57834	1.57282	1.573	1.57157	1.54105	1.5401	1.50883	1.50636		0.403799	0.398345	0.402269	0.400015	0.424298	0.447957	0.467638	0.476267	0.482338	0.492881	0.504188	0.528226	0.53692	0.526713	0.537176
	Indonesia	1.26975	1.26607	1.31967	1.30729	1.32776	1.3534	1.3871	1.42733	1.40764	1.36008	1.41427	1.42283	1.37781	1.37139	1.23359	1.16691	1.17894	1.27486	1.21714	1.26297	1.28927	1.28123	1.33901	1.34111	1.37351	1.37949	1.38966	1.35298	1.33767	1.32995	1.28056	1.317		0.0733018	0.0722851	0.0742926	0.0747981	0.0754787	0.245891	1.80215	2.00148	2.01435	2.2244	2.14119	2.15029	1.99776	1.70757	1.77416
	Samoa	1.33962	1.35892	1.03749	0.936036	0.954121	0.975409	0.743963	0.984421	0.992543	0.74117	0.750002	0.756111	0.908746	0.921835	0.922604	1.03053	0.885097	0.879956	0.95938	0.859349	0.956158	0.851311	0.695116	0.751706	0.758629	0.758343	0.753673	0.806428	0.813042	0.829658	0.829557	0.815237		0.841329	0.861667	0.690286	0.649605	0.712148	0.787209	0.627272	0.840995	0.840875	0.644258	0.685132	0.705312	0.85466	0.868895	0.884557
	Papua New Guinea	0.991006	1.01078	1.04582	1.01069	1.02419	1.05119	1.061	1.10152	1.09281	1.0814	1.09663	1.10558	1.11062	1.12662	1.12105	0.675997	0.699478	0.849414	0.905466	0.799072	0.860992	0.98172	1.01146	1.02639	1.06519	0.981018	0.974247	0.929266	0.929696	0.960521	0.960873	0.944715		0.628291	0.646657	0.695654	0.69974	0.762946	0.846884	0.886636	0.938851	0.923937	0.931294	0.993261	1.02272	1.04045	1.0579	1.07094
	Thailand	1.34785	1.17367	1.02461	1.07298	1.05408	1.08681	1.03614	1.06154	1.08144	1.06765	1.19376	1.2304	1.24996	1.2553	1.2463	1.21492	1.18419	1.18364	1.16259	1.13142	1.07055	1.03424	0.996316	0.959545	0.993122	0.980847	0.981368	0.956737	0.95554	0.989475	0.991849	0.988627		0.469887	0.506877	0.510911	0.45388	0.516921	0.986189	0.961321	0.999181	0.913386	0.928743	1.0933	1.14533	1.14238	0.953571	0.898681
	Mongolia	0	0	0	0	0	1.63536	1.64929	1.64303	1.65628	1.64446	1.64925	1.65908	1.66794	1.67727	1.68835	1.70311	1.69847	1.69199	1.68549	1.69503	1.67378	1.66729	1.6582	1.623	1.63114	1.62125	1.60359	1.56952	1.58068	1.61092	1.61279	1.58013		0	0	0	0	0	1.93317	1.96683	1.97106	1.98416	2.02599	2.00673	2.03752	2.081	2.01394	2.08426
	Burma	0.542482	0.44478	0.471546	0.473721	0.534531	0.604966	0.608171	0.636426	0.64994	0.588085	0.574544	0.606687	0.541409	0.545961	0.595642	0.652268	0.627759	0.672281	0.830593	0.867463	0.693422	0.683874	0.651326	0.658932	0.623677	0.56518	0.5356	0.502898	0.434094	0.289566	0.379783	0.445072		0.107601	0.104249	0.10778	0.109972	0.115927	0.134674	0.147618	0.136422	0.149882	0.150499	0.143067	0.151632	0.113246	0.116982	0.134179
	Australia	1.39574	1.39213	1.41787	1.46458	1.49255	1.50237	1.49771	1.51827	1.53784	1.52557	1.5586	1.57044	1.57914	1.58621	1.59737	1.60566	1.61737	1.60973	1.62362	1.61742	1.60196	1.60148	1.54362	1.51075	1.52279	1.524	1.50362	1.47796	1.48719	1.46987	1.43751	1.37164		4.26013	4.11774	4.0871	4.18484	4.22809	4.24784	4.21742	4.34932	4.42745	4.4907	4.60546	4.76959	4.80518	4.75505	4.8244
	Viet Nam	1.03242	1.03009	1.04269	1.03849	1.07083	1.09082	1.09222	1.09126	1.13142	0.783581	0.577005	0.470707	0.360726	0.36134	0.363752	0.40795	0.421484	0.551287	0.658067	0.55323	0.588614	0.52631	0.622212	0.663572	0.727691	0.717424	0.807966	0.792475	0.766273	0.7535	0.848539	0.857398		1.06272	0.999567	0.974633	0.889003	0.986097	0.986486	0.986523	1.00122	1.0784	0.770242	0.513449	0.35343	0.215876	0.163025	0.219637
	Pakistan	0.411833	0.43363	0.553386	0.534916	0.5339	0.607291	0.592666	0.591794	0.638238	0.65346	0.617159	0.628767	0.641865	0.688067	0.681151	0.681369	0.747779	0.771719	0.767022	0.859896	0.881409	0.839257	0.792464	0.694271	0.729776	0.70567	0.724841	0.743827	0.761373	0.78241	0.731582	0.699994		0.112378	0.111418	0.11555	0.102743	0.102999	0.110461	0.108078	0.1055	0.107908	0.108966	0.105294	0.103917	0.100544	0.100934	0.0973393
	Hong Kong Special Administrative Region (China)	1.24848	1.26323	1.34987	1.46867	1.54613	1.58881	1.62125	1.64905	1.67436	1.65597	1.66961	1.67341	1.67167	1.68909	1.70087	1.70805	1.60402	1.45247	1.48104	1.42996	1.43591	1.43708	1.44276	1.49843	1.45305	1.45095	1.42679	1.42457	1.40417	1.44641	1.39646	1.42498		0.0683255	0.0680643	0.524322	1.17088	1.50655	1.6597	1.80286	2.00628	2.09015	2.095	2.12868	2.12418	2.10346	2.0842	2.15904
	Japan	0.760501	0.769431	0.726517	0.73285	0.750046	0.718903	0.707786	0.69868	0.716772	0.726054	0.775204	0.770229	0.784782	0.754989	0.798563	0.771938	0.770431	0.747529	0.732056	0.766848	0.751413	0.754925	0.790144	0.816269	0.789428	0.781648	0.758786	0.806073	0.795291	0.771026	0.782325	0.881094		0.230288	0.24308	0.226832	0.24182	0.273689	0.282614	0.277274	0.279285	0.276852	0.280475	0.344999	0.355222	0.364848	0.37	0.391885
	India	1.3435	1.39821	1.49567	1.49047	1.55237	1.66429	1.69894	1.82334	1.7887	1.7966	1.74187	1.79404	1.83193	1.89276	1.84786	1.9347	1.9508	1.90432	1.85841	1.88191	1.90515	1.90137	1.92902	1.8535	1.85094	1.79875	1.77196	1.72745	1.79529	1.83298	1.81903	1.75925		1.24989	1.3008	1.36152	1.33515	1.38399	1.46284	1.49276	1.60983	1.58998	1.62819	1.57141	1.63463	1.65909	1.69916	1.65867
	Malaysia	1.62986	1.63568	1.70702	1.68118	1.50722	1.40649	1.36119	1.27697	1.25333	1.34205	1.48123	1.37984	1.31838	1.26635	1.1776	1.18204	1.20519	1.22932	1.12295	1.02906	0.986565	1.04987	1.12055	1.05201	1.11844	1.14585	1.13547	1.14251	1.1312	1.15439	1.22674	1.31078		0.0928891	0.0919823	0.0933798	0.0911604	0.083835	0.0813714	0.0803087	0.0776583	0.108873	0.328894	0.403994	0.415959	0.381748	0.332967	0.297319
	French Polynesia	1.33962	1.35892	1.37902	1.33162	1.26776	1.23998	1.25536	1.25147	1.16282	1.11965	1.14663	1.12742	1.05795	1.0732	1.08875	0.984317	0.937908	0.950024	0.839009	1.17772	1.08516	1.19375	1.13827	1.09464	1.08167	1.07414	1.03297	0.975357	1.01215	1.07624	1.13017	1.16709		0.841329	0.861667	0.910379	0.915251	0.939528	0.995555	1.04564	1.06415	0.981932	0.963558	1.0377	1.04255	0.991983	1.00859	1.04061
	Vanuatu	1.33962	1.35892	1.37902	1.39755	1.42457	1.45645	1.47453	1.46997	1.48209	1.46901	1.48659	1.49873	1.50558	1.52729	1.52856	1.53893	1.53863	1.52967	1.52684	1.5359	1.52177	1.52162	1.51324	1.49034	1.50412	1.50363	1.49443	1.4679	1.47995	1.51022	1.51001	1.48396		0.841329	0.861667	0.910379	0.959526	1.05322	1.16602	1.22494	1.24674	1.24641	1.2583	1.33991	1.3798	1.40395	1.42769	1.45369
	Republic of Korea (South)	0.794489	0.81135	0.872636	0.872199	0.983206	0.973093	0.996923	0.973539	0.948902	0.928264	0.92173	0.91777	0.768244	0.800572	0.772009	0.763504	0.828164	0.873609	0.881466	0.737934	0.759753	0.765721	0.742818	0.692789	0.679069	0.66142	0.664334	0.577208	0.596126	0.941404	0.945662	0.922575		1.48256	1.49947	1.55253	1.54857	1.55274	1.62384	1.54606	1.52701	1.49882	1.58715	1.51575	1.69573	1.41669	1.47244	1.42635
	Macao Special Administrative Region (China)	1.48253	1.50746	1.51739	1.53294	1.56358	1.57934	1.58654	1.57987	1.59219	1.57419	1.57275	1.58044	1.5741	1.59545	1.59426	1.59822	1.58562	1.58901	1.56787	1.56676	1.55232	1.54517	1.53375	1.48986	1.49414	1.48653	1.477	1.44508	1.45642	1.47425	1.48034	1.46611		1.74286	1.77252	1.73641	1.72047	1.76419	1.75565	1.76241	1.76537	1.77926	1.79609	1.77051	1.79565	1.75901	1.7659	1.76725
	Tonga	NA	1.35892	1.37902	1.39755	1.42457	1.45645	1.47453	1.46997	1.48209	1.46901	1.48659	1.49873	1.50558	1.52729	1.52856	1.53893	1.53863	1.52967	1.52684	1.5359	1.52177	1.52162	1.51324	1.49034	1.50412	1.50363	1.49443	1.4679	1.47995	1.51022	1.51001	1.48396		NA	0.861667	0.910379	0.959526	1.05322	1.16602	1.22494	1.24674	1.24641	1.2583	1.33991	1.3798	1.40395	1.42769	1.45369
	Kiribati	NA	NA	NA	NA	NA	NA	NA	NA	NA	NA	NA	NA	NA	NA	NA	NA	NA	1.52967	1.52684	1.5359	1.52177	1.52162	1.51324	1.49034	1.50412	1.50363	1.49443	1.4679	1.47995	1.51022	1.51001	1.48396		NA	NA	NA	NA	NA	NA	NA	NA	NA	NA	NA	NA	NA	NA	NA
	Brunei Darussalam	0.990344	1.0012	1.01064	1.01877	1.03472	1.04338	1.04977	1.04404	1.053	1.04493	1.05091	1.05723	1.05732	1.07031	1.07078	1.07702	1.07453	1.07052	1.06627	1.07093	1.05589	1.0525	1.04583	1.02392	1.02983	1.02284	1.01218	0.992414	0.999337	1.01814	1.02003	1.00127		0.22559	0.225235	0.223296	0.221692	0.223603	0.220471	0.220023	0.219691	0.221861	0.22446	0.225539	0.229029	0.228431	0.228123	0.229379
	Cook Islands	1.33962	1.35892	1.37902	1.39755	1.42457	1.45645	1.47453	1.46997	1.48209	1.46901	1.48659	1.49873	1.50558	1.52729	1.52856	1.53893	1.53863	1.52967	1.52684	1.5359	1.52177	1.52162	1.51324	1.49034	1.50412	1.50363	1.49443	1.4679	1.47995	0	0	0		0.841329	0.861667	0.910379	0.959526	1.05322	1.16602	1.22494	1.24674	1.24641	1.2583	1.33991	1.3798	1.40395	1.42769	1.45369
	Singapore	1.24848	1.26323	1.27561	1.28628	1.3066	1.31757	1.32432	1.31788	1.32932	1.31797	1.32562	1.33357	1.30096	1.25742	1.26305	1.27455	1.27916	1.28224	1.26558	1.28867	1.27317	1.24183	1.18971	1.11967	1.10533	1.07741	1.05949	1.03975	1.0412	0.976236	0.9858	0.960293		0.0683255	0.0680643	0.0674118	0.0668716	0.0674227	0.0664732	0.0665149	0.0663076	0.066947	0.0678901	0.0682006	0.0692593	0.0880723	0.121734	0.119563
	Nauru	1.33962	1.35892	1.37902	1.39755	1.42457	1.45645	1.47453	1.46997	1.48209	1.46901	1.48659	1.49873	1.50558	1.52729	1.52856	1.53893	1.53863	1.52967	1.52684	1.5359	1.52177	1.52162	1.51324	1.49034	1.50412	1.50363	1.49443	1.4679	1.47995	1.51022	1.51001	1.48396		0.841329	0.861667	0.910379	0.959526	1.05322	1.16602	1.22494	1.24674	1.24641	1.2583	1.33991	1.3798	1.40395	1.42769	1.45369
	Guam	1.33962	1.35892	1.37902	1.39755	1.42457	1.45645	1.47453	1.46997	1.48209	1.46901	1.48659	1.49873	1.50558	1.52729	1.52856	1.53893	1.53863	1.52967	1.52684	1.5359	1.52177	1.52162	1.51324	1.49034	1.50412	1.50363	1.49443	1.4679	1.47995	1.51022	1.51001	1.48396		0.841329	0.861667	0.910379	0.959526	1.05322	1.16602	1.22494	1.24674	1.24641	1.2583	1.33991	1.3798	1.40395	1.42769	1.45369
	Cambodia	0.00631456	0.00638919	0.00645181	0.0052046	0.00440568	0.00399842	0.0048714	0.00444373	0.00517187	0.00512772	0.0053638	0.00539597	0.00539773	0.00512186	0.00562738	1.02283	1.02049	1.13521	1.15498	1.21384	1.21737	1.25327	1.26904	1.2054	1.26297	1.22808	1.21482	1.20256	1.22379	1.22985	1.19634	1.10966		0.0152059	0.0151477	0.0150025	0.0119059	0.0100033	0.00887619	0.0107658	0.00983786	0.0114608	0.0116223	0.0121425	0.012331	0.0122908	0.0115112	0.0127038
	New Zealand	0.0922205	0.0948589	0.209751	0.182497	0.216126	0.240472	0.179017	0.187613	0.170653	0.21571	0.20431	0.234099	0.291738	0.246957	0.206053	0.178584	0.247066	0.314418	0.302136	0.295738	0.297602	0.397023	0.331338	0.387439	0.337641	0.424998	0.411057	0.361188	0.400787	0.310023	0.278917	0.251552		0.0747335	0.0601928	0.094167	0.0965421	0.124168	0.11237	0.0800915	0.0875884	0.0805627	0.0913951	0.100474	0.0966327	0.148495	0.112542	0.103268
	Lao People's Democratic Republic	0.0738749	0.0789149	0.0766532	0.0709136	0.0611663	0.0667149	0.0695802	0.0972529	0.106314	0.0811953	0.0867903	0.0823667	0.0836339	0.0839601	0.0675504	0.0581734	0.0523709	0.0661765	0.140486	0.159268	0.158407	0.156898	0.155078	0.150336	0.148187	0.141929	0.140765	0.123764	0.129411	0.162258	0.175149	0.186184		0.101764	0.107385	0.10231	0.0941726	0.0836445	0.0884305	0.0914918	0.122506	0.132708	0.106995	0.112246	0.108402	0.108402	0.107817	0.0900475
	Maldives	NA	NA	NA	NA	NA	1.45645	1.47453	1.46997	1.48209	1.46901	1.48659	1.49873	1.50558	1.52729	1.52856	1.53893	1.53863	1.52967	1.52684	1.5359	1.52177	1.52162	1.51324	1.49034	1.50412	1.50363	1.49443	1.4679	1.47995	1.51022	1.51001	1.48396		NA	NA	NA	NA	NA	1.16602	1.22494	1.24674	1.24641	1.2583	1.33991	1.3798	1.40395	1.42769	1.45369
	Nepal	0.198006	0.175881	0.177605	0.0901793	0.0871244	0.0878564	0.0716598	0.0599223	0.0596178	0.0607734	0.0428974	0.0421874	0.0595588	0.073061	0.0826028	0.0915847	0.0475586	0.0508102	0.122755	0.111737	0.0608476	0.0276379	0.0195639	0.0130705	0.0185458	0.0130531	0.0129153	0.012662	0.0172389	0.017115	0.0130133	0.0127742		0.0360988	0.0352218	0.0348842	0.0320135	0.0321478	0.0316951	0.0312463	0.0308276	0.0311016	0.0315879	0.0312066	0.0316629	0.0320632	0.0323974	0.0328346
	New Caledonia	1.06612	1.0572	0.778529	0.855773	0.791896	0.816575	0.931823	1.08256	0.800221	0.817784	0.878399	1.04379	1.04855	1.06365	1.06533	1.13092	1.12473	1.1612	1.14349	1.07823	1.10334	1.18852	1.22972	1.20557	1.19477	1.21073	1.23523	1.13242	1.08457	1.15867	1.15311	1.12859		0.674193	0.675325	0.523402	0.595706	0.594538	0.66213	0.780957	0.923007	0.681556	0.708893	0.799267	0.966599	0.983323	0.999785	1.01861
	Bangladesh	0.830961	0.903692	0.881883	0.881572	0.861932	0.932937	1.02729	0.989701	0.979207	0.931652	0.941936	0.957029	0.977244	1.01896	0.999789	1.03731	1.01922	1.02787	1.01468	1.03099	1.0064	1.0066	1.00035	0.979716	0.990541	0.985659	0.982413	0.962797	0.9769	1.00074	1.00196	0.982608		0.138361	0.148074	0.148907	0.158002	0.152626	0.160664	0.161014	0.179978	0.184311	0.1877	0.197705	0.208033	0.205387	0.205823	0.203266
	American Samoa	1.33962	1.35892	1.37902	1.39755	1.42457	1.45645	1.47453	1.46997	1.48209	1.46901	1.48659	1.49873	1.50558	1.52729	1.52856	1.53893	1.53863	1.52967	1.52684	1.5359	1.52177	1.52162	1.51324	1.49034	1.50412	1.50363	1.49443	1.4679	1.47995	1.51022	1.51001	1.48396		0.841329	0.861667	0.910379	0.959526	1.05322	1.16602	1.22494	1.24674	1.24641	1.2583	1.33991	1.3798	1.40395	1.42769	1.45369
	Bhutan	1.48253	1.50746	1.51739	1.53294	1.56358	0.0133281	0.0133963	0.0133312	0.0134469	0.0133321	0.0134095	0.0134899	0.0134943	0.0136583	0.0136665	0.0137491	0.0137176	0.0136651	0.0136076	0.0136662	0.0134743	0.0134301	0.0133452	0.0130705	0.0131422	0.0130531	0.0129153	0.012662	0.0127506	0.0129884	0.0130133	0.0127742		1.74286	1.77252	1.73641	1.72047	1.76419	0.0295873	0.0296059	0.0295136	0.0297982	0.030218	0.0303562	0.0308274	0.0307269	0.0306966	0.030852
Central and South America	Uruguay	0.396693	0.365471	0.400038	0.0375988	0.0349241	0.0413333	0.0348576	0.0639764	0.298167	0.417093	0.0850173	0.16766	0.146757	0.117784	0.0385312	0.0966127	0.180483	0.131432	0.127822	0.310213	0.0966584	0.0163121	0.0174822	0.0191037	0.239347	0.166029	0.444964	0.168679	0.535664	0.204567	-0.0273119	-0.102641		0.0421942	0.0409482	0.0414736	0.0304812	0.0306378	0.0303793	0.0302101	0.030942	0.0378362	0.0418768	0.0324213	0.0353158	0.0345927	0.033678	0.0315671
	Falkland Islands (Malvinas)	NA	NA	NA	NA	NA	NA	NA	NA	1.28561	1.27849	1.28107	1.28167	1.28209	1.29742	1.30773	1.31035	1.30745	1.30467	1.29405	1.29745	1.26658	1.25066	1.23277	1.19737	1.19517	1.19649	1.17849	1.15719	1.15316	1.17665	1.17152	1.15321		NA	NA	NA	NA	NA	NA	NA	NA	0.334822	0.355781	0.376614	0.380785	0.363104	0.388589	0.40394
	Peru	0.377963	0.32143	0.312515	0.296173	0.329676	0.273647	0.275819	0.287413	0.29782	0.305469	0.284397	0.240309	0.333446	0.271686	0.175476	0.316962	0.30862	0.354027	0.336293	0.304072	0.236283	0.182008	0.219766	0.227228	0.345089	0.300625	0.269077	0.301181	0.381185	0.365091	0.358487	0.361375		0.0251228	0.0261289	0.0123224	0.0109535	0.0147059	0.00948808	0.0126933	0.0184886	0.0182057	0.0187097	0.0228818	0.0225514	0.0241554	0.0264302	0.0219356
	Martinique	1.19876	1.2183	1.22545	1.23544	1.25713	1.27035	1.28491	1.28127	1.28561	1.27849	1.28107	1.28167	1.28209	1.29742	1.30773	1.31035	1.30745	1.30467	1.29405	1.29745	1.26658	1.25066	1.23277	1.19737	1.19517	1.19649	1.17849	1.15719	1.15316	1.17665	1.17152	1.15321		0.22632	0.242478	0.243762	0.244126	0.285491	0.305857	0.321747	0.319657	0.334822	0.355781	0.376614	0.380785	0.363104	0.388589	0.40394
	Ecuador	0.909301	0.986929	0.987457	0.756526	0.312173	0.274177	0.245777	0.204665	0.195276	0.18976	0.282202	0.359041	0.404548	0.288724	0.264736	0.51932	0.428683	0.429944	0.477243	0.405276	0.372733	0.471084	0.468522	0.460028	0.505999	0.519909	0.451769	0.380937	0.386315	0.505512	0.527129	0.490889		0.0579201	0.0597187	0.0588754	0.0514329	0.0386576	0.0369645	0.0361485	0.03491	0.0349315	0.0353124	0.0381082	0.0408875	0.042071	0.0385724	0.0380728
	Trinidad and Tobago	0.962268	0.987922	0.998969	1.00739	1.02476	1.0317	1.02921	1.02359	1.03209	1.02299	1.02951	1.03644	1.0379	1.04984	1.04288	1.05058	1.06473	1.06134	1.05778	1.06226	1.04727	1.03799	1.03146	1.01692	1.01745	1.01154	1.00078	0.986309	0.993313	1.01197	1.01035	0.988906		0.2027	0.215309	0.214974	0.214422	0.215749	0.213742	0.20739	0.208392	0.210545	0.213319	0.214676	0.218512	0.218542	0.217886	0.214401
	El Salvador	0.103557	0.11463	0.0922636	0.121989	0.0837122	0.125712	0.0887267	0.260311	0.186305	0.129749	0.107192	0.470803	0.42837	0.498068	0.616433	0.590264	0.433334	0.626614	0.622164	0.498118	0.648446	0.611915	0.634481	0.542396	0.573333	0.520008	0.515424	0.522968	0.457612	0.515964	0.398637	0.283663		0.115701	0.142219	0.148428	0.122349	0.114193	0.072921	0.0649471	0.0842259	0.0716424	0.0715308	0.0696587	0.0945465	0.0754317	0.0794719	0.086582
	Costa Rica	0.0263195	0.0415419	0.0458146	0.0411276	0.0276051	0.029033	0.0329685	0.0363306	0.0404416	0.021239	0.0441045	0.0736371	0.19107	0.154349	0.22536	0.235882	0.140432	0.0587645	0.112404	0.0508809	0.0315994	0.0392763	0.0306071	-0.0333787	-0.0191825	0.0537564	0.081221	0.101159	0.0914325	0.0545534	0.0733152	0.0893017		0.0224216	0.0235054	0.0237366	0.0244964	0.0245729	0.0237849	0.0241847	0.0244437	0.0248983	0.0304463	0.0312414	0.0278125	0.0358782	0.0347249	0.0554398
	Bolivia	0.273089	0.308022	0.277576	0.268489	0.195803	0.210022	0.230557	0.215852	0.304314	0.351139	0.418016	0.389397	0.410291	0.413722	0.504007	0.565807	0.539334	0.528504	0.578651	0.531046	0.485724	0.443117	0.451535	0.512669	0.500541	0.574122	0.559819	0.554679	0.565692	0.59995	0.621554	0.625421		0.0216205	0.0462601	0.0454296	0.0244078	0.0202444	0.0238547	0.0276884	0.0196533	0.0432726	0.0551789	0.0714985	0.0716099	0.0709533	0.0773084	0.0978922
	Cuba	0.949862	0.980901	0.977017	0.995202	1.02661	1.03506	1.03573	1.04034	1.04216	1.04443	1.04634	0.983615	0.95147	1.07453	1.082	1.15314	1.09927	1.12007	1.13844	1.10305	1.07168	1.07607	1.0565	1.06011	1.04645	1.12373	1.12554	1.1025	1.0857	1.09888	1.1204	1.12655		-0.0973311	-0.0885936	-0.0966095	-0.0890053	-0.0807556	-0.0808603	-0.0831693	-0.0790428	-0.0824687	-0.077356	-0.0786765	-0.117325	-0.135947	-0.0747403	-0.0730348
	Colombia	0.289402	0.295599	0.323363	0.349553	0.344517	0.332126	0.281067	0.369441	0.30106	0.266505	0.300727	0.324138	0.414857	0.335785	0.27192	0.320531	0.216855	0.34299	0.347756	0.24852	0.278617	0.27559	0.255305	0.241666	0.203726	0.210827	0.204374	0.1926	0.16223	0.299032	0.306536	0.26931		0.194677	0.19244	0.208167	0.195682	0.233489	0.253882	0.214342	0.276718	0.231424	0.227435	0.252685	0.270408	0.349041	0.273603	0.218805
	Montserrat	1.19876	1.2183	1.22545	1.23544	1.25713	1.27035	1.28491	1.28127	1.28561	1.27849	1.28107	1.28167	1.28209	1.29742	1.30773	1.31035	1.30745	1.30467	1.29405	1.29745	1.26658	1.25066	1.23277	1.19737	1.19517	1.19649	1.17849	1.15719	1.15316	1.17665	1.17152	1.15321		0.22632	0.242478	0.243762	0.244126	0.285491	0.305857	0.321747	0.319657	0.334822	0.355781	0.376614	0.380785	0.363104	0.388589	0.40394
	Jamaica	1.07356	1.10016	1.09078	1.11396	1.16377	1.17791	1.15707	1.13062	1.11959	1.11219	1.14024	1.19336	1.14196	1.20164	1.22445	1.26562	1.25756	1.25593	1.26907	1.27601	1.2595	1.27255	1.29031	1.25521	1.25336	1.24115	1.22482	1.20612	1.20679	1.22067	1.17082	1.05045		0.0105807	0.0218784	0.0125675	0.0182369	0.0172578	0.0200163	0.0205306	0.00524698	-0.0132686	-0.00585912	-0.00447925	0.0293972	-0.00419809	0.00393384	0.0173208
	Netherlands Antilles	1.19876	1.2183	1.22545	1.23544	1.25713	1.27035	1.28491	1.28127	1.28561	1.27849	1.28107	1.28167	1.28209	1.29742	1.30773	1.31035	1.30745	1.30467	1.29405	1.29745	1.23224	1.21579	1.19841	1.16663	1.16502	1.16732	1.14902	1.12921	1.12482	1.12286	1.11756	1.09966		0.22632	0.242478	0.243762	0.244126	0.285491	0.305857	0.321747	0.319657	0.334822	0.355781	0.376614	0.380785	0.363104	0.388589	0.40394
	Saint Lucia	1.19876	1.2183	1.22545	1.23544	1.25713	1.27035	1.28491	1.28127	1.28561	1.27849	1.28107	1.28167	1.28209	1.29742	1.30773	1.31035	1.30745	1.30467	1.29405	1.29745	1.26658	1.25066	1.23277	1.19737	1.19517	1.19649	1.17849	1.15719	1.15316	1.17665	1.17152	1.15321		0.22632	0.242478	0.243762	0.244126	0.285491	0.305857	0.321747	0.319657	0.334822	0.355781	0.376614	0.380785	0.363104	0.388589	0.40394
	Chile	0.501414	0.497642	0.372671	0.362813	0.407934	0.34655	0.298249	0.28335	0.438609	0.6545	0.567092	0.474743	0.187282	0.200959	0.309892	0.351942	0.473327	0.563561	0.693508	0.794526	0.572308	0.41643	0.4195	0.476116	0.524381	0.461978	0.492799	0.632742	0.624076	0.541338	0.696405	0.679821		0.599277	0.60365	0.369308	0.415151	0.572098	0.474198	0.405213	0.388059	0.692968	1.05915	0.910004	0.750613	0.313711	0.323807	0.511792
	United States Virgin Islands	1.19876	1.2183	1.22545	1.23544	1.25713	1.27035	1.28491	1.28127	1.28561	1.27849	1.28107	1.28167	1.28209	1.29742	1.30773	1.31035	1.30745	1.30467	1.29405	1.29745	1.26658	1.25066	1.23277	1.19737	1.19517	1.19649	1.17849	1.15719	1.15316	1.17665	1.17152	1.15321		0.22632	0.242478	0.243762	0.244126	0.285491	0.305857	0.321747	0.319657	0.334822	0.355781	0.376614	0.380785	0.363104	0.388589	0.40394
	Bahamas	1.19876	1.2183	1.22545	1.23544	1.25713	1.27035	1.28491	1.28127	1.28561	1.27849	1.28107	1.28167	1.28209	1.29742	1.30773	1.31035	1.30745	1.30467	1.29405	1.29745	1.26658	1.25066	1.23277	1.19737	1.19517	1.19649	1.17849	1.15719	1.15316	1.17665	1.17152	1.15321		0.22632	0.242478	0.243762	0.244126	0.285491	0.305857	0.321747	0.319657	0.334822	0.355781	0.376614	0.380785	0.363104	0.388589	0.40394
	Haiti	0.274611	0.300366	0.455147	0.467822	0.501315	0.492236	0.522502	0.534209	0.566102	0.56127	0.528973	0.558518	0.561632	0.598404	0.600802	0.72455	0.783924	0.880384	0.711114	0.694949	0.622039	0.682071	0.691421	0.665132	0.680904	0.663773	0.668249	0.829319	0.78912	0.910169	0.892847	0.846138		-0.0212629	-0.016784	-1.11627e-06	0.0022463	0.00570092	0.00827569	0.0122327	0.0131609	0.0151381	0.0153514	0.0163851	0.0159181	0.0466278	0.0474392	0.047738
	Argentina	0.615933	0.617315	0.575133	0.559811	0.512016	0.468444	0.524254	0.532109	0.695944	0.709884	0.514834	0.59059	0.5929	0.555217	0.497658	0.55566	0.623217	0.539763	0.582339	0.693912	0.630075	0.522538	0.499571	0.531949	0.614836	0.609765	0.596776	0.659147	0.687736	0.626821	0.673069	0.696794		0.125161	0.131668	0.124169	0.12864	0.11296	0.118818	0.133789	0.127078	0.180628	0.168415	0.137483	0.152622	0.147171	0.150339	0.18177
	Antigua and Barbuda	1.19876	1.2183	1.22545	1.23544	1.25713	1.27035	1.28491	1.28127	1.28561	1.27849	1.28107	1.28167	1.28209	1.29742	1.30773	1.31035	1.30745	1.30467	1.29405	1.29745	1.26658	1.25066	1.23277	1.19737	1.19517	1.19649	1.17849	1.15719	1.15316	1.17665	1.17152	1.15321		0.22632	0.242478	0.243762	0.244126	0.285491	0.305857	0.321747	0.319657	0.334822	0.355781	0.376614	0.380785	0.363104	0.388589	0.40394
	Grenada	1.19876	1.2183	1.22545	1.23544	1.25713	1.27035	1.28491	1.28127	1.28561	1.27849	1.28107	1.28167	1.28209	1.29742	1.30773	1.31035	1.30745	1.30467	1.29405	1.29745	1.26658	1.25066	1.23277	1.19737	1.19517	1.19649	1.17849	1.15719	1.15316	1.17665	1.17152	1.15321		0.22632	0.242478	0.243762	0.244126	0.285491	0.305857	0.321747	0.319657	0.334822	0.355781	0.376614	0.380785	0.363104	0.388589	0.40394
	Dominican Republic	0.95696	0.923981	0.907168	0.917603	1.04188	1.02144	1.04981	1.05995	1.08961	1.05436	1.16313	1.16047	1.17002	1.07856	1.18586	1.19784	1.17025	1.21582	1.22977	1.19735	1.20578	1.23791	1.21264	1.17667	1.08886	1.04784	1.08341	1.05559	1.11894	1.15808	1.14265	1.09541		0.0201964	0.0234055	0.0131252	0.0107849	0.00398885	0.329872	0.0832047	0.339871	0.254926	0.0593331	0.0771123	0.313928	0.222907	0.262467	0.105886
	Saint Vincent and the Grenadines	0.0126291	0.61554	0.619176	0.624226	0.427854	0.432336	0.437235	0.330315	0.331487	0.329622	0.647242	0.964629	0.77465	0.783916	0.876377	0.878147	0.93781	0.935811	0.928207	0.930652	0.953304	1.09601	0.961785	0.960508	0.958763	0.981323	0.984227	0.98111	0.963095	0.982705	0.993289	0.990287		0.0304118	0.136387	0.136884	0.136945	0.11517	0.121677	0.126986	0.102049	0.106054	0.111609	0.203485	0.293295	0.230153	0.245432	0.279577
	Barbados	1.19876	1.2183	1.22545	1.23544	1.25713	1.27035	1.28491	1.28127	1.28561	1.27849	1.28107	1.28167	1.28209	1.29742	1.30773	1.31035	1.30745	1.30467	1.29405	1.29745	1.26658	1.25066	1.23277	1.19737	1.19517	1.19649	1.17849	1.15719	1.15316	1.17665	1.17152	1.15321		0.22632	0.242478	0.243762	0.244126	0.285491	0.305857	0.321747	0.319657	0.334822	0.355781	0.376614	0.380785	0.363104	0.388589	0.40394
	Venezuela (Bolivarian Republic of)	0.626096	0.678913	0.682238	0.651753	0.624826	0.609372	0.558786	0.480474	0.462954	0.452193	0.421407	0.32592	0.332168	0.351573	0.307388	0.328849	0.313485	0.293879	0.316522	0.282368	0.300443	0.371261	0.377899	0.387127	0.329488	0.298936	0.292527	0.303135	0.30047	0.317982	0.393122	0.375873		0.0908848	0.0913717	0.0937489	0.0951612	0.10291	0.100922	0.0980616	0.0883551	0.0878753	0.0818816	0.0843445	0.0794954	0.0775058	0.0816802	0.0793401
	Nicaragua	0.566744	0.610229	0.663612	0.82432	0.617647	0.625343	0.686561	0.695171	0.67413	0.436701	0.581884	0.616531	0.734648	0.642186	0.768503	0.815594	0.838036	0.883554	1.02752	0.992868	1.08605	1.07311	0.969145	0.864928	0.87907	0.784125	0.837193	0.805561	0.756784	0.788111	0.708927	0.62524		-0.00377044	-0.000773911	-0.00219584	0.0836597	0.135182	0.128264	0.108738	0.094358	0.0964886	0.126786	0.130852	0.140196	0.138233	0.118609	0.113585
	Suriname	0.512051	0.463699	0.246085	0.424296	0.307232	0.238948	0.462811	0.66651	0.591702	0.251144	0.292296	0.22612	0.221217	0.233732	0.234246	0.268145	0.124609	0.124323	0.122581	0.121396	0.626505	0.618883	0.601738	0.580546	0.575623	0.553831	0.535929	0.526233	0.521215	0.535143	0.532857	0.524506		0.112899	0.109662	0.0711122	0.101886	0.0903965	0.0791742	0.132863	0.178981	0.168445	0.091414	0.106533	0.0895029	0.0851512	0.0920496	0.0944465
	Guatemala	0.560304	0.901122	0.776545	0.544583	0.707976	0.675835	0.0261357	0.112696	0.118698	0.0570594	-0.172577	-0.128521	-0.00920257	-0.00388601	0.00869066	0.129988	0.0751483	0.0268135	0.324227	0.227843	0.35927	0.402849	0.51966	0.450475	0.285379	0.245056	0.304232	0.367991	0.314426	0.0104325	-0.10142	-0.244369		-0.232083	0.00238764	-0.014067	-0.00953232	-0.00654976	-0.00513588	-0.0171674	-0.0200994	-0.0233331	-0.029113	-0.200224	-0.217994	-0.236656	-0.225501	-0.221533
	Honduras	0.17926	0.206148	0.245831	0.289287	0.226687	0.228592	0.151875	0.175136	0.124843	0.124783	0.118855	0.118166	0.11464	0.123212	0.210151	0.3769	0.447612	0.444744	0.57853	0.439181	0.499061	0.665258	0.779396	0.761867	0.878303	0.798879	0.74926	0.722091	0.713547	0.651591	0.642205	0.625916		0.0355237	0.036136	0.0369053	0.0378161	0.0361848	0.0356753	0.0335047	0.0340772	0.0329431	0.0334362	0.0333972	0.0338749	0.0336611	0.0338334	0.0365029
	Dominica	NA	0.0127784	0.0129036	0.0130115	0.013217	0.641841	0.649154	0.647299	0.649528	0.645911	0.647242	0.647582	0.647791	0.65554	0.6607	0.878147	0.876203	0.788267	0.781871	0.655556	0.729535	0.897165	0.710158	0.802602	0.688586	0.858368	0.845468	0.871059	0.868061	0.885733	0.823969	0.773062		NA	0.0302955	0.0300051	0.0297646	0.0300099	0.167722	0.175676	0.174585	0.18231	0.192999	0.203485	0.205806	0.196915	0.209643	0.217396
	Cayman Islands	1.19876	1.2183	1.22545	1.23544	1.25713	1.27035	1.28491	1.28127	1.28561	1.27849	1.28107	1.28167	1.28209	1.29742	1.30773	1.31035	1.30745	1.30467	1.29405	1.29745	1.26658	1.25066	1.23277	1.19737	1.19517	1.19649	1.17849	1.15719	1.15316	1.17665	1.17152	1.15321		0.22632	0.242478	0.243762	0.244126	0.285491	0.305857	0.321747	0.319657	0.334822	0.355781	0.376614	0.380785	0.363104	0.388589	0.40394
	Brazil	0.250551	0.260727	0.251019	0.231606	0.235763	0.241303	0.283926	0.258519	0.254286	0.253147	0.241967	0.246866	0.242171	0.247235	0.239117	0.244887	0.245215	0.249332	0.247298	0.273405	0.275798	0.281465	0.250874	0.227889	0.241975	0.226928	0.22183	0.206702	0.227705	0.179383	0.17529	0.172118		0.149447	0.189943	0.179196	0.129762	0.151273	0.150393	0.183152	0.154448	0.132889	0.158034	0.131965	0.148409	0.134044	0.133257	0.116868
	Puerto Rico	1.18091	1.20722	1.21453	1.22356	1.24339	1.25081	1.26179	1.25675	1.26026	1.25311	1.26949	1.27228	1.27141	1.28789	1.30312	1.30438	1.29803	1.29778	1.28738	1.28786	1.25796	1.24344	1.22698	1.19242	1.18831	1.19033	1.17164	1.14898	1.14498	1.16709	1.1632	1.14522		0.223372	0.240527	0.241838	0.242043	0.28267	0.301563	0.316435	0.314047	0.328744	0.34925	0.373451	0.378192	0.360305	0.385933	0.402609
	Saint Kitts and Nevis	1.19876	1.2183	1.22545	1.23544	1.25713	1.27035	1.28491	1.28127	1.28561	1.27849	1.28107	1.28167	1.28209	1.29742	1.30773	1.31035	1.30745	1.30467	1.29405	1.29745	1.26658	1.25066	1.23277	1.19737	1.19517	1.19649	1.17849	1.15719	1.15316	1.17665	1.17152	1.15321		0.22632	0.242478	0.243762	0.244126	0.285491	0.305857	0.321747	0.319657	0.334822	0.355781	0.376614	0.380785	0.363104	0.388589	0.40394
	Paraguay	-0.0301541	-0.0706207	-0.0217546	-0.0422944	-0.0599181	0.00837204	0.0127806	0.0124862	0.0145813	0.0126427	0.0135829	0.0136515	0.0136691	0.0132631	0.0137999	0.0137744	0.0137411	0.013686	0.0138926	0.0119603	0.0134718	0.0134271	0.0133424	0.013068	0.0131422	0.0130531	0.0129153	0.012662	0.0127506	0.0129884	0.0130133	0.0127742		-0.0677306	-0.0866148	-0.0467673	-0.0573708	-0.0681754	0.0124857	0.0237561	0.0248064	0.0280697	0.0287295	0.029704	0.030214	0.0300659	0.0289445	0.0303519
	Belize	-0.229451	-0.229175	-0.234084	-0.236182	-0.0891221	-0.0882724	0.0405418	0.0420038	0.142018	0.143377	0.303853	0.36602	0.473894	0.524907	0.487042	0.243609	0.0993607	0.163375	0.0972657	0.0923492	0.0194586	-0.20273	-0.217372	0.132328	0.0034573	0.0733822	-0.186935	-0.183041	-0.269127	-0.908297	-0.806206	-0.682354		-0.684549	-0.672475	-0.664024	-0.657416	-0.548324	-0.525971	-0.440643	-0.439961	-0.372236	-0.366652	-0.250934	-0.213572	-0.155752	-0.1067	-0.126288
	Guadeloupe	1.19876	1.2183	1.22545	1.23544	1.25713	1.27035	1.21879	1.22289	1.23231	1.22119	1.23233	1.23719	1.24117	1.25869	1.27066	1.27321	1.27413	1.27343	1.25289	1.25619	1.21628	1.20143	1.1717	1.06117	1.06037	1.06255	1.05066	1.03166	1.02815	1.07491	1.07149	1.0559		0.22632	0.242478	0.243762	0.244126	0.285491	0.305857	0.321023	0.319072	0.333743	0.353813	0.374146	0.37856	0.361631	0.38638	0.401423
	Guyana	1.19876	1.2183	1.22545	1.23544	1.25713	1.27035	1.28491	1.28127	1.28561	1.27849	1.28107	1.28167	1.28209	1.29742	1.30773	1.31035	1.30745	1.30467	1.29405	1.29745	1.26658	1.25066	1.23277	1.19737	1.19517	1.19649	1.17849	1.15719	1.15316	1.17665	1.17152	1.15321		0.22632	0.242478	0.243762	0.244126	0.285491	0.305857	0.321747	0.319657	0.334822	0.355781	0.376614	0.380785	0.363104	0.388589	0.40394
	French Guiana	1.19876	1.2183	1.22545	1.23544	1.25713	1.27035	1.28491	1.28127	1.28561	1.27849	1.28107	1.28167	1.28209	1.29742	1.30773	1.31035	1.30745	1.30467	1.29405	1.29745	1.26658	1.25066	1.23277	1.19737	1.19517	1.19649	1.17849	1.15719	1.07728	0.0906885	0.087341	0.0833979		0.22632	0.242478	0.243762	0.244126	0.285491	0.305857	0.321747	0.319657	0.334822	0.355781	0.376614	0.380785	0.363104	0.388589	0.40394
	Panama	0.515566	0.201502	0.412973	0.611081	0.289767	0.193377	0.19526	0.25934	0.117326	0.181494	0.238135	0.353264	0.415406	0.355163	0.355103	0.422266	0.37504	0.413611	0.551822	0.387012	0.379114	0.655133	0.457205	0.615005	0.42817	0.446487	0.498288	0.528826	0.468103	0.528455	0.525055	0.530573		0.00558587	-0.0895473	-0.0884583	-0.0595244	-0.0677493	-0.0285671	-0.0296237	-0.0200317	-0.0452786	-0.00522674	0.0110167	0.00340763	0.0168941	0.0288841	0.0294539
Eurasia	Armenia	NA	NA	NA	NA	NA	NA	NA	NA	NA	NA	NA	NA	0.809629	0.36113	0.431281	0.696566	0.416466	0.54809	0.53478	0.451153	0.484434	0.504878	0.308324	0.291993	0.311536	0.304548	0.261054	0.259359	0.308229	0.214898	0.232506	0.241552		NA	NA	NA	NA	NA	NA	NA	NA	NA	NA	NA	NA	0.0917835	0.0783344	0.0866042
	Tajikistan	NA	NA	NA	NA	NA	NA	NA	NA	NA	NA	NA	NA	0.0661938	0.0485542	0.0306276	0.0253696	0.0251395	0.0342393	0.032032	0.0366386	0.0283619	0.0250923	0.0221888	0.022954	0.0218484	0.0196101	0.0260071	0.0324435	0.0313175	0.0312367	0.0458504	0.0588092		NA	NA	NA	NA	NA	NA	NA	NA	NA	NA	NA	NA	0.0408006	0.0372805	0.0340664
	Kyrgyzstan	NA	NA	NA	NA	NA	NA	NA	NA	NA	NA	NA	NA	0.270307	0.258164	0.135742	0.127221	0.139878	0.171629	0.188706	0.103636	0.180723	0.204596	0.212719	0.159287	0.163605	0.160289	0.154232	0.164871	0.115876	0.139211	0.125321	0.100536		NA	NA	NA	NA	NA	NA	NA	NA	NA	NA	NA	NA	0.173151	0.21725	0.136266
	Belarus	NA	NA	NA	NA	NA	NA	NA	NA	NA	NA	NA	NA	1.1411	1.14651	1.14701	1.15381	1.12739	1.1053	1.10012	1.1021	1.07083	1.06473	1.05659	1.03203	1.03957	1.02522	1.01277	0.982271	0.996676	1.04626	1.00299	0.974019		NA	NA	NA	NA	NA	NA	NA	NA	NA	NA	NA	NA	0.17994	0.184541	0.185568
	Latvia	NA	NA	NA	NA	NA	NA	NA	NA	NA	NA	NA	NA	0.365043	0.314667	0.320635	0.311268	0.488487	0.376622	0.366625	0.373903	0.339039	0.356734	0.391953	0.410735	0.315485	0.296595	0.417016	0.38724	0.376367	0.348932	0.435407	0.489131		NA	NA	NA	NA	NA	NA	NA	NA	NA	NA	NA	NA	0.0924021	0.0643265	0.0519322
	Ukraine	NA	NA	NA	NA	NA	NA	NA	NA	NA	NA	NA	NA	1.29777	1.19942	1.15957	1.12853	0.967479	0.939619	0.8865	0.944935	0.90768	0.910312	0.918982	0.88675	0.779306	0.803356	0.886429	0.88578	0.907313	0.926951	0.91591	0.89601		NA	NA	NA	NA	NA	NA	NA	NA	NA	NA	NA	NA	0.908675	0.833824	0.836362
	Azerbaijan	NA	NA	NA	NA	NA	NA	NA	NA	NA	NA	NA	NA	1.21105	1.17335	1.15372	1.17792	1.1771	1.15665	1.13888	1.17983	1.16407	1.06916	1.0131	0.995389	0.969337	0.945619	0.967162	0.925422	0.910916	0.894308	0.824718	0.869068		NA	NA	NA	NA	NA	NA	NA	NA	NA	NA	NA	NA	0.0654668	0.064779	0.0945303
	Lithuania	NA	NA	NA	NA	NA	NA	NA	NA	NA	NA	NA	NA	0.262011	0.144846	0.225537	0.154012	0.174378	0.206739	0.258415	0.280869	0.244118	0.217725	0.183605	0.174408	0.186671	0.261691	0.251733	0.22425	0.216302	0.211352	0.790344	0.755875		NA	NA	NA	NA	NA	NA	NA	NA	NA	NA	NA	NA	0.114605	0.110185	0.108366
	Estonia	NA	NA	NA	NA	NA	NA	NA	NA	NA	NA	NA	NA	1.65462	1.67307	1.6874	1.69474	1.69002	1.68323	1.66531	1.67239	1.63256	1.62753	1.61875	1.59242	1.6008	1.57428	1.55353	1.54174	1.53539	1.43302	1.34905	1.30055		NA	NA	NA	NA	NA	NA	NA	NA	NA	NA	NA	NA	2.04656	2.01558	2.1234
	Kazakhstan	NA	NA	NA	NA	NA	NA	NA	NA	NA	NA	NA	NA	1.43506	1.43035	1.37865	1.41506	1.41373	1.40072	1.39958	1.4015	1.34299	1.34972	1.32011	1.32623	1.36611	1.35732	1.33473	1.338	1.37137	1.37312	1.40591	1.38706		NA	NA	NA	NA	NA	NA	NA	NA	NA	NA	NA	NA	1.60267	1.58108	1.56986
	Georgia	NA	NA	NA	NA	NA	NA	NA	NA	NA	NA	NA	NA	0.467545	0.353232	0.259723	0.288896	0.201268	0.187404	0.2393	0.22641	0.233614	0.21436	0.0806939	0.0985599	0.137024	0.151017	0.273115	0.183229	0.156565	0.141839	0.0852722	0.0426474		NA	NA	NA	NA	NA	NA	NA	NA	NA	NA	NA	NA	0.106573	0.0842665	0.0718987
	Uzbekistan	NA	NA	NA	NA	NA	NA	NA	NA	NA	NA	NA	NA	0.970403	0.954544	0.965329	0.983999	0.970465	0.989457	0.985089	0.986055	0.970457	0.966961	0.959333	0.907128	0.882593	0.878559	0.862728	0.891234	0.793175	0.850359	0.826547	0.826727		NA	NA	NA	NA	NA	NA	NA	NA	NA	NA	NA	NA	0.288547	0.31864	0.356775
	Turkmenistan	NA	NA	NA	NA	NA	NA	NA	NA	NA	NA	NA	NA	1.05494	1.06776	1.0684	1.07485	1.07239	1.06829	1.0638	1.06837	1.05337	1.04991	1.04328	1.02181	1.02741	1.02044	1.00967	0.989869	0.996795	1.01539	1.01733	0.99864		NA	NA	NA	NA	NA	NA	NA	NA	NA	NA	NA	NA	0.229803	0.229576	0.230738
	Russian Federation & U.S.S.R.	1.16462	1.17782	1.18735	1.19101	1.16986	1.16246	1.16973	1.15095	1.13358	1.13068	1.13711	1.13427	1.09053	1.07192	1.08995	1.09742	1.09625	1.07204	1.08823	1.04862	1.02583	0.990975	0.987198	0.973433	0.939317	0.935612	0.946374	0.899731	0.95067	0.908643	0.909692	0.915159		1.03182	1.02697	1.01713	1.00426	0.981407	0.955039	0.955921	0.943472	0.931973	0.950848	0.954565	0.967908	0.989819	1.01271	1.15397
Europe	Hungary	1.58056	1.59921	1.62161	1.47324	1.42428	1.23859	1.2198	1.06034	0.944329	0.910479	0.8999	0.906352	0.938072	0.962069	0.953473	0.974419	0.991961	0.98801	1.00738	1.02395	0.972406	0.969965	0.984472	1.05246	0.955071	0.798228	0.830064	0.804291	0.775064	0.644672	0.654971	0.671317		4.1158	4.10358	4.12589	3.66674	3.62384	2.8687	2.87248	2.6586	2.53784	2.41191	2.49727	2.27842	2.41803	2.30057	2.20837
	Czech Republic	NA	NA	NA	NA	NA	NA	NA	NA	NA	NA	NA	NA	NA	1.34358	1.32191	1.35014	1.34989	1.34149	1.34067	1.3085	1.34602	1.31572	1.21705	1.12077	1.10132	1.10429	1.06553	1.06822	1.02436	0.985257	0.967821	0.91873		NA	NA	NA	NA	NA	NA	NA	NA	NA	NA	NA	NA	NA	3.62971	3.58254
	Gibraltar	1.38407	1.41334	1.45596	1.49109	1.56855	1.60077	1.61944	1.61602	1.61742	1.60917	1.61993	1.62364	1.61096	1.65074	1.63182	1.62863	1.59055	1.53478	1.52987	1.53212	1.51677	1.48366	1.45735	1.40186	1.37751	1.3241	1.26987	1.25001	1.17992	1.18389	1.16609	1.21195		1.00397	1.09491	1.26615	1.3873	1.70021	1.79787	1.85129	1.85457	1.80301	1.84996	1.8699	1.85853	1.77654	1.88581	1.82484
	Serbia	NA	NA	NA	NA	NA	NA	NA	NA	NA	NA	NA	NA	1.32781	1.35637	1.33411	1.34607	1.26965	1.34378	1.28564	1.17013	1.2534	1.24102	1.27279	1.35636	1.33069	1.25307	1.30746	1.32156	1.36482	1.35854	1.28251	1.18359		NA	NA	NA	NA	NA	NA	NA	NA	NA	NA	NA	NA	5.55837	5.66843	5.62002
	Cyprus	1.24848	1.26323	1.27561	1.28628	1.3066	1.31757	1.32432	1.31788	1.32932	1.31797	1.32562	1.33357	1.33401	1.35022	1.35103	1.35919	1.35608	1.35089	1.34521	1.351	1.33203	1.32766	1.31927	1.29211	1.2992	1.29039	1.27677	1.25173	1.25358	1.28399	1.24617	1.21936		0.0683255	0.0680643	0.0674118	0.0668716	0.0674227	0.0664732	0.0665149	0.0663076	0.066947	0.0678901	0.0682006	0.0692593	0.0690336	0.0689655	0.0693146
	Denmark	1.29734	1.32451	1.35469	1.37517	1.39932	1.39952	1.39834	1.3955	1.38912	1.35992	1.34215	1.35485	1.30483	1.29592	1.28651	1.24674	1.26397	1.16231	1.0659	0.991631	0.894407	0.882641	0.837014	0.842636	0.70081	0.597164	0.764588	0.657713	0.61076	0.604484	0.486708	0.389768		1.00504	1.05176	1.10781	1.14187	1.16146	1.11791	1.10762	1.12012	1.09975	1.09612	1.10298	1.12807	1.06879	1.04378	0.997884
	Bosnia and Herzegovina	NA	NA	NA	NA	NA	NA	NA	NA	NA	NA	NA	NA	0.889382	0.541358	0.341565	0.322233	0.558059	0.881348	0.987393	0.893577	0.948594	0.946883	0.935033	1.07992	0.957074	0.938374	0.993569	1.1533	1.15316	1.0782	0.951109	0.828571		NA	NA	NA	NA	NA	NA	NA	NA	NA	NA	NA	NA	1.63633	0.988554	0.612286
	Italy	0.829838	0.853336	0.855318	0.86727	0.861932	0.889391	0.886982	0.957774	0.935388	1.00566	1.0323	0.978968	0.968326	0.965542	0.963566	1.01606	0.98276	0.971074	0.96625	0.93678	0.929267	0.913455	0.943486	0.933258	0.899949	0.898361	0.883169	0.867128	0.834669	0.779125	0.746456	0.70702		0.160541	0.181356	0.210541	0.213179	0.254812	0.264893	0.263772	0.266269	0.265218	0.263207	0.285073	0.257585	0.206819	0.183441	0.194563
	France	0.601393	0.463274	0.479315	0.390759	0.302893	0.251563	0.189307	0.167597	0.156174	0.191976	0.17451	0.202848	0.169538	0.118022	0.113341	0.123014	0.133919	0.118831	0.16134	0.140702	0.131855	0.10958	0.11988	0.125288	0.119849	0.132976	0.117621	0.118397	0.112373	0.109924	0.115045	0.0899982		0.270182	0.237766	0.25537	0.235551	0.212743	0.191107	0.166538	0.155658	0.15133	0.1685	0.164228	0.173812	0.161852	0.142284	0.138825
	Poland	1.52206	1.54073	1.56559	1.57651	1.60695	1.61452	1.62772	1.62539	1.63883	1.62884	1.63826	1.6418	1.64112	1.66375	1.66162	1.66983	1.66472	1.65244	1.64059	1.65049	1.62599	1.60934	1.59139	1.57144	1.56084	1.52694	1.50356	1.45187	1.42941	1.39441	1.36262	1.30148		3.12341	3.1264	3.13392	3.11072	3.15792	3.10898	3.12255	3.11983	3.15054	3.20089	3.21597	3.25615	3.24437	3.24319	3.25019
	Sweden	0.0886578	0.0426629	0.0447464	0.0361588	0.0353104	0.0529221	0.0553462	0.0498915	0.0477774	0.0400217	0.0265248	0.0408462	0.0432022	0.0487141	0.0582712	0.0527284	0.0892861	0.0464981	0.0425408	0.0453007	0.0187388	0.030245	0.0375367	0.0484248	-0.00276624	-0.0128428	-0.0199787	-0.0308986	-0.0323564	-0.0521972	-0.0335653	-0.0116948		0.0474488	0.055534	0.059303	0.0611374	0.0692435	0.0766341	0.0854743	0.0804857	0.082169	0.0779278	0.0729193	0.0865478	0.078246	0.0782135	0.0890598
	Norway	0.0117052	0.0116621	0.012817	0.0131842	0.0134777	0.0136104	0.0143491	0.0144609	0.0140503	0.0137648	0.0111524	0.0111081	0.0111164	0.010919	0.0116363	0.0115422	0.0120901	0.0122396	0.0116476	0.0121431	0.011497	0.0106213	0.0111627	0.0106125	0.0106449	0.0112696	0.0114603	0.0127072	0.0110051	0.0330379	0.0364744	0.0309143		0.0301019	0.0299845	0.0296798	0.0297442	0.0300268	0.0295162	0.0293736	0.0292388	0.0295506	0.0299454	0.0302789	0.0306456	0.0306147	0.030267	0.029971
	Portugal	0.51386	0.707321	0.606725	0.620216	0.556702	0.480642	0.694203	0.678719	0.530214	0.97661	0.863639	0.887	1.07383	0.941351	0.856699	0.987598	0.749389	0.799968	0.828917	0.995422	0.846974	0.780601	0.926906	0.710161	0.807475	0.902726	0.728601	0.661302	0.668476	0.627563	0.396615	0.464023		0.0391448	0.0404832	0.0282984	0.0243198	0.0192551	0.0645857	0.206233	0.324644	0.314861	0.376939	0.415603	0.430343	0.451175	0.478055	0.480544
	Romania	0.997658	0.930534	0.949153	0.999905	0.99241	1.07783	1.11697	1.11063	1.1074	1.11452	1.08559	0.978236	1.04586	1.04932	1.05586	1.00635	1.01003	0.850187	0.769044	0.769622	0.879449	0.90072	0.872356	0.952299	0.858952	0.799047	0.861481	0.846854	0.788938	0.750712	0.667306	0.77467		2.15228	0.939539	0.988915	1.08477	1.05098	2.11197	2.1033	2.20407	2.52074	2.51385	1.9858	1.92282	2.35518	2.37957	2.47175
	Belgium	0.938948	0.947039	0.927377	0.723297	0.685291	0.55064	0.466872	0.467642	0.479369	0.522563	0.534063	0.532963	0.514188	0.534576	0.563578	0.555492	0.527562	0.477208	0.512005	0.433613	0.463207	0.426943	0.418111	0.411073	0.411129	0.393854	0.357105	0.327127	0.302013	0.288293	0.288062	0.223359		0.272161	0.317523	0.342092	0.311881	0.332237	0.279323	0.265469	0.264103	0.273662	0.283193	0.29475	0.288256	0.278655	0.283453	0.289021
	Slovakia	NA	NA	NA	NA	NA	NA	NA	NA	NA	NA	NA	NA	NA	0.645069	0.590107	0.685349	0.671177	0.70189	0.676327	0.656561	0.541736	0.534303	0.478531	0.534401	0.533207	0.495701	0.4482	0.438781	0.422314	0.426302	0.393841	0.402009		NA	NA	NA	NA	NA	NA	NA	NA	NA	NA	NA	NA	NA	1.27383	1.1013
	Germany	1.18679	1.19329	1.19392	1.21173	1.17395	1.11019	1.13663	1.09817	1.07741	1.06018	1.07914	1.08815	1.04275	1.05405	1.04078	1.03344	1.02071	0.988666	0.995727	0.969222	0.95535	0.930983	0.929802	0.918853	0.88673	0.882865	0.831191	0.806096	0.773493	0.714651	0.702082	0.693278		2.56227	2.63673	2.65104	2.69255	2.62866	2.46067	2.47528	2.38172	2.35532	2.36544	2.39774	2.42583	2.33235	2.33907	2.31147
	Greece	1.25954	1.3331	1.34627	1.47917	1.47125	1.52584	1.53389	1.5697	1.6416	1.65279	1.66265	1.58336	1.64163	1.67528	1.67502	1.62821	1.59845	1.62082	1.61507	1.56464	1.55875	1.60073	1.55343	1.45398	1.4573	1.44029	1.36131	1.40608	1.37946	1.37055	1.29126	1.29045		4.86691	5.70761	5.80256	6.57793	6.4982	6.76616	7.05317	7.24742	7.81491	7.96117	7.88008	7.3234	7.83887	7.9994	8.08163
	Luxembourg	1.09142	1.0245	0.83943	0.904762	1.07013	1.14568	1.0315	1.03132	1.00089	1.21171	1.22885	1.22039	1.16696	1.23869	1.08747	0.836905	0.877253	0.696358	0.445856	0.517082	0.430111	0.530324	1.19092	1.16337	1.16421	1.15189	1.12474	1.07237	1.03032	1.07532	1.07444	0.98482		1.09596	1.15841	1.0796	1.09644	1.3151	1.40955	1.27244	1.09635	1.18103	1.42064	1.47366	1.5021	1.4157	1.50659	1.23738
	Netherlands	0.857242	0.893709	0.969869	0.984711	1.01422	1.00156	0.992736	1.00439	1.06881	1.0403	1.07681	1.05031	1.03688	1.02936	1.05096	1.06298	1.01371	1.00141	0.992128	0.948923	0.938909	0.933916	0.909084	0.901958	0.866368	0.788456	0.777829	0.798029	0.75764	0.735167	0.714727	0.675094		0.128806	0.148108	0.232108	0.253595	0.269978	0.259928	0.248621	0.260031	0.322309	0.31222	0.345567	0.313766	0.303767	0.29039	0.314518
	Faeroe Islands	0.895378	0.905961	0.938891	0.946741	0.983252	1.01069	1.01587	1.01093	0.934556	0.861346	0.842176	0.847227	0.747113	0.799871	0.765934	0.770562	0.852693	0.800267	0.796904	0.905221	0.846246	0.889581	0.785027	0.847229	0.773087	0.710527	0.727973	0.707174	0.762031	0.776243	0.930545	0.763442		0.057493	0.0572732	0.0574367	0.0569764	0.0580695	0.0577942	0.0578304	0.0576502	0.0558023	0.0547048	0.0542579	0.0551002	0.0520084	0.0532077	0.0524872
	Iceland	0.0295947	0.0350543	0.0199556	0.0167974	0.0169152	0.0171253	0.0176183	0.0178327	0.0179049	0.0178742	0.0185493	0.018313	0.0173475	0.0179337	0.0178991	0.0183538	0.0190112	0.0189505	0.0219051	0.0262729	0.0270514	0.0276217	0.0267002	0.0257394	0.0263609	0.0276899	0.0330455	0.0350072	0.0311522	0.0344969	0.0338622	0.0341393		0.0354603	0.0422645	0.042788	0.0431983	0.0430347	0.0426627	0.0440786	0.0449718	0.0451217	0.046187	0.0484042	0.0479235	0.0443364	0.0456014	0.0456732
	Croatia	NA	NA	NA	NA	NA	NA	NA	NA	NA	NA	NA	NA	0.597608	0.629593	0.434114	0.501294	0.360939	0.561343	0.616605	0.576876	0.565255	0.570788	0.684501	0.760848	0.570063	0.608023	0.621718	0.749206	0.678678	0.545271	0.465849	0.391396		NA	NA	NA	NA	NA	NA	NA	NA	NA	NA	NA	NA	0.0445868	0.114877	0.0589108
	Austria	0.337271	0.32813	0.326031	0.333092	0.35839	0.344852	0.339035	0.404977	0.297998	0.328225	0.408974	0.438851	0.339061	0.296729	0.341175	0.339039	0.387262	0.377123	0.345882	0.324432	0.315588	0.359767	0.358188	0.450426	0.406209	0.396037	0.347561	0.285528	0.280753	0.253602	0.314829	0.272354		0.107562	0.136504	0.130599	0.131544	0.145783	0.142356	0.133161	0.162715	0.125979	0.144111	0.177507	0.190935	0.143324	0.114008	0.132065
	Turkey	0.801549	0.754454	0.764456	0.955987	0.941656	1.10371	1.13452	0.883917	0.619115	0.926046	0.878237	0.905356	0.907368	0.814833	0.915103	0.86442	0.847119	0.888389	0.886543	0.968784	0.996412	1.05432	0.933216	0.898634	0.84384	0.916407	0.893293	0.948531	0.982526	0.967564	0.877402	0.889479		1.41512	1.33104	1.33877	1.69007	1.79733	2.33038	2.49057	1.94815	1.34563	1.97163	1.8599	1.92953	1.95569	1.72177	1.94184
	Montenegro	NA	NA	NA	NA	NA	NA	NA	NA	NA	NA	NA	NA	NA	NA	NA	NA	NA	NA	NA	NA	NA	NA	NA	NA	NA	NA	0.622631	0.642876	0.684289	0.396101	0.501537	0.545785		NA	NA	NA	NA	NA	NA	NA	NA	NA	NA	NA	NA	NA	NA	NA
	Switzerland	0.031915	0.0286099	0.0289848	0.0298567	0.0294011	0.0294119	0.0303161	0.0302009	0.0156954	0.0325127	0.017526	0.0227749	0.0238039	0.0171592	0.0226299	0.0245567	0.0192311	0.0182147	0.0214211	0.0177856	0.0166902	0.0143049	0.0139181	0.0145686	0.0129854	0.010438	0.00725948	0.00608242	0.00423889	0.002933	0.00674051	0.00635379		0.0575214	0.0586595	0.0570648	0.0571503	0.0647328	0.0665344	0.0649146	0.0618582	0.060405	0.0683973	0.0659333	0.0641037	0.0639503	0.0620581	0.0619289
	Ireland	0.963828	0.901648	0.85688	0.840706	0.855813	0.863654	1.094	1.31198	1.27895	1.28963	1.29851	1.29703	1.32329	1.30755	1.29642	1.31187	1.2739	1.24401	1.21282	1.18369	1.15293	1.16759	1.11235	1.05045	1.04826	1.04251	0.968512	0.913958	0.877806	0.820124	0.825058	0.776308		0.0353343	0.0388527	0.0504209	0.055037	0.0564566	0.0598745	0.287046	0.760211	0.815838	0.856816	0.823987	0.776097	0.824232	0.780339	0.758547
	United Kingdom	1.41598	1.42499	1.39548	1.37767	1.33657	1.35395	1.39123	1.37949	1.35767	1.30659	1.32223	1.317	1.25145	1.13248	1.07386	1.0544	1.00908	0.896825	0.886307	0.83926	0.879511	0.868404	0.836331	0.846184	0.841718	0.82408	0.863343	0.833889	0.832209	0.741173	0.762982	0.70236		1.21183	1.23343	1.17894	1.15351	0.772906	0.993272	1.1043	1.11634	1.08967	1.06892	1.06236	1.09637	1.01332	0.894066	0.837885
	Slovenia	NA	NA	NA	NA	NA	NA	NA	NA	NA	NA	NA	NA	0.666715	0.680713	0.621745	0.633756	0.594282	0.645069	0.640546	0.60154	0.592678	0.597353	0.626159	0.62697	0.576165	0.589021	0.601354	0.602097	0.53531	0.54164	0.551419	0.556867		NA	NA	NA	NA	NA	NA	NA	NA	NA	NA	NA	NA	2.1242	2.15555	1.97668
	Bulgaria	1.06196	0.988122	1.00898	0.97649	1.00592	0.943666	1.00968	1.01174	0.870585	0.883744	0.991662	0.977768	1.00067	0.944457	0.917351	0.870526	0.822172	0.877728	0.862156	0.848508	0.803952	0.853596	0.752276	0.845563	0.847961	0.773891	0.765396	0.924367	0.912227	0.8867	0.872199	0.840636		2.77675	2.58159	2.62544	2.49837	2.5473	2.03931	2.33263	2.42435	2.0149	2.09352	2.81341	2.80932	2.83513	2.57727	2.54896
	Finland	0.664627	0.33892	0.322978	0.323435	0.370826	0.482233	0.470119	0.483019	0.372946	0.509471	0.559374	0.556525	0.289006	0.330048	0.424629	0.371352	0.479541	0.370725	0.234084	0.285346	0.25726	0.34071	0.351005	0.454196	0.377946	0.215944	0.376601	0.335851	0.223564	0.280219	0.321193	0.24199		0.51528	0.259768	0.265873	0.281122	0.316026	0.396636	0.378573	0.386861	0.310076	0.395715	0.420699	0.427769	0.226028	0.259171	0.3316
	Albania	0.255019	0.234854	0.215349	0.19884	0.183125	0.172467	0.165188	0.090615	0.0839399	0.0870585	0.147138	0.0680388	0.061513	0.0758239	0.0553506	0.0725156	0.0550917	0.0503014	0.0482293	0.0387568	0.0501793	0.0568755	0.0709066	0.0254644	0.0318826	0.027325	0.0330165	0.0390251	0.0291682	0.0129884	0.0130133	0.0127742		0.0378479	0.037003	0.0360023	0.0351802	0.0349247	0.034088	0.0338796	0.0316933	0.0317883	0.0323469	0.0342129	0.0324155	0.0321199	0.0324766	0.0320509
	Spain	0.937438	0.997688	0.993039	0.990311	0.835687	0.833227	0.802424	0.745702	0.576685	0.763697	0.745177	0.734444	0.8218	0.774529	0.757721	0.818415	0.664718	0.736645	0.725735	0.841509	0.804409	0.722354	0.814017	0.699829	0.740364	0.785423	0.698674	0.689662	0.614095	0.559911	0.448403	0.513916		0.441497	0.505579	0.56732	0.607848	0.611832	0.635319	0.629013	0.590898	0.458544	0.60971	0.597039	0.584591	0.624971	0.612987	0.589554
Middle East	Qatar	0.994325	1.00443	1.01408	1.02068	1.03756	1.0441	1.04973	1.04458	1.05123	1.04225	1.04831	1.05459	1.05494	1.06776	1.0684	1.07485	1.07239	1.06829	1.0638	1.06837	1.05337	1.04991	1.04328	1.02181	1.02741	1.02044	1.00967	0.989869	0.996795	1.01539	1.01733	0.99864		0.223164	0.223299	0.221273	0.220584	0.221972	0.220064	0.220045	0.219384	0.222857	0.225996	0.22703	0.230554	0.229803	0.229576	0.230738
	Iraq	1.11447	1.15226	1.18525	1.2222	1.24605	1.25677	1.26623	1.25798	1.23197	1.22096	1.24027	1.26715	1.24823	1.26636	1.26236	1.27407	1.27065	1.26958	1.26725	1.26878	1.25343	1.25612	1.26277	1.2437	1.26289	1.14732	1.07615	1.06688	1.05461	0.988929	0.969875	0.91979		0.0998471	0.0826656	0.0841687	0.0740141	0.0751395	0.0772582	0.0773475	0.0796896	0.100494	0.106469	0.0942165	0.0950126	0.0952935	0.0976092	0.103204
	Saudi Arabia	1.15922	1.14674	1.1458	1.16219	1.17828	1.19068	1.1916	1.17532	1.18189	1.17633	1.18248	1.18796	1.18048	1.19403	1.19706	1.1988	1.19327	1.18936	1.17975	1.18346	1.17654	1.18777	1.18813	1.16139	1.17257	1.1636	1.14402	1.11492	1.11957	1.16975	1.181	1.15123		0.10786	0.098847	0.0939735	0.0953815	0.0954539	0.0948786	0.0933509	0.0898429	0.0895946	0.092281	0.092488	0.093414	0.090626	0.0902909	0.0914719
	Lebanon	0.852251	0.868353	0.980675	1.03163	1.04701	1.03598	1.06497	1.04324	1.04904	1.06328	1.16772	1.1009	1.12428	1.13792	1.13269	1.17478	1.19491	1.20286	1.21493	1.29542	1.25342	1.28229	1.24001	1.14881	1.17891	1.17813	1.19807	1.1895	1.2247	1.22046	1.19823	1.18399		0.0561699	0.0561373	0.0586745	0.0594502	0.0599138	0.0585092	0.0592128	0.0585615	0.0590344	0.0605358	0.0636467	0.0624853	0.0629496	0.062887	0.063035
	United Arab Emirates	0.99699	1.00886	1.01867	1.0272	1.04342	1.05216	1.05761	1.05242	1.06157	1.05248	1.0586	1.06493	1.06527	1.07823	1.07889	1.08368	1.08195	1.07997	1.07408	1.07795	1.06199	1.05769	1.05091	1.02923	1.03376	1.02621	1.01511	0.994751	1.00129	1.01977	1.02166	1.00287		0.221541	0.220645	0.218575	0.216816	0.218602	0.215539	0.21564	0.214995	0.217057	0.220132	0.221134	0.224577	0.22385	0.223618	0.224747
	Kuwait	1.10192	1.12465	1.19021	1.19844	1.21944	1.24256	1.23047	1.224	1.24284	1.2212	1.20209	1.30604	1.22825	1.17423	1.1955	1.20715	1.17898	1.18424	1.22754	1.25967	1.24029	1.2424	1.25861	1.2256	1.22396	1.22269	1.19292	1.16825	1.16647	1.20657	1.19327	1.1624		0.157611	0.15119	0.117654	0.117707	0.117487	0.108606	0.118991	0.118893	0.115433	0.123379	0.138955	0.0851793	0.129961	0.169034	0.158146
	Israel	1.24848	1.26323	1.33678	1.39799	1.47916	1.50703	1.51861	1.49588	1.49265	1.48388	1.5011	1.52165	1.53806	1.57024	1.5658	1.58268	1.60335	1.6039	1.59349	1.58989	1.57312	1.59066	1.58807	1.55366	1.53924	1.51286	1.46768	1.43004	1.39638	1.40526	1.3809	1.36325		0.0683255	0.0680643	0.443742	0.743059	1.10416	1.17935	1.20263	1.1137	1.02887	1.06294	1.11931	1.20652	1.30531	1.38711	1.36116
	Iran (Islamic Republic of)	1.27242	1.28464	1.22438	1.4864	1.51717	1.61005	1.59789	1.34514	1.41636	1.3441	1.33217	1.33678	1.2584	1.32559	1.36936	1.40805	1.41326	1.3756	1.25649	1.31914	1.36885	1.32899	1.26186	1.19685	1.2273	1.14886	1.17428	1.16147	1.19158	1.14373	1.12976	1.20055		0.0887578	0.0884149	0.0874676	0.0930794	0.0948114	0.0948968	0.0946821	0.0900462	0.0934274	0.093627	0.0954253	0.0964969	0.0933374	0.0946473	0.0977931
	Oman	1.04349	1.06743	1.08272	1.09017	1.10742	1.11377	1.10879	1.10054	1.10393	1.0914	1.09926	1.10725	1.10733	1.12102	1.12257	1.13036	1.12189	1.11482	1.1105	1.11554	1.10121	1.09898	1.09297	1.07047	1.07634	1.06904	1.05774	1.037	1.04426	1.06373	1.06577	1.04619		0.193209	0.185508	0.180894	0.180369	0.181837	0.180936	0.187028	0.188041	0.193311	0.197813	0.197847	0.200108	0.199617	0.199287	0.199797
	Bahrain	0.987298	0.998968	1.00876	1.01719	1.03326	1.04194	1.04728	1.04218	1.05123	1.04225	1.04831	1.05459	1.05494	1.06776	1.0684	1.07485	1.07239	1.06829	1.0638	1.06837	1.05337	1.04991	1.04328	1.02181	1.02741	1.02044	1.02376	0.995943	0.996906	1.01539	1.01733	0.99864		0.227445	0.226576	0.224404	0.222606	0.22444	0.221279	0.221418	0.220728	0.222857	0.225996	0.22703	0.230554	0.229803	0.229576	0.230738
	Yemen	1.24848	1.26323	1.27561	1.28628	1.3066	1.31757	1.32432	1.31788	1.32932	1.31797	1.32562	1.33357	1.33401	1.35022	1.35103	1.35919	1.35608	1.35089	1.34521	1.351	1.33203	1.32766	1.31927	1.29211	1.2992	1.29039	1.27677	1.25173	1.26049	1.28399	1.21498	1.20569		0.0683255	0.0680643	0.0674118	0.0668716	0.0674227	0.0664732	0.0665149	0.0663076	0.066947	0.0678901	0.0682006	0.0692593	0.0690336	0.0689655	0.0693146
	Jordan	1.24848	1.26323	1.27561	1.28628	1.3066	1.31757	1.32432	1.3127	1.31875	1.29131	1.28876	1.30212	1.30201	1.31225	1.30514	1.31886	1.31721	1.31378	1.31442	1.31967	1.29824	1.29192	1.28761	1.26004	1.15519	1.13529	1.08311	1.0453	1.04204	1.03458	1.08929	1.18536		0.0683255	0.0680643	0.0674118	0.0668716	0.0674227	0.0664732	0.0665149	0.0661616	0.0666486	0.0807385	0.0870006	0.0874462	0.08554	0.0869837	0.0938373
	Syrian Arab Republic	0.399965	0.510404	0.621634	0.802506	0.78126	0.818557	0.88218	0.860349	0.821601	0.825111	0.848543	0.82627	0.796316	0.853996	0.955796	1.04101	1.05961	1.05971	1.0773	1.09	1.05296	1.03827	1.0346	1.034	1.01074	1.05283	1.03435	1.05238	1.08665	1.10425	1.06442	1.03523		0.0474155	0.0497949	0.0517344	0.0579056	0.0613485	0.0620968	0.0650111	0.0643138	0.068151	0.0820479	0.0846496	0.104122	0.099609	0.0990948	0.100462
North America	United States of America	1.12379	1.14125	1.11976	1.1306	1.15359	1.16827	1.1565	1.1662	1.17684	1.13685	1.11551	1.10597	1.11998	1.13966	1.13474	1.11501	1.11924	1.13557	1.13374	1.12325	1.12633	1.12356	1.10002	1.08746	1.0875	1.08627	1.05834	1.04346	1.03956	1.016	1.02907	0.972998		1.15637	1.18703	1.18978	1.20662	1.2391	1.24853	1.22685	1.24921	1.26302	1.2137	1.2075	1.20632	1.22107	1.2199	1.20895
	Saint Pierre and Miquelon	1.41719	1.44216	1.47239	1.49927	1.52702	1.54709	1.56093	1.55412	1.57273	1.53577	1.54784	1.55454	1.5524	1.56987	1.56176	1.56693	1.57815	1.56858	1.55041	1.55453	1.53069	1.51234	1.49987	1.47513	1.47364	1.46067	1.4393	1.40079	1.41277	1.4173	1.41715	1.37834		1.49665	1.54132	1.6048	1.64174	1.68655	1.69591	1.6947	1.70298	1.72245	1.67013	1.70622	1.72813	1.72354	1.71266	1.69817
	Canada	0.309075	0.291264	0.322767	0.312116	0.317393	0.295328	0.265903	0.297996	0.328279	0.362196	0.32499	0.31825	0.3285	0.296239	0.288264	0.305015	0.293075	0.327794	0.376003	0.363547	0.371805	0.393761	0.370738	0.378508	0.355383	0.336094	0.317546	0.327103	0.321887	0.291452	0.301412	0.270941		0.41987	0.416298	0.453824	0.451917	0.486107	0.43679	0.392678	0.430257	0.461991	0.475438	0.435995	0.452085	0.447654	0.404593	0.411513
	Greenland	1.41719	1.44216	1.47239	1.49927	1.52702	1.54709	1.56093	1.55412	1.57273	1.53577	1.54784	1.55454	1.5524	1.56987	1.56176	1.56693	1.57815	1.56858	1.55041	1.55453	1.53069	1.51234	1.49987	1.47513	1.47364	1.46067	1.4393	1.40079	1.41277	1.4173	1.41715	1.37834		1.49665	1.54132	1.6048	1.64174	1.68655	1.69591	1.6947	1.70298	1.72245	1.67013	1.70622	1.72813	1.72354	1.71266	1.69817
	Bermuda	1.41719	1.44216	1.47239	1.49927	1.52702	1.54709	1.56093	1.55412	1.57273	1.53577	1.54784	1.55454	1.5524	1.56987	1.56176	1.56693	1.57815	1.56858	1.55041	1.55453	1.53069	1.51234	1.49987	1.47513	1.47364	1.46067	1.4393	1.40079	1.41277	1.4173	1.41715	1.37834		1.49665	1.54132	1.6048	1.64174	1.68655	1.69591	1.6947	1.70298	1.72245	1.67013	1.70622	1.72813	1.72354	1.71266	1.69817
	Mexico	1.05281	0.981165	1.06094	1.13855	1.13161	1.12873	1.23145	1.25959	1.25003	1.20991	1.16021	1.13648	1.08731	1.10458	1.22382	1.10244	1.10424	1.16698	1.19149	1.13627	1.12213	1.13661	1.09478	1.03709	1.03759	1.02686	0.972385	0.955273	0.882411	0.950188	0.93099	0.910447		0.0767108	0.0735528	0.131081	0.179333	0.20205	0.217824	0.307869	0.327166	0.33874	0.321829	0.326738	0.337514	0.331382	0.380837	0.428144
REGIONS	North America	1.01205	1.01958	1.00651	1.01445	1.03129	1.03738	1.02515	1.0365	1.05337	1.03402	1.01487	1.00168	1.01138	1.02507	1.02184	1.00575	1.00811	1.0302	1.04095	1.02775	1.02946	1.03186	1.00849	0.99848	0.996195	0.990545	0.964023	0.950552	0.942467	0.922315	0.937496	0.882552		1.03164	1.05095	1.05537	1.06916	1.09892	1.09614	1.07237	1.0935	1.1135	1.08402	1.07959	1.07686	1.08595	1.08165	1.07143
	Africa	0.982876	1.07219	1.10066	1.12701	1.17241	1.17675	1.1618	1.18742	1.16973	1.15974	1.17278	1.17103	1.17175	1.20805	1.20008	1.19893	1.19398	1.19149	1.18323	1.14779	1.12974	1.11874	1.10559	1.09724	1.10555	1.09779	1.09112	1.06831	1.07078	1.07343	1.06579	1.02932		1.25162	1.33908	1.34841	1.31965	1.32959	1.27388	1.23622	1.26074	1.23871	1.25074	1.27345	1.27551	1.25918	1.29228	1.28158
	Central and South America	0.458717	0.472042	0.450481	0.428165	0.413613	0.397807	0.403667	0.390598	0.406016	0.40338	0.36989	0.363733	0.3644	0.360961	0.34499	0.372079	0.371669	0.375408	0.391224	0.409318	0.394941	0.395251	0.376255	0.369498	0.379147	0.365618	0.362413	0.365231	0.376368	0.35174	0.360844	0.347865		0.141568	0.161602	0.1476	0.12621	0.146084	0.14772	0.154517	0.143663	0.147384	0.169	0.154091	0.158034	0.136854	0.136885	0.135893
	Europe	0.933791	0.900595	0.903262	0.884756	0.850359	0.831871	0.835639	0.816171	0.781351	0.800252	0.800306	0.794113	0.773312	0.755628	0.752208	0.75435	0.748816	0.721336	0.717853	0.703631	0.701195	0.690153	0.690646	0.693631	0.672623	0.66398	0.655615	0.643001	0.61827	0.586145	0.560882	0.54731		1.26745	1.23499	1.25019	1.25701	1.21174	1.21696	1.23558	1.20615	1.19478	1.19663	1.18209	1.15723	1.18837	1.20581	1.20113
	Asia and Oceania	1.03889	1.05093	1.05316	1.05578	1.0895	1.11334	1.13613	1.15624	1.17445	1.17881	1.20263	1.23191	1.26227	1.27551	1.27629	1.28505	1.30176	1.29822	1.28708	1.31482	1.32264	1.32288	1.34362	1.35035	1.35399	1.35215	1.35865	1.36962	1.37115	1.3584	1.3451	1.36159		0.68919	0.705203	0.714342	0.715564	0.752741	0.796379	0.836937	0.860033	0.869636	0.894015	0.923963	0.951264	0.947811	0.934169	0.923195
	Eurasia	1.16462	1.17782	1.18735	1.19101	1.16986	1.16246	1.16973	1.15095	1.13358	1.13068	1.13711	1.13427	1.10894	1.07476	1.07496	1.07977	1.04779	1.02818	1.02831	1.00993	0.989025	0.964396	0.957848	0.940315	0.904853	0.906678	0.926358	0.895015	0.933869	0.908102	0.913619	0.911865		1.03182	1.02697	1.01713	1.00426	0.981407	0.955039	0.955921	0.943472	0.931973	0.950848	0.954565	0.967908	0.91525	0.918912	1.0084
	Middle East	1.12935	1.1437	1.15133	1.23436	1.2587	1.28444	1.28323	1.22353	1.24528	1.22257	1.22969	1.24404	1.2213	1.24693	1.26102	1.27207	1.27183	1.26257	1.23084	1.25226	1.25526	1.24797	1.22815	1.18996	1.19833	1.16416	1.15307	1.13192	1.14027	1.14145	1.13432	1.13186		0.110671	0.105354	0.141954	0.170418	0.198992	0.201342	0.203249	0.197428	0.191864	0.198106	0.20236	0.210644	0.22305	0.2285	0.226593
	World	1	1	1	1	1	1	1	1	1	1	1	1	1	1	1	1	1	1	1	1	1	1	1	1	1	1	1	1	1	1	1	1		1	1	1	1	1	1	1	1	1	1	1	1	1	1	1
[truncated: 273 more columns]
